# Supplementary material for: SiDCoN: A Tool to Aid Scoring of DNA Copy Number Changes in SNP Chip Data
Source: PLoS One. 2007 Oct 31;2(10):e1093. doi: 10.1371/journal.pone.0001093 (PMC2034603; doi:10.1371/journal.pone.0001093)
Supplement: Supplement S1 — Simulated DNA Copy Number (SiDCoN) - a spreadsheet application designed to simulate the appearance of B-allele and logR plots for all known types of tumour DNA copy number changes in the presence or absence of stromal contamination (4.89 MB XLS) [file pone.0001093.s001.xls]

## Sheet: datasheet
Description	Geno1	fraction1	prop-A1	prop-B1		Geno2	fraction2	prop-A2	prop-B2		Geno3	fraction3	prop-A3	prop-B3		GenoS	fractionS	prop-As	prop-Bs		Ballele	LogR	random factor	0.1				Position	Ballele	LogR
Normal	AB	1	1	1				0	0			0	0	0		AB	0	0	0		50	0	0.988031	0.0274359				1	0.980239	-0.0683462
Normal	AB	1	1	1				0	0				0	0		AB	0	0	0		50	0	0.109995	-0.0320483				2	0.0030178	-0.0844044
Normal	AB	1	1	1				0	0				0	0		AB	0	0	0		50	0	0.623305	0.00426322				3	0.504263	-0.0627535
Normal	AB	1	1	1				0	0				0	0		AB	0	0	0		50	0	0.665599	-0.00913632				4	0.490864	0.0136131
Normal	AB	1	1	1				0	0				0	0		AB	0	0	0		50	0	0.184746	0.0149273				5	0.0016879	-0.0188777
Normal	AB	1	1	1				0	0				0	0		AB	0	0	0		50	0	0.216683	0.00331595				6	0.0032345	0.0385564
Normal	AB	1	1	1				0	0				0	0		AB	0	0	0		50	0	0.291931	-0.0170261				7	0.000968028	0.00852042
Normal	AB	1	1	1				0	0				0	0		AB	0	0	0		50	0	0.714127	0.0244768				8	1	0.0826068
Normal	AB	1	1	1				0	0				0	0		AB	0	0	0		50	0	0.0988243	0.000525646				9	0.00241891	-0.105367
Normal	AB	1	1	1				0	0				0	0		AB	0	0	0		50	0	0.567785	0.0277357				10	0.527736	-0.0024406
Normal	AB	1	1	1				0	0				0	0		AB	0	0	0		50	0	0.17875	0.0396456				11	0.00495775	-0.116873
Normal	AB	1	1	1				0	0				0	0		AB	0	0	0		50	0	0.958856	0.0145295				12	0.992397	0.055548
Normal	AB	1	1	1				0	0				0	0		AB	0	0	0		50	0	0.322934	0.0112054				13	0.488795	-0.00239107
Normal	AB	1	1	1				0	0				0	0		AB	0	0	0		50	0	0.206047	0.0689728				14	0.00230885	-0.00406664
Normal	AB	1	1	1				0	0				0	0		AB	0	0	0		50	0	0.0310206	-0.0204555				15	0.00213958	0.249472
Normal	AB	1	1	1				0	0				0	0		AB	0	0	0		50	0	0.197652	-0.0535763				16	0.00404307	-0.0390331
Normal	AB	1	1	1				0	0				0	0		AB	0	0	0		50	0	0.372733	-0.00179319				17	0.501793	0.0688546
Normal	AB	1	1	1				0	0				0	0		AB	0	0	0		50	0	0.793008	0.0143163				18	1	-0.00401531
Normal	AB	1	1	1				0	0				0	0		AB	0	0	0		50	0	0.592978	0.0493888				19	0.549389	0.0610488
Normal	AB	1	1	1				0	0				0	0		AB	0	0	0		50	0	0.76061	0.00536957				20	0.992487	-0.0379489
Normal	AB	1	1	1				0	0				0	0		AB	0	0	0		50	0	0.752484	0.0493935				21	0.999192	0.00461386
Normal	AB	1	1	1				0	0				0	0		AB	0	0	0		50	0	0.393989	0.00405013				22	0.49595	0.209536
Normal	AB	1	1	1				0	0				0	0		AB	0	0	0		50	0	0.897758	0.0480858				23	0.999273	-0.0140084
Normal	AB	1	1	1				0	0				0	0		AB	0	0	0		50	0	0.0270781	-0.0142816				24	0.00130207	-0.0850413
Normal	AB	1	1	1				0	0				0	0		AB	0	0	0		50	0	0.368986	0.0715688				25	0.428431	0.0609591
Normal	AB	1	1	1				0	0				0	0		AB	0	0	0		50	0	0.225301	0.0738885				26	0.0161245	0.339313
Normal	AB	1	1	1				0	0				0	0		AB	0	0	0		50	0	0.7382	-0.0552177				27	0.989091	0.0396357
Normal	AB	1	1	1				0	0				0	0		AB	0	0	0		50	0	0.079993	0.0508404				28	0.00441703	-0.268113
Normal	AB	1	1	1				0	0				0	0		AB	0	0	0		50	0	0.9446	-0.00854283				29	0.990395	-0.158905
Normal	AB	1	1	1				0	0				0	0		AB	0	0	0		50	0	0.976337	0.000980308				30	1	-0.015876
Normal	AB	1	1	1				0	0				0	0		AB	0	0	0		50	0	0.0831629	-0.0329834				31	8.15253e-05	-0.00365305
Normal	AB	1	1	1				0	0				0	0		AB	0	0	0		50	0	0.86694	-0.0084365				32	1	0.0604831
Normal	AB	1	1	1				0	0				0	0		AB	0	0	0		50	0	0.398375	-0.0239936				33	0.523994	-0.0160364
Normal	AB	1	1	1				0	0				0	0		AB	0	0	0		50	0	0.787422	-0.0146759				34	1	-0.0262355
Normal	AB	1	1	1				0	0				0	0		AB	0	0	0		50	0	0.710718	-0.00759845				35	1	0.0667604
Normal	AB	1	1	1				0	0				0	0		AB	0	0	0		50	0	0.0980059	0.0181247				36	0.000744693	-0.0138835
Normal	AB	1	1	1				0	0				0	0		AB	0	0	0		50	0	0.961802	0.0199738				37	0.996514	0.0183308
Normal	AB	1	1	1				0	0				0	0		AB	0	0	0		50	0	0.45642	0.0574389				38	0.442561	-0.0283861
Normal	AB	1	1	1				0	0				0	0		AB	0	0	0		50	0	0.461574	0.00947932				39	0.490521	-0.111108
Normal	AB	1	1	1				0	0				0	0		AB	0	0	0		50	0	0.991243	-0.0169029				40	0.998121	-0.00402184
Normal	AB	1	1	1				0	0				0	0		AB	0	0	0		50	0	0.23728	-0.028426				41	0.00401071	0.0333935
Normal	AB	1	1	1				0	0				0	0		AB	0	0	0		50	0	0.737001	-0.0302408				42	1	-0.0830828
Normal	AB	1	1	1				0	0				0	0		AB	0	0	0		50	0	0.261938	0.0543707				43	0.00792121	0.0702497
Normal	AB	1	1	1				0	0				0	0		AB	0	0	0		50	0	0.541543	-0.000657171				44	0.499343	0.0697273
Normal	AB	1	1	1				0	0				0	0		AB	0	0	0		50	0	0.0934281	-0.0387923				45	6.13983e-05	0.000734339
Normal	AB	1	1	1				0	0				0	0		AB	0	0	0		50	0	0.70426	0.0615881				46	1	-0.0199008
Normal	AB	1	1	1				0	0				0	0		AB	0	0	0		50	0	0.0578313	0.0178505				47	0.00356172	-0.145094
Normal	AB	1	1	1				0	0				0	0		AB	0	0	0		50	0	0.257547	0.0163703				48	0.00459734	-0.0664136
Normal	AB	1	1	1				0	0				0	0		AB	0	0	0		50	0	0.150798	-0.00729961				49	0.00246861	-0.036009
Normal	AB	1	1	1				0	0				0	0		AB	0	0	0		50	0	0.663565	0.0229646				50	0.522965	0.0297975
Normal	AB	1	1	1				0	0				0	0		AB	0	0	0		50	0	0.939978	-0.00906058				51	0.995683	0.0222516
Normal	AB	1	1	1				0	0				0	0		AB	0	0	0		50	0	0.246623	0.0185145				52	0.00223455	-0.0257508
Normal	AB	1	1	1				0	0				0	0		AB	0	0	0		50	0	0.918058	0.0237783				53	0.996601	-0.0767156
Normal	AB	1	1	1				0	0				0	0		AB	0	0	0		50	0	0.0603809	-0.0137954				54	0.00143576	-0.0336988
Normal	AB	1	1	1				0	0				0	0		AB	0	0	0		50	0	0.883318	0.0083017				55	1	0.0673014
Normal	AB	1	1	1				0	0				0	0		AB	0	0	0		50	0	0.943882	-0.00569923				56	0.998433	0.0362431
Normal	AB	1	1	1				0	0				0	0		AB	0	0	0		50	0	0.564285	-0.0195389				57	0.480461	0.019395
Normal	AB	1	1	1				0	0				0	0		AB	0	0	0		50	0	0.67616	-0.0250105				58	0.47499	0.0557086
Normal	AB	1	1	1				0	0				0	0		AB	0	0	0		50	0	0.407768	0.0168574				59	0.483143	0.114104
Normal	AB	1	1	1				0	0				0	0		AB	0	0	0		50	0	0.657681	0.0374511				60	0.537451	0.0248264
Normal	AB	1	1	1				0	0				0	0		AB	0	0	0		50	0	0.938957	-0.0298776				61	0.992967	0.138848
Normal	AB	1	1	1				0	0				0	0		AB	0	0	0		50	0	0.951614	0.00445858				62	1	-0.13744
Normal	AB	1	1	1				0	0				0	0		AB	0	0	0		50	0	0.334499	-0.0347342				63	0.534734	-0.000170779
Normal	AB	1	1	1				0	0				0	0		AB	0	0	0		50	0	0.193286	-0.0279275				64	0.00671364	0.0689987
Normal	AB	1	1	1				0	0				0	0		AB	0	0	0		50	0	0.398295	-0.0681303				65	0.56813	0.129983
Normal	AB	1	1	1				0	0				0	0		AB	0	0	0		50	0	0.162071	0.0328696				66	0.011042	-0.228875
Normal	AB	1	1	1				0	0				0	0		AB	0	0	0		50	0	0.0522501	0.0515109				67	0.00171744	-0.110485
Normal	AB	1	1	1				0	0				0	0		AB	0	0	0		50	0	0.643595	0.0624278				68	0.562428	-0.000500608
Normal	AB	1	1	1				0	0				0	0		AB	0	0	0		50	0	0.0494567	-0.0182084				69	0.00308747	0.111041
Normal	AB	1	1	1				0	0				0	0		AB	0	0	0		50	0	0.78807	0.0271232				70	1	0.0107279
Normal	AB	1	1	1				0	0				0	0		AB	0	0	0		50	0	0.839595	-0.00463343				71	0.995445	0.0416443
Normal	AB	1	1	1				0	0				0	0		AB	0	0	0		50	0	0.200331	0.0511105				72	0.000928221	0.014934
Normal	AB	1	1	1				0	0				0	0		AB	0	0	0		50	0	0.0531555	-0.0332826				73	0.0027168	0.122925
Normal	AB	1	1	1				0	0				0	0		AB	0	0	0		50	0	0.778454	-0.0682533				74	1	-0.0372916
Normal	AB	1	1	1				0	0				0	0		AB	0	0	0		50	0	0.530814	-0.00915941				75	0.490841	0.156906
Normal	AB	1	1	1				0	0				0	0		AB	0	0	0		50	0	0.780163	0.0334421				76	1	-0.0188229
Normal	AB	1	1	1				0	0				0	0		AB	0	0	0		50	0	0.500478	0.0645242				77	0.564524	-0.0224687
Normal	AB	1	1	1				0	0				0	0		AB	0	0	0		50	0	0.0577022	-0.0248196				78	0.00372319	-0.0552848
Normal	AB	1	1	1				0	0				0	0		AB	0	0	0		50	0	0.568057	0.0314961				79	0.531496	0.0965356
Normal	AB	1	1	1				0	0				0	0		AB	0	0	0		50	0	0.223665	-0.0218986				80	0.00704457	0.0996998
Normal	AB	1	1	1				0	0				0	0		AB	0	0	0		50	0	0.940596	-0.0347283				81	1	-0.0138629
Normal	AB	1	1	1				0	0				0	0		AB	0	0	0		50	0	0.854266	0.0237345				82	1	-0.151843
Normal	AB	1	1	1				0	0				0	0		AB	0	0	0		50	0	0.0439748	0.040591				83	0.00104372	0.0191102
Normal	AB	1	1	1				0	0				0	0		AB	0	0	0		50	0	0.793665	-0.0288768				84	0.993557	-0.179458
Normal	AB	1	1	1				0	0				0	0		AB	0	0	0		50	0	0.0491095	-0.0141033				85	0.00141813	-0.0981223
Normal	AB	1	1	1				0	0				0	0		AB	0	0	0		50	0	0.112832	-0.0181384				86	0.00159131	-0.0112468
Normal	AB	1	1	1				0	0				0	0		AB	0	0	0		50	0	0.664178	0.0191538				87	0.519154	-0.00912631
Normal	AB	1	1	1				0	0				0	0		AB	0	0	0		50	0	0.642093	0.00926262				88	0.509263	-0.0352122
Normal	AB	1	1	1				0	0				0	0		AB	0	0	0		50	0	0.224482	0.003378				89	0.00207929	0.0350461
Normal	AB	1	1	1				0	0				0	0		AB	0	0	0		50	0	0.124258	-0.00357149				90	0.000419743	0.00660578
Normal	AB	1	1	1				0	0				0	0		AB	0	0	0		50	0	0.211474	-0.027097				91	0.000755278	-0.00413168
Normal	AB	1	1	1				0	0				0	0		AB	0	0	0		50	0	0.896963	-0.0538162				92	1	-0.0781591
Normal	AB	1	1	1				0	0				0	0		AB	0	0	0		50	0	0.696118	-0.0376052				93	0.462395	-0.206579
Normal	AB	1	1	1				0	0				0	0		AB	0	0	0		50	0	0.468402	0.0070014				94	0.492999	-0.0348776
Normal	AB	1	1	1				0	0				0	0		AB	0	0	0		50	0	0.777657	-0.0368566				95	0.998911	0.0143704
Normal	AB	1	1	1				0	0				0	0		AB	0	0	0		50	0	0.0570014	-0.0268745				96	0.00210088	-0.105605
Normal	AB	1	1	1				0	0				0	0		AB	0	0	0		50	0	0.439164	0.0245142				97	0.475486	-0.00465895
Normal	AB	1	1	1				0	0				0	0		AB	0	0	0		50	0	0.530602	0.0321739				98	0.532174	-0.118772
Normal	AB	1	1	1				0	0				0	0		AB	0	0	0		50	0	0.520838	-0.0181252				99	0.481875	0.0607526
Normal	AB	1	1	1				0	0				0	0		AB	0	0	0		50	0	0.249946	0.0201867				100	0.00453032	-0.0696497
Normal	AB	1	1	1				0	0				0	0		AB	0	0	0		50	0	0.504032	0.00826837				101	0.508268	0.068371
Normal	AB	1	1	1				0	0				0	0		AB	0	0	0		50	0	0.427891	0.0191157				102	0.480884	0.033323
Normal	AB	1	1	1				0	0				0	0		AB	0	0	0		50	0	0.357314	0.00476146				103	0.495239	0.0591304
Normal	AB	1	1	1				0	0				0	0		AB	0	0	0		50	0	0.642443	0.00275384				104	0.502754	-0.0228978
Normal	AB	1	1	1				0	0				0	0		AB	0	0	0		50	0	0.9408	0.0087586				105	0.999482	0.00572488
Normal	AB	1	1	1				0	0				0	0		AB	0	0	0		50	0	0.70395	0.0313368				106	0.998767	-0.0261183
Normal	AB	1	1	1				0	0				0	0		AB	0	0	0		50	0	0.890869	-0.0295624				107	0.994417	-0.103893
Normal	AB	1	1	1				0	0				0	0		AB	0	0	0		50	0	0.195946	0.0443338				108	0.00579263	-0.0865734
Normal	AB	1	1	1				0	0				0	0		AB	0	0	0		50	0	0.203576	0.0257202				109	0.00902528	0.144709
Normal	AB	1	1	1				0	0				0	0		AB	0	0	0		50	0	0.982572	0.00837878				110	0.994946	-0.049775
Normal	AB	1	1	1				0	0				0	0		AB	0	0	0		50	0	0.750963	0.00568209				111	0.998742	-0.0289476
Normal	AB	1	1	1				0	0				0	0		AB	0	0	0		50	0	0.30987	0.000344344				112	0.499656	0.0151299
Normal	AB	1	1	1				0	0				0	0		AB	0	0	0		50	0	0.635256	0.0671521				113	0.567152	0.00111979
Normal	AB	1	1	1				0	0				0	0		AB	0	0	0		50	0	0.449728	-0.0620527				114	0.562053	0.230379
Normal	AB	1	1	1				0	0				0	0		AB	0	0	0		50	0	0.0228866	0.00205407				115	0.00142018	0.137151
Normal	AB	1	1	1				0	0				0	0		AB	0	0	0		50	0	0.600326	-0.0294057				116	0.470594	-0.00354568
Normal	AB	1	1	1				0	0				0	0		AB	0	0	0		50	0	0.356732	0.0171249				117	0.482875	-0.109088
Normal	AB	1	1	1				0	0				0	0		AB	0	0	0		50	0	0.593935	-0.017613				118	0.482387	-0.0675452
Normal	AB	1	1	1				0	0				0	0		AB	0	0	0		50	0	0.60627	0.041409				119	0.541409	0.0146759
Normal	AB	1	1	1				0	0				0	0		AB	0	0	0		50	0	0.863181	0.0473509				120	0.992851	-0.181929
Normal	AB	1	1	1				0	0				0	0		AB	0	0	0		50	0	0.581349	0.020597				121	0.520597	-0.0549357
Normal	AB	1	1	1				0	0				0	0		AB	0	0	0		50	0	0.431256	-0.0053593				122	0.505359	-0.0493469
Normal	AB	1	1	1				0	0				0	0		AB	0	0	0		50	0	0.99267	-0.0031558				123	1	0.0208922
Normal	AB	1	1	1				0	0				0	0		AB	0	0	0		50	0	0.730892	0.014954				124	1	0.00157295
Normal	AB	1	1	1				0	0				0	0		AB	0	0	0		50	0	0.107864	0.00372953				125	0.00161299	-0.0590571
Normal	AB	1	1	1				0	0				0	0		AB	0	0	0		50	0	0.700288	-0.0560266				126	0.999478	-0.0139885
Normal	AB	1	1	1				0	0				0	0		AB	0	0	0		50	0	0.655921	-0.0172067				127	0.482793	-0.18497
Normal	AB	1	1	1				0	0				0	0		AB	0	0	0		50	0	0.201578	0.00734638				128	0.00346848	0.00131763
Normal	AB	1	1	1				0	0				0	0		AB	0	0	0		50	0	0.936691	0.011367				129	0.998624	-0.00400964
Normal	AB	1	1	1				0	0				0	0		AB	0	0	0		50	0	0.095368	-0.000719961				130	0.00108405	-0.0330987
Normal	AB	1	1	1				0	0				0	0		AB	0	0	0		50	0	0.967912	0.00539072				131	1	-0.0012311
Normal	AB	1	1	1				0	0				0	0		AB	0	0	0		50	0	0.109936	0.0303206				132	0.000592635	0.00460468
Normal	AB	1	1	1				0	0				0	0		AB	0	0	0		50	0	0.0630696	-0.0147834				133	0.00191231	0.136702
Normal	AB	1	1	1				0	0				0	0		AB	0	0	0		50	0	0.967982	0.00570156				134	1	0.0222645
Normal	AB	1	1	1				0	0				0	0		AB	0	0	0		50	0	0.760837	0.076697				135	0.999132	0.00402541
Normal	AB	1	1	1				0	0				0	0		AB	0	0	0		50	0	0.566038	-0.00234572				136	0.497654	0.145734
Normal	AB	1	1	1				0	0				0	0		AB	0	0	0		50	0	0.863195	0.00764561				137	1	0.00296979
Normal	AB	1	1	1				0	0				0	0		AB	0	0	0		50	0	0.564675	-0.0101667				138	0.489833	0.031644
Normal	AB	1	1	1				0	0				0	0		AB	0	0	0		50	0	0.187635	0.0900155				139	0.00190764	0.0375147
Normal	AB	1	1	1				0	0				0	0		AB	0	0	0		50	0	0.570956	0.0533355				140	0.553335	0.393209
Normal	AB	1	1	1				0	0				0	0		AB	0	0	0		50	0	0.0777442	-0.0347584				141	0.00414652	-0.127279
Normal	AB	1	1	1				0	0				0	0		AB	0	0	0		50	0	0.835011	0.0247237				142	1	0.0803415
Normal	AB	1	1	1				0	0				0	0		AB	0	0	0		50	0	0.222696	-0.00117897				143	0.00550586	0.0794568
Normal	AB	1	1	1				0	0				0	0		AB	0	0	0		50	0	0.378936	-0.035973				144	0.535973	0.00113345
Normal	AB	1	1	1				0	0				0	0		AB	0	0	0		50	0	0.673328	-0.00448997				145	0.49551	-0.0284757
Normal	AB	1	1	1				0	0				0	0		AB	0	0	0		50	0	0.688935	0.0147917				146	0.514792	0.00890272
Normal	AB	1	1	1				0	0				0	0		AB	0	0	0		50	0	0.390478	-0.0144337				147	0.514434	0.00634012
Normal	AB	1	1	1				0	0				0	0		AB	0	0	0		50	0	0.777262	0.00943057				148	1	-0.0139879
Normal	AB	1	1	1				0	0				0	0		AB	0	0	0		50	0	0.266332	-0.000517406				149	0.00251166	-0.0274584
Normal	AB	1	1	1				0	0				0	0		AB	0	0	0		50	0	0.408333	0.00812133				150	0.491879	-0.000681054
Normal	AB	1	1	1				0	0				0	0		AB	0	0	0		50	0	0.756588	-0.00699188				151	0.998771	-0.0175128
Normal	AB	1	1	1				0	0				0	0		AB	0	0	0		50	0	0.795115	0.0119973				152	1	0.0180184
Normal	AB	1	1	1				0	0				0	0		AB	0	0	0		50	0	0.264834	0.0098307				153	0.0031773	-0.043192
Normal	AB	1	1	1				0	0				0	0		AB	0	0	0		50	0	0.436013	-0.0478202				154	0.54782	0.00452614
Normal	AB	1	1	1				0	0				0	0		AB	0	0	0		50	0	0.166057	-0.0126193				155	0.00794088	0.148149
Normal	AB	1	1	1				0	0				0	0		AB	0	0	0		50	0	0.128634	0.0168698				156	0.00162327	-0.0106438
Normal	AB	1	1	1				0	0				0	0		AB	0	0	0		50	0	0.227394	0.00828595				157	0.0038361	0.018551
Normal	AB	1	1	1				0	0				0	0		AB	0	0	0		50	0	0.627977	0.0711401				158	0.57114	0.0257901
Normal	AB	1	1	1				0	0				0	0		AB	0	0	0		50	0	0.849312	-0.0177886				159	0.987916	0.21437
Normal	AB	1	1	1				0	0				0	0		AB	0	0	0		50	0	0.85935	0.0163141				160	1	0.0580201
Normal	AB	1	1	1				0	0				0	0		AB	0	0	0		50	0	0.371412	0.054378				161	0.445622	-0.0336783
Normal	AB	1	1	1				0	0				0	0		AB	0	0	0		50	0	0.479665	0.0373049				162	0.462695	-0.205327
Normal	AB	1	1	1				0	0				0	0		AB	0	0	0		50	0	0.77083	0.00455731				163	0.994249	-0.162452
Normal	AB	1	1	1				0	0				0	0		AB	0	0	0		50	0	0.41658	0.0686616				164	0.431338	-0.00995527
Normal	AB	1	1	1				0	0				0	0		AB	0	0	0		50	0	0.241699	-0.0142935				165	0.0165955	0.0109524
Normal	AB	1	1	1				0	0				0	0		AB	0	0	0		50	0	0.666148	0.0179844				166	0.517984	0.0206449
Normal	AB	1	1	1				0	0				0	0		AB	0	0	0		50	0	0.297871	0.00967976				167	0.00535703	-0.0380111
Normal	AB	1	1	1				0	0				0	0		AB	0	0	0		50	0	0.991658	-0.0710604				168	0.99808	1.83866e-05
Normal	AB	1	1	1				0	0				0	0		AB	0	0	0		50	0	0.289454	0.0370294				169	0.0205687	0.317155
Normal	AB	1	1	1				0	0				0	0		AB	0	0	0		50	0	0.519564	-0.0738839				170	0.426116	0.059487
Normal	AB	1	1	1				0	0				0	0		AB	0	0	0		50	0	0.904804	-0.011048				171	1	-0.0687504
Normal	AB	1	1	1				0	0				0	0		AB	0	0	0		50	0	0.890717	-0.00507168				172	1	-0.0453844
Normal	AB	1	1	1				0	0				0	0		AB	0	0	0		50	0	0.864318	-0.0592496				173	1	0.0118197
Normal	AB	1	1	1				0	0				0	0		AB	0	0	0		50	0	0.663119	0.0564857				174	0.556486	0.237
Normal	AB	1	1	1				0	0				0	0		AB	0	0	0		50	0	0.187827	0.00517804				175	0.0106095	0.204246
Normal	AB	1	1	1				0	0				0	0		AB	0	0	0		50	0	0.832686	-0.0173128				176	0.999138	-0.0240915
Normal	AB	1	1	1				0	0				0	0		AB	0	0	0		50	0	0.526984	0.0150169				177	0.515017	0.0606194
Normal	AB	1	1	1				0	0				0	0		AB	0	0	0		50	0	0.727787	0.0407312				178	0.997814	-0.0497637
Normal	AB	1	1	1				0	0				0	0		AB	0	0	0		50	0	0.0487547	-6.70543e-05				179	0.00198584	0.106225
Normal	AB	1	1	1				0	0				0	0		AB	0	0	0		50	0	0.98763	0.0328329				180	1	-3.81617e-05
Normal	AB	1	1	1				0	0				0	0		AB	0	0	0		50	0	0.719459	0.0180818				181	0.995276	-0.0532084
Normal	AB	1	1	1				0	0				0	0		AB	0	0	0		50	0	0.750873	-0.0068781				182	0.997285	0.070784
Normal	AB	1	1	1				0	0				0	0		AB	0	0	0		50	0	0.223096	0.0149556				183	0.00153448	-0.021777
Normal	AB	1	1	1				0	0				0	0		AB	0	0	0		50	0	0.0260075	0.0169736				184	0.000388958	-0.0199574
Normal	AB	1	1	1				0	0				0	0		AB	0	0	0		50	0	0.543512	-0.015609				185	0.484391	-0.049253
Normal	AB	1	1	1				0	0				0	0		AB	0	0	0		50	0	0.964935	0.0128257				186	1	0.0409448
Normal	AB	1	1	1				0	0				0	0		AB	0	0	0		50	0	0.316859	-0.0365178				187	0.536518	-0.0311633
Normal	AB	1	1	1				0	0				0	0		AB	0	0	0		50	0	0.900602	0.0133689				188	1	0.0121203
Normal	AB	1	1	1				0	0				0	0		AB	0	0	0		50	0	0.000733295	-0.0408897				189	9.80336e-06	-0.0162337
Normal	AB	1	1	1				0	0				0	0		AB	0	0	0		50	0	0.0164621	0.0403345				190	0.000673129	0.024623
Normal	AB	1	1	1				0	0				0	0		AB	0	0	0		50	0	0.104816	0.0479104				191	0.0042277	-0.0412517
Normal	AB	1	1	1				0	0				0	0		AB	0	0	0		50	0	0.387609	-0.0067861				192	0.506786	-0.0867993
Normal	AB	1	1	1				0	0				0	0		AB	0	0	0		50	0	0.650246	-0.0120366				193	0.487963	0.00778184
Normal	AB	1	1	1				0	0				0	0		AB	0	0	0		50	0	0.0155413	0.00812475				194	0.000187065	0.0287087
Normal	AB	1	1	1				0	0				0	0		AB	0	0	0		50	0	0.436492	-0.0422797				195	0.54228	-0.0370466
Normal	AB	1	1	1				0	0				0	0		AB	0	0	0		50	0	0.82599	0.0072033				196	1	-0.154547
Normal	AB	1	1	1				0	0				0	0		AB	0	0	0		50	0	0.817375	0.0370164				197	0.998822	0.00221419
Normal	AB	1	1	1				0	0				0	0		AB	0	0	0		50	0	0.263351	-0.00691161				198	0.0097483	0.0884934
Normal	AB	1	1	1				0	0				0	0		AB	0	0	0		50	0	0.919009	0.0281241				199	1	0.012971
Normal	AB	1	1	1				0	0				0	0		AB	0	0	0		50	0	0.9205	-0.0151765				200	0.994822	0.125746
Normal	AB	1	1	1				0	0				0	0		AB	0	0	0		50	0	0.479448	-0.0252412				201	0.525241	0.0661138
Normal	AB	1	1	1				0	0				0	0		AB	0	0	0		50	0	0.237936	0.0485872				202	0.0060058	0.122388
Normal	AB	1	1	1				0	0				0	0		AB	0	0	0		50	0	0.679333	0.060571				203	0.560571	0.0767477
Normal	AB	1	1	1				0	0				0	0		AB	0	0	0		50	0	0.00806575	0.000284829				204	0.00048855	0.110537
Normal	AB	1	1	1				0	0				0	0		AB	0	0	0		50	0	0.0024434	-0.00726681				205	6.9595e-07	-0.00096814
Normal	AB	1	1	1				0	0				0	0		AB	0	0	0		50	0	0.970512	-0.0931647				206	1	0.0188963
Normal	AB	1	1	1				0	0				0	0		AB	0	0	0		50	0	0.502467	-0.0435048				207	0.456495	-0.223832
Normal	AB	1	1	1				0	0				0	0		AB	0	0	0		50	0	0.597417	-0.01322				208	0.48678	-0.00738668
Normal	AB	1	1	1				0	0				0	0		AB	0	0	0		50	0	0.100349	-0.0121354				209	0.00132661	0.0561444
Normal	AB	1	1	1				0	0				0	0		AB	0	0	0		50	0	0.0963592	0.000215534				210	0.00116936	-0.0263745
Normal	AB	1	1	1				0	0				0	0		AB	0	0	0		50	0	0.834323	0.0100029				211	0.999964	-0.000251737
Normal	AB	1	1	1				0	0				0	0		AB	0	0	0		50	0	0.793488	-0.0367585				212	0.998413	-0.0141658
Normal	AB	1	1	1				0	0				0	0		AB	0	0	0		50	0	0.34549	-0.0483243				213	0.548324	-0.120624
Normal	AB	1	1	1				0	0				0	0		AB	0	0	0		50	0	0.462542	0.00966743				214	0.490333	-0.10802
Normal	AB	1	1	1				0	0				0	0		AB	0	0	0		50	0	0.656655	0.0148238				215	0.514824	0.0409028
Normal	AB	1	1	1				0	0				0	0		AB	0	0	0		50	0	0.819252	-0.000949774				216	0.997571	-0.0428409
Normal	AB	1	1	1				0	0				0	0		AB	0	0	0		50	0	0.295167	0.0230402				217	0.000280342	-0.00451461
Normal	AB	1	1	1				0	0				0	0		AB	0	0	0		50	0	0.116328	-0.0127054				218	0.00268022	-0.0971025
Normal	AB	1	1	1				0	0				0	0		AB	0	0	0		50	0	0.408076	0.00757531				219	0.492425	-0.029872
Normal	AB	1	1	1				0	0				0	0		AB	0	0	0		50	0	0.812879	-0.0475134				220	0.998768	-0.0324479
Normal	AB	1	1	1				0	0				0	0		AB	0	0	0		50	0	0.995815	0.0254762				221	1	0.114768
Normal	AB	1	1	1				0	0				0	0		AB	0	0	0		50	0	0.436584	0.000213937				222	0.499786	0.014468
Normal	AB	1	1	1				0	0				0	0		AB	0	0	0		50	0	0.120731	0.011145				223	2.5829e-05	-0.000303368
Normal	AB	1	1	1				0	0				0	0		AB	0	0	0		50	0	0.749302	0.0612954				224	0.99833	0.0314737
Normal	AB	1	1	1				0	0				0	0		AB	0	0	0		50	0	0.962857	-0.00544155				225	0.988196	-0.269862
Normal	AB	1	1	1				0	0				0	0		AB	0	0	0		50	0	0.549519	0.0104118				226	0.510412	-0.00810534
Normal	AB	1	1	1				0	0				0	0		AB	0	0	0		50	0	0.559898	-0.0423889				227	0.457611	-0.0238377
Normal	AB	1	1	1				0	0				0	0		AB	0	0	0		50	0	0.104576	-0.0344087				228	0.00443288	0.0124413
Normal	AB	1	1	1				0	0				0	0		AB	0	0	0		50	0	0.437963	0.0297608				229	0.470239	0.106223
Normal	AB	1	1	1				0	0				0	0		AB	0	0	0		50	0	0.704352	0.050574				230	0.995808	-0.055091
Normal	AB	1	1	1				0	0				0	0		AB	0	0	0		50	0	0.422405	0.0659683				231	0.434032	0.0485197
Normal	AB	1	1	1				0	0				0	0		AB	0	0	0		50	0	0.287784	-0.00120637				232	0.0189846	0.182492
Normal	AB	1	1	1				0	0				0	0		AB	0	0	0		50	0	0.943794	-0.0342548				233	1	0.0029421
Normal	AB	1	1	1				0	0				0	0		AB	0	0	0		50	0	0.970696	-0.0402316				234	1	-0.122369
Normal	AB	1	1	1				0	0				0	0		AB	0	0	0		50	0	0.0384969	9.30004e-05				235	0.00154879	0.126198
Normal	AB	1	1	1				0	0				0	0		AB	0	0	0		50	0	0.751986	0.0259786				236	0.999986	-0.000156305
Normal	AB	1	1	1				0	0				0	0		AB	0	0	0		50	0	0.852734	-0.0623205				237	0.995569	-0.0280991
Normal	AB	1	1	1				0	0				0	0		AB	0	0	0		50	0	0.0756466	-0.00515981				238	0.00471433	0.154962
Normal	AB	1	1	1				0	0				0	0		AB	0	0	0		50	0	0.563699	-0.005692				239	0.494308	-0.000483845
Normal	AB	1	1	1				0	0				0	0		AB	0	0	0		50	0	0.932704	0.0417201				240	1	-0.00456359
Normal	AB	1	1	1				0	0				0	0		AB	0	0	0		50	0	0.357879	-0.011322				241	0.511322	-0.043868
Normal	AB	1	1	1				0	0				0	0		AB	0	0	0		50	0	0.158427	0.0407983				242	0.00179371	-0.00871385
Normal	AB	1	1	1				0	0				0	0		AB	0	0	0		50	0	0.424107	-0.0446103				243	0.54461	-0.0965124
Normal	AB	1	1	1				0	0				0	0		AB	0	0	0		50	0	0.871205	0.00181756				244	1	-0.183354
Normal	AB	1	1	1				0	0				0	0		AB	0	0	0		50	0	0.475586	0.0387801				245	0.46122	0.00672625
Normal	AB	1	1	1				0	0				0	0		AB	0	0	0		50	0	0.292094	0.0312328				246	0.0113274	0.158976
Normal	AB	1	1	1				0	0				0	0		AB	0	0	0		50	0	0.868466	-0.0369344				247	0.994575	0.085068
Normal	AB	1	1	1				0	0				0	0		AB	0	0	0		50	0	0.0726381	-0.0384822				248	0.00268285	-0.183679
Normal	AB	1	1	1				0	0				0	0		AB	0	0	0		50	0	0.594568	-0.00197881				249	0.498021	0.0806202
Normal	AB	1	1	1				0	0				0	0		AB	0	0	0		50	0	0.205328	-0.0722464				250	0.000406305	0.00158011
Normal	AB	1	1	1				0	0				0	0		AB	0	0	0		50	0	0.0803673	-0.0934631				251	0.00580624	0.24903
Normal	AB	1	1	1				0	0				0	0		AB	0	0	0		50	0	0.313104	-0.0371455				252	0.537146	0.317601
Normal	AB	1	1	1				0	0				0	0		AB	0	0	0		50	0	0.678608	0.0614696				253	0.56147	0.128968
Normal	AB	1	1	1				0	0				0	0		AB	0	0	0		50	0	0.623921	0.0157095				254	0.51571	0.129966
Normal	AB	1	1	1				0	0				0	0		AB	0	0	0		50	0	0.52047	-0.0411289				255	0.458871	0.0417111
Normal	AB	1	1	1				0	0				0	0		AB	0	0	0		50	0	0.27959	-0.0135823				256	0.0114992	0.166968
Normal	AB	1	1	1				0	0				0	0		AB	0	0	0		50	0	0.70493	0.0172097				257	1	0.0479257
Normal	AB	1	1	1				0	0				0	0		AB	0	0	0		50	0	0.821916	0.0625825				258	0.997171	-0.0236465
Normal	AB	1	1	1				0	0				0	0		AB	0	0	0		50	0	0.766124	-0.0153269				259	0.990411	-0.123153
Normal	AB	1	1	1				0	0				0	0		AB	0	0	0		50	0	0.051112	0.028016				260	0.000783388	0.00656315
Normal	AB	1	1	1				0	0				0	0		AB	0	0	0		50	0	0.525211	-0.00660589				261	0.493394	-0.0242164
Normal	AB	1	1	1				0	0				0	0		AB	0	0	0		50	0	0.510396	0.0658456				262	0.565846	-0.0222789
Normal	AB	1	1	1				0	0				0	0		AB	0	0	0		50	0	0.544562	-0.0290847				263	0.470915	0.244819
Normal	AB	1	1	1				0	0				0	0		AB	0	0	0		50	0	0.57537	-0.00735127				264	0.492649	-0.109273
Normal	AB	1	1	1				0	0				0	0		AB	0	0	0		50	0	0.136278	-2.30258e-05				265	0.00100182	0.0340008
Normal	AB	1	1	1				0	0				0	0		AB	0	0	0		50	0	0.0699568	0.0396168				266	1.61081e-06	4.16089e-07
Normal	AB	1	1	1				0	0				0	0		AB	0	0	0		50	0	0.577789	0.0037369				267	0.503737	-0.164982
Normal	AB	1	1	1				0	0				0	0		AB	0	0	0		50	0	0.419887	-0.028109				268	0.528109	-0.0016963
Normal	AB	1	1	1				0	0				0	0		AB	0	0	0		50	0	0.863118	0.00178921				269	1	-0.0745942
Normal	AB	1	1	1				0	0				0	0		AB	0	0	0		50	0	0.400069	0.0384909				270	0.461509	0.00875217
Normal	AB	1	1	1				0	0				0	0		AB	0	0	0		50	0	0.246564	0.0168412				271	0.00949047	-0.129786
Normal	AB	1	1	1				0	0				0	0		AB	0	0	0		50	0	0.042242	0.030117				272	0.000711407	-0.0331063
Normal	AB	1	1	1				0	0				0	0		AB	0	0	0		50	0	0.695039	0.0482219				273	0.548222	-0.0391784
Normal	AB	1	1	1				0	0				0	0		AB	0	0	0		50	0	0.193962	-0.0252474				274	0.00935321	0.127086
Normal	AB	1	1	1				0	0				0	0		AB	0	0	0		50	0	0.73846	-0.0359451				275	1	-0.0777591
Normal	AB	1	1	1				0	0				0	0		AB	0	0	0		50	0	0.29858	-0.027837				276	0.0107325	-0.124374
Normal	AB	1	1	1				0	0				0	0		AB	0	0	0		50	0	0.337649	0.0102263				277	0.489774	-0.117419
Normal	AB	1	1	1				0	0				0	0		AB	0	0	0		50	0	0.0770638	-0.0237137				278	0.000788074	-0.0326496
Normal	AB	1	1	1				0	0				0	0		AB	0	0	0		50	0	0.335268	0.0348306				279	0.465169	-0.0614368
Normal	AB	1	1	1				0	0				0	0		AB	0	0	0		50	0	0.522007	0.00668961				280	0.50669	0.0599813
Normal	AB	1	1	1				0	0				0	0		AB	0	0	0		50	0	0.44878	0.0099089				281	0.490091	-0.00111522
Normal	AB	1	1	1				0	0				0	0		AB	0	0	0		50	0	0.803179	0.0158432				282	0.998408	-0.0427251
Normal	AB	1	1	1				0	0				0	0		AB	0	0	0		50	0	0.113308	-0.0174598				283	0.00179517	0.0784982
Normal	AB	1	1	1				0	0				0	0		AB	0	0	0		50	0	0.30489	-0.0259872				284	0.525987	0.0287548
Normal	AB	1	1	1				0	0				0	0		AB	0	0	0		50	0	0.70512	-0.0328904				285	1	0.064213
Normal	AB	1	1	1				0	0				0	0		AB	0	0	0		50	0	0.140502	-0.0119204				286	0.00462118	0.0464656
Normal	AB	1	1	1				0	0				0	0		AB	0	0	0		50	0	0.0780071	0.00422866				287	0.000929878	0.0427691
Normal	AB	1	1	1				0	0				0	0		AB	0	0	0		50	0	0.757234	-0.0196494				288	0.99936	-0.00528008
Normal	AB	1	1	1				0	0				0	0		AB	0	0	0		50	0	0.238459	-0.0198432				289	0.00468557	0.0883307
Normal	AB	1	1	1				0	0				0	0		AB	0	0	0		50	0	0.177007	0.0595583				290	0.00351238	0.0562337
Normal	AB	1	1	1				0	0				0	0		AB	0	0	0		50	0	0.110802	-0.00567634				291	0.00659916	-0.114677
Normal	AB	1	1	1				0	0				0	0		AB	0	0	0		50	0	0.879099	-0.0491929				292	1	0.0120554
Normal	AB	1	1	1				0	0				0	0		AB	0	0	0		50	0	0.429366	0.0218793				293	0.478121	-0.0086945
Normal	AB	1	1	1				0	0				0	0		AB	0	0	0		50	0	0.688472	0.00953876				294	0.509539	-0.0597795
Normal	AB	1	1	1				0	0				0	0		AB	0	0	0		50	0	0.91482	-0.0220325				295	0.998255	0.0459824
Normal	AB	1	1	1				0	0				0	0		AB	0	0	0		50	0	0.80755	0.00822778				296	1	-0.0775715
Normal	AB	1	1	1				0	0				0	0		AB	0	0	0		50	0	0.40284	-9.33377e-05				297	0.500093	0.0306765
Normal	AB	1	1	1				0	0				0	0		AB	0	0	0		50	0	0.937653	0.0359112				298	1	-0.000225139
Normal	AB	1	1	1				0	0				0	0		AB	0	0	0		50	0	0.768739	0.0312271				299	0.994479	0.106245
Normal	AB	1	1	1				0	0				0	0		AB	0	0	0		50	0	0.0926272	-0.00430372				300	0.00289248	-0.144084
Normal	AB	1	1	1				0	0				0	0		AB	0	0	0		50	0	0.965554	-0.00612805				301	1	0.0127978
Normal	AB	1	1	1				0	0				0	0		AB	0	0	0		50	0	0.625367	0.0421188				302	0.542119	0.0205901
Normal	AB	1	1	1				0	0				0	0		AB	0	0	0		50	0	0.764259	-0.0133633				303	0.993562	0.00226006
Normal	AB	1	1	1				0	0				0	0		AB	0	0	0		50	0	0.64871	0.00249865				304	0.502499	-0.0377665
Normal	AB	1	1	1				0	0				0	0		AB	0	0	0		50	0	0.781858	0.0140803				305	0.999609	-0.00362353
Normal	AB	1	1	1				0	0				0	0		AB	0	0	0		50	0	0.700496	0.025764				306	0.998027	-0.0586781
Normal	AB	1	1	1				0	0				0	0		AB	0	0	0		50	0	0.757886	-0.0391782				307	0.996095	0.0597534
Normal	AB	1	1	1				0	0				0	0		AB	0	0	0		50	0	0.562086	0.00983854				308	0.509839	0.0138398
Normal	AB	1	1	1				0	0				0	0		AB	0	0	0		50	0	0.351118	-0.00891307				309	0.508913	0.0178005
Normal	AB	1	1	1				0	0				0	0		AB	0	0	0		50	0	0.276946	-0.0575367				310	0.00246844	0.0209458
Normal	AB	1	1	1				0	0				0	0		AB	0	0	0		50	0	0.34266	-0.0118104				311	0.51181	0.016379
Normal	AB	1	1	1				0	0				0	0		AB	0	0	0		50	0	0.0318542	0.0860818				312	0.000376211	-0.0526709
Normal	AB	1	1	1				0	0				0	0		AB	0	0	0		50	0	0.643363	0.000561292				313	0.500561	0.219584
Normal	AB	1	1	1				0	0				0	0		AB	0	0	0		50	0	0.652721	0.0337677				314	0.533768	-0.00146195
Normal	AB	1	1	1				0	0				0	0		AB	0	0	0		50	0	0.38542	0.0229781				315	0.477022	-0.147003
Normal	AB	1	1	1				0	0				0	0		AB	0	0	0		50	0	0.759105	-0.0274315				316	0.996511	-0.110862
Normal	AB	1	1	1				0	0				0	0		AB	0	0	0		50	0	0.615017	0.000948564				317	0.500949	0.0990971
Normal	AB	1	1	1				0	0				0	0		AB	0	0	0		50	0	0.241204	0.0453443				318	0.000228797	-0.00100744
Normal	AB	1	1	1				0	0				0	0		AB	0	0	0		50	0	0.765711	0.0099924				319	0.993056	0.0817816
Normal	AB	1	1	1				0	0				0	0		AB	0	0	0		50	0	0.979756	-0.0168494				320	0.998042	0.0134843
Normal	AB	1	1	1				0	0				0	0		AB	0	0	0		50	0	0.941597	0.0061794				321	1	-0.0164515
Normal	AB	1	1	1				0	0				0	0		AB	0	0	0		50	0	0.862827	0.0417307				322	0.998934	0.012097
Normal	AB	1	1	1				0	0				0	0		AB	0	0	0		50	0	0.18663	-0.00832755				323	0.00778818	0.104188
Normal	AB	1	1	1				0	0				0	0		AB	0	0	0		50	0	0.722275	0.0675635				324	1	-0.039792
Normal	AB	1	1	1				0	0				0	0		AB	0	0	0		50	0	0.23944	-0.0167998				325	0.0161774	0.149195
Normal	AB	1	1	1				0	0				0	0		AB	0	0	0		50	0	0.688603	0.00203595				326	0.502036	0.0508065
Normal	AB	1	1	1				0	0				0	0		AB	0	0	0		50	0	0.993874	-0.0226719				327	0.999595	-0.0099957
Normal	AB	1	1	1				0	0				0	0		AB	0	0	0		50	0	0.117725	-0.0397707				328	0.00266904	0.0391716
Normal	AB	1	1	1				0	0				0	0		AB	0	0	0		50	0	0.164279	0.0054878				329	0.0065335	-0.0657826
Normal	AB	1	1	1				0	0				0	0		AB	0	0	0		50	0	0.0131801	0.0175287				330	7.23295e-05	-0.0196878
Normal	AB	1	1	1				0	0				0	0		AB	0	0	0		50	0	0.950892	0.0034436				331	0.996666	-0.0124173
Normal	AB	1	1	1				0	0				0	0		AB	0	0	0		50	0	0.72628	-0.0107763				332	0.9995	0.0171136
Normal	AB	1	1	1				0	0				0	0		AB	0	0	0		50	0	0.907604	0.0101628				333	1	-0.0170896
Normal	AB	1	1	1				0	0				0	0		AB	0	0	0		50	0	0.428956	0.0666928				334	0.433307	0.0206651
Normal	AB	1	1	1				0	0				0	0		AB	0	0	0		50	0	0.464784	-0.0239259				335	0.523926	0.195002
Normal	AB	1	1	1				0	0				0	0		AB	0	0	0		50	0	0.0489957	-0.0365934				336	0.00117226	0.113537
Normal	AB	1	1	1				0	0				0	0		AB	0	0	0		50	0	0.354035	-0.00125422				337	0.501254	-0.04193
Normal	AB	1	1	1				0	0				0	0		AB	0	0	0		50	0	0.000696681	0.0538758				338	8.73792e-07	0.000892231
Normal	AB	1	1	1				0	0				0	0		AB	0	0	0		50	0	0.0963144	0.0777095				339	0.00518901	-0.0320629
Normal	AB	1	1	1				0	0				0	0		AB	0	0	0		50	0	0.995979	0.0313361				340	0.984521	-0.136258
Normal	AB	1	1	1				0	0				0	0		AB	0	0	0		50	0	0.993817	-0.000512848				341	0.993772	0.110057
Normal	AB	1	1	1				0	0				0	0		AB	0	0	0		50	0	0.00666258	0.013253				342	3.41689e-06	-0.000780949
Normal	AB	1	1	1				0	0				0	0		AB	0	0	0		50	0	0.698651	-0.000608677				343	0.499391	0.0231068
Normal	AB	1	1	1				0	0				0	0		AB	0	0	0		50	0	0.894762	-0.0131458				344	1	-0.0023919
Normal	AB	1	1	1				0	0				0	0		AB	0	0	0		50	0	0.177339	0.0831381				345	0.00233127	-0.0341654
Normal	AB	1	1	1				0	0				0	0		AB	0	0	0		50	0	0.157965	-0.010336				346	0.0131329	-0.276978
Normal	AB	1	1	1				0	0				0	0		AB	0	0	0		50	0	0.275735	0.00884885				347	0.00284999	0.0349473
Normal	AB	1	1	1				0	0				0	0		AB	0	0	0		50	0	0.436086	-0.00138204				348	0.501382	0.0266449
Normal	AB	1	1	1				0	0				0	0		AB	0	0	0		50	0	0.0065478	0.000615139				349	9.04931e-06	-0.000790306
Normal	AB	1	1	1				0	0				0	0		AB	0	0	0		50	0	0.393157	0.0533883				350	0.446612	0.000997276
Normal	AB	1	1	1				0	0				0	0		AB	0	0	0		50	0	0.0688285	0.0102481				351	0.00367463	-0.119322
Normal	AB	1	1	1				0	0				0	0		AB	0	0	0		50	0	0.729192	-0.0731051				352	0.998505	0.0316666
Normal	AB	1	1	1				0	0				0	0		AB	0	0	0		50	0	0.472434	0.0278605				353	0.47214	0.076434
Normal	AB	1	1	1				0	0				0	0		AB	0	0	0		50	0	0.760184	-0.0145233				354	0.995764	0.114447
Normal	AB	1	1	1				0	0				0	0		AB	0	0	0		50	0	0.8709	0.00540084				355	1	0.0104637
Normal	AB	1	1	1				0	0				0	0		AB	0	0	0		50	0	0.307428	-0.00631858				356	0.506319	-0.019815
Normal	AB	1	1	1				0	0				0	0		AB	0	0	0		50	0	0.937048	0.00425173				357	1	-0.0216198
Normal	AB	1	1	1				0	0				0	0		AB	0	0	0		50	0	0.131453	0.0219475				358	0.000558902	-0.0125074
Normal	AB	1	1	1				0	0				0	0		AB	0	0	0		50	0	0.139807	-0.0343274				359	0.0030684	0.0436059
Normal	AB	1	1	1				0	0				0	0		AB	0	0	0		50	0	0.156565	0.0195052				360	0.00537447	0.0387749
Normal	AB	1	1	1				0	0				0	0		AB	0	0	0		50	0	0.864222	-0.0229852				361	0.996629	-0.00535603
Normal	AB	1	1	1				0	0				0	0		AB	0	0	0		50	0	0.534664	-0.00687886				362	0.493121	0.0270747
Normal	AB	1	1	1				0	0				0	0		AB	0	0	0		50	0	0.928619	-0.0185756				363	1	0.02855
Normal	AB	1	1	1				0	0				0	0		AB	0	0	0		50	0	0.052755	0.0340823				364	0.000979956	-0.0607992
Normal	AB	1	1	1				0	0				0	0		AB	0	0	0		50	0	0.0435031	-0.0276982				365	0.00148269	-0.00491565
Normal	AB	1	1	1				0	0				0	0		AB	0	0	0		50	0	0.683121	0.0339163				366	0.533916	-0.0891525
Normal	AB	1	1	1				0	0				0	0		AB	0	0	0		50	0	0.29412	-0.00837506				367	0.00997548	0.0953759
Normal	AB	1	1	1				0	0				0	0		AB	0	0	0		50	0	0.306254	-0.0186719				368	0.518672	-0.0365664
Normal	AB	1	1	1				0	0				0	0		AB	0	0	0		50	0	0.101021	0.0547316				369	0.00188625	0.000595183
Normal	AB	1	1	1				0	0				0	0		AB	0	0	0		50	0	0.900782	0.0127164				370	0.99014	-0.194801
Normal	AB	1	1	1				0	0				0	0		AB	0	0	0		50	0	0.704546	-0.00122009				371	0.998208	-0.0463432
Normal	AB	1	1	1				0	0				0	0		AB	0	0	0		50	0	0.092253	-0.0498572				372	0.000112557	-0.00551075
Normal	AB	1	1	1				0	0				0	0		AB	0	0	0		50	0	0.415047	0.00814955				373	0.49185	-0.23955
Normal	AB	1	1	1				0	0				0	0		AB	0	0	0		50	0	0.577634	-0.0107652				374	0.489235	0.0203748
Normal	AB	1	1	1				0	0				0	0		AB	0	0	0		50	0	0.371652	-0.0154343				375	0.515434	0.0205398
Normal	AB	1	1	1				0	0				0	0		AB	0	0	0		50	0	0.726719	-0.00477713				376	1	0.0592522
Normal	AB	1	1	1				0	0				0	0		AB	0	0	0		50	0	0.901371	0.0108398				377	1	0.0109996
Normal	AB	1	1	1				0	0				0	0		AB	0	0	0		50	0	0.658985	-0.0278417				378	0.472158	0.0420152
Normal	AB	1	1	1				0	0				0	0		AB	0	0	0		50	0	0.699178	0.041474				379	0.541474	-0.0335941
Normal	AB	1	1	1				0	0				0	0		AB	0	0	0		50	0	0.977494	-0.0674137				380	0.991892	-0.181772
Normal	AB	1	1	1				0	0				0	0		AB	0	0	0		50	0	0.680921	-2.11267e-05				381	0.499979	-0.0338603
Normal	AB	1	1	1				0	0				0	0		AB	0	0	0		50	0	0.598491	0.00911497				382	0.509115	4.08243e-05
Normal	AB	1	1	1				0	0				0	0		AB	0	0	0		50	0	0.989449	-0.0258951				383	0.998196	0.0227816
Normal	AB	1	1	1				0	0				0	0		AB	0	0	0		50	0	0.00144816	0.0748884				384	3.75001e-05	-0.0284224
Normal	AB	1	1	1				0	0				0	0		AB	0	0	0		50	0	0.570492	-0.00261246				385	0.497388	-0.0527329
Normal	AB	1	1	1				0	0				0	0		AB	0	0	0		50	0	0.732127	0.0121816				386	1	-0.00170137
Normal	AB	1	1	1				0	0				0	0		AB	0	0	0		50	0	0.305789	-0.0481313				387	0.548131	-0.0169467
Normal	AB	1	1	1				0	0				0	0		AB	0	0	0		50	0	0.642172	-0.0553831				388	0.444617	0.114019
Normal	AB	1	1	1				0	0				0	0		AB	0	0	0		50	0	0.50658	-0.000876919				389	0.499123	0.199352
Normal	AB	1	1	1				0	0				0	0		AB	0	0	0		50	0	0.654336	-0.0300656				390	0.469934	-0.00321522
Normal	AB	1	1	1				0	0				0	0		AB	0	0	0		50	0	0.463832	0.00763823				391	0.492362	-0.137934
Normal	AB	1	1	1				0	0				0	0		AB	0	0	0		50	0	0.172433	-0.0646731				392	0.00131709	0.0119586
Normal	AB	1	1	1				0	0				0	0		AB	0	0	0		50	0	0.644711	0.00960788				393	0.509608	-0.192747
Normal	AB	1	1	1				0	0				0	0		AB	0	0	0		50	0	0.384631	0.0571707				394	0.442829	-0.0401237
Normal	AB	1	1	1				0	0				0	0		AB	0	0	0		50	0	0.590896	-0.0241404				395	0.47586	0.130353
Normal	AB	1	1	1				0	0				0	0		AB	0	0	0		50	0	0.740331	0.0437522				396	1	0.0157226
Normal	AB	1	1	1				0	0				0	0		AB	0	0	0		50	0	0.394881	-0.0594914				397	0.559491	-0.0264006
Normal	AB	1	1	1				0	0				0	0		AB	0	0	0		50	0	0.532006	-0.0114057				398	0.488594	0.160345
Normal	AB	1	1	1				0	0				0	0		AB	0	0	0		50	0	0.432433	-0.00755526				399	0.507555	-0.0206185
Normal	AB	1	1	1				0	0				0	0		AB	0	0	0		50	0	0.918851	0.0233726				400	1	0.0303798
Normal	AB	1	1	1				0	0				0	0		AB	0	0	0		50	0	0.283299	-0.00839695				401	0.00662145	-0.0191088
Normal	AB	1	1	1				0	0				0	0		AB	0	0	0		50	0	0.301181	-0.0137274				402	0.513727	0.00216817
Normal	AB	1	1	1				0	0				0	0		AB	0	0	0		50	0	0.890881	-0.0586855				403	1	0.046508
Normal	AB	1	1	1				0	0				0	0		AB	0	0	0		50	0	0.811017	0.0011181				404	1	0.0978059
Normal	AB	1	1	1				0	0				0	0		AB	0	0	0		50	0	0.357181	0.00438854				405	0.495611	0.00312779
Normal	AB	1	1	1				0	0				0	0		AB	0	0	0		50	0	0.74732	0.067473				406	0.999344	0.00585435
Normal	AB	1	1	1				0	0				0	0		AB	0	0	0		50	0	0.360342	-0.0276997				407	0.5277	-0.33284
Normal	AB	1	1	1				0	0				0	0		AB	0	0	0		50	0	0.272882	0.0158581				408	0.00755875	0.0838182
Normal	AB	1	1	1				0	0				0	0		AB	0	0	0		50	0	0.719321	-0.0576947				409	0.997719	-0.0142695
Normal	AB	1	1	1				0	0				0	0		AB	0	0	0		50	0	0.548438	-0.0189473				410	0.481053	-0.227983
Normal	AB	1	1	1				0	0				0	0		AB	0	0	0		50	0	0.098604	-0.0781109				411	0.00186828	0.0911943
Normal	AB	1	1	1				0	0				0	0		AB	0	0	0		50	0	0.0249045	-0.0220669				412	0.00194531	-0.136863
Normal	AB	1	1	1				0	0				0	0		AB	0	0	0		50	0	0.833234	0.0443686				413	1	-0.0907157
Normal	AB	1	1	1				0	0				0	0		AB	0	0	0		50	0	0.245052	0.0551872				414	0.0108726	-0.0620269
Normal	AB	1	1	1				0	0				0	0		AB	0	0	0		50	0	0.154263	0.0740306				415	0.00851333	0.109488
Normal	AB	1	1	1				0	0				0	0		AB	0	0	0		50	0	0.518706	0.019708				416	0.519708	0.154204
Normal	AB	1	1	1				0	0				0	0		AB	0	0	0		50	0	0.723276	-0.0373459				417	0.997149	-0.098281
Normal	AB	1	1	1				0	0				0	0		AB	0	0	0		50	0	0.0153663	0.0375057				418	0.000573867	-0.152022
Normal	AB	1	1	1				0	0				0	0		AB	0	0	0		50	0	0.400469	-0.0273836				419	0.527384	-0.0518082
Normal	AB	1	1	1				0	0				0	0		AB	0	0	0		50	0	0.372966	4.92209e-06				420	0.499995	0.0674881
Normal	AB	1	1	1				0	0				0	0		AB	0	0	0		50	0	0.395167	-0.00236733				421	0.502367	-3.50841e-06
Normal	AB	1	1	1				0	0				0	0		AB	0	0	0		50	0	0.182927	-0.0526145				422	0.000433049	-0.00302817
Normal	AB	1	1	1				0	0				0	0		AB	0	0	0		50	0	0.763023	0.0187623				423	1	0.11841
Normal	AB	1	1	1				0	0				0	0		AB	0	0	0		50	0	0.844104	-0.0221079				424	0.996833	0.00974069
Normal	AB	1	1	1				0	0				0	0		AB	0	0	0		50	0	0.928331	-0.00941819				425	1	-0.0360233
Normal	AB	1	1	1				0	0				0	0		AB	0	0	0		50	0	0.12845	-0.0546708				426	0.00120976	-0.0403814
Normal	AB	1	1	1				0	0				0	0		AB	0	0	0		50	0	0.749032	-0.00410389				427	1	-0.068556
Normal	AB	1	1	1				0	0				0	0		AB	0	0	0		50	0	0.308702	0.0457687				428	0.454231	-0.00484061
Normal	AB	1	1	1				0	0				0	0		AB	0	0	0		50	0	0.376536	0.0328676				429	0.467132	-0.165141
Normal	AB	1	1	1				0	0				0	0		AB	0	0	0		50	0	0.73644	0.0309797				430	0.995159	0.0900616
Normal	AB	1	1	1				0	0				0	0		AB	0	0	0		50	0	0.66216	-0.0249518				431	0.475048	0.0705762
Normal	AB	1	1	1				0	0				0	0		AB	0	0	0		50	0	0.709583	-0.0336521				432	1	0.0605589
Normal	AB	1	1	1				0	0				0	0		AB	0	0	0		50	0	0.0736601	0.0475883				433	0.00247882	0.0207337
Normal	AB	1	1	1				0	0				0	0		AB	0	0	0		50	0	0.422862	-0.0297059				434	0.529706	-0.0302962
Normal	AB	1	1	1				0	0				0	0		AB	0	0	0		50	0	0.649119	-0.000906578				435	0.499093	-0.135869
Normal	AB	1	1	1				0	0				0	0		AB	0	0	0		50	0	0.947282	0.0486429				436	1	0.00434837
Normal	AB	1	1	1				0	0				0	0		AB	0	0	0		50	0	0.233452	0.0774473				437	0.0113558	-0.20702
Normal	AB	1	1	1				0	0				0	0		AB	0	0	0		50	0	0.80217	-0.0157472				438	0.987575	-0.273336
Normal	AB	1	1	1				0	0				0	0		AB	0	0	0		50	0	0.466422	0.0228176				439	0.477182	-0.0456936
Normal	AB	1	1	1				0	0				0	0		AB	0	0	0		50	0	0.603963	0.0113305				440	0.51133	0.0580574
Normal	AB	1	1	1				0	0				0	0		AB	0	0	0		50	0	0.156694	-0.0327004				441	0.00177542	0.0204132
Normal	AB	1	1	1				0	0				0	0		AB	0	0	0		50	0	0.207544	0.0161961				442	0.00678679	0.145858
Normal	AB	1	1	1				0	0				0	0		AB	0	0	0		50	0	0.879857	0.0348459				443	0.99715	-0.016263
Normal	AB	1	1	1				0	0				0	0		AB	0	0	0		50	0	0.149622	0.00215887				444	0.0052137	0.0588265
Normal	AB	1	1	1				0	0				0	0		AB	0	0	0		50	0	0.139	-0.00651697				445	0.000300082	-0.00483907
Normal	AB	1	1	1				0	0				0	0		AB	0	0	0		50	0	0.0742335	0.0113226				446	0.000483778	-0.0210774
Normal	AB	1	1	1				0	0				0	0		AB	0	0	0		50	0	0.903098	-0.00226749				447	0.997955	-0.030068
Normal	AB	1	1	1				0	0				0	0		AB	0	0	0		50	0	0.968636	-0.0228056				448	1	-0.00367371
Normal	AB	1	1	1				0	0				0	0		AB	0	0	0		50	0	0.548902	0.0250341				449	0.525034	-0.0799288
Normal	AB	1	1	1				0	0				0	0		AB	0	0	0		50	0	0.410661	-0.0228567				450	0.522857	0.110561
Normal	AB	1	1	1				0	0				0	0		AB	0	0	0		50	0	0.0237064	-0.0254787				451	0.00054185	-0.0700766
Normal	AB	1	1	1				0	0				0	0		AB	0	0	0		50	0	0.205112	0.022311				452	0.005226	0.0752678
Normal	AB	1	1	1				0	0				0	0		AB	0	0	0		50	0	0.449609	0.0128167				453	0.487183	0.039692
Normal	AB	1	1	1				0	0				0	0		AB	0	0	0		50	0	0.607832	0.0357027				454	0.535703	-0.0315947
Normal	AB	1	1	1				0	0				0	0		AB	0	0	0		50	0	0.379821	0.00938245				455	0.490618	0.0828734
Normal	AB	1	1	1				0	0				0	0		AB	0	0	0		50	0	0.912364	-0.0359861				456	0.998288	0.0424018
Normal	AB	1	1	1				0	0				0	0		AB	0	0	0		50	0	0.507107	-0.0907653				457	0.409235	-0.0543035
Normal	AB	1	1	1				0	0				0	0		AB	0	0	0		50	0	0.982182	-0.0295756				458	1	0.349946
Normal	AB	1	1	1				0	0				0	0		AB	0	0	0		50	0	0.0895945	0.0417841				459	0.00264981	0.0192857
Normal	AB	1	1	1				0	0				0	0		AB	0	0	0		50	0	0.269106	0.00211345				460	0.0112444	0.169885
Normal	AB	1	1	1				0	0				0	0		AB	0	0	0		50	0	0.696771	0.0106246				461	0.510625	0.00967237
Normal	AB	1	1	1				0	0				0	0		AB	0	0	0		50	0	0.365419	-0.00266582				462	0.502666	-0.0356835
Normal	AB	1	1	1				0	0				0	0		AB	0	0	0		50	0	0.615087	0.052617				463	0.552617	0.00306373
Normal	AB	1	1	1				0	0				0	0		AB	0	0	0		50	0	0.637257	-0.00288789				464	0.497112	-0.170138
Normal	AB	1	1	1				0	0				0	0		AB	0	0	0		50	0	0.00670184	-0.0438258				465	1.93542e-05	-0.00333354
Normal	AB	1	1	1				0	0				0	0		AB	0	0	0		50	0	0.599472	0.0104205				466	0.51042	-0.120083
Normal	AB	1	1	1				0	0				0	0		AB	0	0	0		50	0	0.150787	-0.0151755				467	0.00157127	0.0157816
Normal	AB	1	1	1				0	0				0	0		AB	0	0	0		50	0	0.858404	0.0661822				468	1	-0.0162993
Normal	AB	1	1	1				0	0				0	0		AB	0	0	0		50	0	0.942285	0.0556968				469	0.987527	0.204109
Normal	AB	1	1	1				0	0				0	0		AB	0	0	0		50	0	0.626112	-0.0319516				470	0.468048	-0.0187206
Normal	AB	1	1	1				0	0				0	0		AB	0	0	0		50	0	0.585015	-0.0252285				471	0.474771	-0.14158
Normal	AB	1	1	1				0	0				0	0		AB	0	0	0		50	0	0.954343	0.0220797				472	1	-0.0702645
Normal	AB	1	1	1				0	0				0	0		AB	0	0	0		50	0	0.432368	-0.00207968				473	0.50208	-0.00168605
Normal	AB	1	1	1				0	0				0	0		AB	0	0	0		50	0	0.353932	0.00818465				474	0.491815	0.00417614
Normal	AB	1	1	1				0	0				0	0		AB	0	0	0		50	0	0.237296	0.0583792				475	0.00194219	0.0372096
Normal	AB	1	1	1				0	0				0	0		AB	0	0	0		50	0	0.74493	0.0154403				476	0.991302	-0.235139
Normal	AB	1	1	1				0	0				0	0		AB	0	0	0		50	0	0.843165	-0.00520012				477	0.997396	-0.0190652
Normal	AB	1	1	1				0	0				0	0		AB	0	0	0		50	0	0.604307	0.0176316				478	0.517632	0.0229803
Normal	AB	1	1	1				0	0				0	0		AB	0	0	0		50	0	0.923683	-0.0371109				479	0.996743	0.0734254
Normal	AB	1	1	1				0	0				0	0		AB	0	0	0		50	0	0.406687	-0.0228069				480	0.522807	-0.0879716
Normal	AB	1	1	1				0	0				0	0		AB	0	0	0		50	0	0.168263	0.0285015				481	0.00383756	0.0144026
Normal	AB	1	1	1				0	0				0	0		AB	0	0	0		50	0	0.851112	0.00218024				482	0.995148	-0.0566868
Normal	AB	1	1	1				0	0				0	0		AB	0	0	0		50	0	0.178186	-0.0726719				483	0.000388488	0.00194554
Normal	AB	1	1	1				0	0				0	0		AB	0	0	0		50	0	0.034344	0.00404246				484	0.00249584	-0.00705632
Normal	AB	1	1	1				0	0				0	0		AB	0	0	0		50	0	0.970095	0.00742756				485	0.999216	-0.0132197
Normal	AB	1	1	1				0	0				0	0		AB	0	0	0		50	0	0.847647	0.022393				486	0.998741	0.0362066
Normal	AB	1	1	1				0	0				0	0		AB	0	0	0		50	0	0.384277	0.0138601				487	0.48614	0.081693
Normal	AB	1	1	1				0	0				0	0		AB	0	0	0		50	0	0.365634	0.0183228				488	0.481677	-0.0506302
Normal	AB	1	1	1				0	0				0	0		AB	0	0	0		50	0	0.815115	-0.00435978				489	0.997013	0.057402
Normal	AB	1	1	1				0	0				0	0		AB	0	0	0		50	0	0.267188	0.000416409				490	0.00116488	0.00737922
Normal	AB	1	1	1				0	0				0	0		AB	0	0	0		50	0	0.744191	0.0314318				491	0.999938	0.00153306
Normal	AB	1	1	1				0	0				0	0		AB	0	0	0		50	0	0.184413	-0.00995671				492	0.00579643	-0.12125
Normal	AB	1	1	1				0	0				0	0		AB	0	0	0		50	0	0.315214	0.000276259				493	0.499724	-0.0193334
Normal	AB	1	1	1				0	0				0	0		AB	0	0	0		50	0	0.0472719	-0.00203501				494	1.30593e-05	0.000216732
Normal	AB	1	1	1				0	0				0	0		AB	0	0	0		50	0	0.261438	0.0135727				495	0.000532029	0.00352321
Normal	AB	1	1	1				0	0				0	0		AB	0	0	0		50	0	0.434752	-0.0515356				496	0.551536	0.0364115
Normal	AB	1	1	1				0	0				0	0		AB	0	0	0		50	0	0.462956	0.0499342				497	0.450066	-0.22076
Normal	AB	1	1	1				0	0				0	0		AB	0	0	0		50	0	0.33114	-0.028407				498	0.528407	-0.137016
AMP	AAB	1	2	1				0	0				0	0		AB	0	0	0		66.6667	0.352183	0.122528	0.00806553				499	0.00348066	0.303456
AMP	AAB	1	2	1				0	0				0	0		AB	0	0	0		66.6667	0.352183	0.783655	0.0114177				500	0.998736	0.359261
AMP	AAB	1	2	1				0	0				0	0		AB	0	0	0		66.6667	0.352183	0.597304	-0.0200077				501	0.646659	0.307528
AMP	AAB	1	2	1				0	0				0	0		AB	0	0	0		66.6667	0.352183	0.696857	-0.00584778				502	0.660819	0.423708
AMP	AAB	1	2	1				0	0				0	0		AB	0	0	0		66.6667	0.352183	0.636776	0.0304595				503	0.697126	0.323007
AMP	AAB	1	2	1				0	0				0	0		AB	0	0	0		66.6667	0.352183	0.172394	-0.0341783				504	0.00525105	0.504309
AMP	AAB	1	2	1				0	0				0	0		AB	0	0	0		66.6667	0.352183	0.978315	-0.00690272				505	1	0.400508
AMP	AAB	1	2	1				0	0				0	0		AB	0	0	0		66.6667	0.352183	0.715297	-0.0202895				506	1	0.365839
AMP	AAB	1	2	1				0	0				0	0		AB	0	0	0		66.6667	0.352183	0.601633	-0.00300516				507	0.663662	0.301384
AMP	AAB	1	2	1				0	0				0	0		AB	0	0	0		66.6667	0.352183	0.706747	-0.0869831				508	1	0.344285
AMP	AAB	1	2	1				0	0				0	0		AB	0	0	0		66.6667	0.352183	0.215274	-0.0700677				509	0.0187252	0.646428
AMP	AAB	1	2	1				0	0				0	0		AB	0	0	0		66.6667	0.352183	0.534489	0.00839454				510	0.675061	0.274771
AMP	AAB	1	2	1				0	0				0	0		AB	0	0	0		66.6667	0.352183	0.114771	-0.0475371				511	0.000963452	0.344568
AMP	AAB	1	2	1				0	0				0	0		AB	0	0	0		66.6667	0.352183	0.301401	-0.00252193				512	0.335855	0.457263
AMP	AAB	1	2	1				0	0				0	0		AB	0	0	0		66.6667	0.352183	0.919622	0.00478707				513	1	0.362795
AMP	AAB	1	2	1				0	0				0	0		AB	0	0	0		66.6667	0.352183	0.11934	0.0192536				514	0.000571289	0.329318
AMP	AAB	1	2	1				0	0				0	0		AB	0	0	0		66.6667	0.352183	0.197785	-0.00220146				515	0.00380807	0.361285
AMP	AAB	1	2	1				0	0				0	0		AB	0	0	0		66.6667	0.352183	0.549797	-0.0750969				516	0.59157	0.358848
AMP	AAB	1	2	1				0	0				0	0		AB	0	0	0		66.6667	0.352183	0.707213	-0.000239752				517	1	0.388066
AMP	AAB	1	2	1				0	0				0	0		AB	0	0	0		66.6667	0.352183	0.0448045	-0.00115214				518	1.0742e-05	0.352398
AMP	AAB	1	2	1				0	0				0	0		AB	0	0	0		66.6667	0.352183	0.982377	-0.0535343				519	1	0.35555
AMP	AAB	1	2	1				0	0				0	0		AB	0	0	0		66.6667	0.352183	0.0515869	0.0267374				520	0.00276166	0.476735
AMP	AAB	1	2	1				0	0				0	0		AB	0	0	0		66.6667	0.352183	0.158483	-0.0512829				521	0.00423743	0.375777
AMP	AAB	1	2	1				0	0				0	0		AB	0	0	0		66.6667	0.352183	0.415497	-0.0294214				522	0.362755	0.295068
AMP	AAB	1	2	1				0	0				0	0		AB	0	0	0		66.6667	0.352183	0.635487	0.0571785				523	0.723845	0.219641
AMP	AAB	1	2	1				0	0				0	0		AB	0	0	0		66.6667	0.352183	0.640395	0.0516255				524	0.718292	0.0776774
AMP	AAB	1	2	1				0	0				0	0		AB	0	0	0		66.6667	0.352183	0.460296	-0.00978851				525	0.343122	0.418156
AMP	AAB	1	2	1				0	0				0	0		AB	0	0	0		66.6667	0.352183	0.187275	-0.0331683				526	0.00183314	0.329293
AMP	AAB	1	2	1				0	0				0	0		AB	0	0	0		66.6667	0.352183	0.512216	0.00279849				527	0.669465	0.277544
AMP	AAB	1	2	1				0	0				0	0		AB	0	0	0		66.6667	0.352183	0.267825	0.0762736				528	0.000749505	0.339393
AMP	AAB	1	2	1				0	0				0	0		AB	0	0	0		66.6667	0.352183	0.541024	-0.00636149				529	0.660305	0.530522
AMP	AAB	1	2	1				0	0				0	0		AB	0	0	0		66.6667	0.352183	0.58424	-0.0265648				530	0.640102	0.36414
AMP	AAB	1	2	1				0	0				0	0		AB	0	0	0		66.6667	0.352183	0.488336	-0.0255124				531	0.358846	0.396381
AMP	AAB	1	2	1				0	0				0	0		AB	0	0	0		66.6667	0.352183	0.174743	-0.0425904				532	0.00445813	0.411443
AMP	AAB	1	2	1				0	0				0	0		AB	0	0	0		66.6667	0.352183	0.388701	-0.0279536				533	0.361287	0.313175
AMP	AAB	1	2	1				0	0				0	0		AB	0	0	0		66.6667	0.352183	0.497087	0.0255883				534	0.307745	0.350083
AMP	AAB	1	2	1				0	0				0	0		AB	0	0	0		66.6667	0.352183	0.80648	0.00181221				535	0.995873	0.329576
AMP	AAB	1	2	1				0	0				0	0		AB	0	0	0		66.6667	0.352183	0.923607	0.00316894				536	0.999665	0.359813
AMP	AAB	1	2	1				0	0				0	0		AB	0	0	0		66.6667	0.352183	0.0266696	-0.00206253				537	8.45144e-05	0.359489
AMP	AAB	1	2	1				0	0				0	0		AB	0	0	0		66.6667	0.352183	0.841076	0.0289749				538	1	0.36116
AMP	AAB	1	2	1				0	0				0	0		AB	0	0	0		66.6667	0.352183	0.552478	-0.00551613				539	0.661151	0.287256
AMP	AAB	1	2	1				0	0				0	0		AB	0	0	0		66.6667	0.352183	0.686828	0.00328153				540	0.669948	0.333898
AMP	AAB	1	2	1				0	0				0	0		AB	0	0	0		66.6667	0.352183	0.128348	0.0111378				541	0.000421179	0.368189
AMP	AAB	1	2	1				0	0				0	0		AB	0	0	0		66.6667	0.352183	0.892101	-0.00103495				542	0.998013	0.388099
AMP	AAB	1	2	1				0	0				0	0		AB	0	0	0		66.6667	0.352183	0.916335	0.0351172				543	1	0.350823
AMP	AAB	1	2	1				0	0				0	0		AB	0	0	0		66.6667	0.352183	0.887626	0.0467822				544	0.993766	0.347329
AMP	AAB	1	2	1				0	0				0	0		AB	0	0	0		66.6667	0.352183	0.40152	0.0335798				545	0.299754	0.526078
AMP	AAB	1	2	1				0	0				0	0		AB	0	0	0		66.6667	0.352183	0.452135	-0.014377				546	0.34771	0.409265
AMP	AAB	1	2	1				0	0				0	0		AB	0	0	0		66.6667	0.352183	0.673779	2.08911e-05				547	0.666688	0.384189
AMP	AAB	1	2	1				0	0				0	0		AB	0	0	0		66.6667	0.352183	0.53428	0.000381136				548	0.667048	0.352093
AMP	AAB	1	2	1				0	0				0	0		AB	0	0	0		66.6667	0.352183	0.437896	-0.00726531				549	0.340599	0.35127
AMP	AAB	1	2	1				0	0				0	0		AB	0	0	0		66.6667	0.352183	0.778137	0.0625474				550	1	0.343014
AMP	AAB	1	2	1				0	0				0	0		AB	0	0	0		66.6667	0.352183	0.342602	0.0104375				551	0.322896	0.640075
AMP	AAB	1	2	1				0	0				0	0		AB	0	0	0		66.6667	0.352183	0.558466	-0.00894344				552	0.657723	0.368875
AMP	AAB	1	2	1				0	0				0	0		AB	0	0	0		66.6667	0.352183	0.390798	0.0815754				553	0.251758	0.307981
AMP	AAB	1	2	1				0	0				0	0		AB	0	0	0		66.6667	0.352183	0.148404	-0.0027635				554	0.0121061	0.277961
AMP	AAB	1	2	1				0	0				0	0		AB	0	0	0		66.6667	0.352183	0.416151	-0.0212089				555	0.354542	0.354693
AMP	AAB	1	2	1				0	0				0	0		AB	0	0	0		66.6667	0.352183	0.159872	-0.00180834				556	0.0033907	0.433961
AMP	AAB	1	2	1				0	0				0	0		AB	0	0	0		66.6667	0.352183	0.898733	0.00607207				557	1	0.346023
AMP	AAB	1	2	1				0	0				0	0		AB	0	0	0		66.6667	0.352183	0.285544	0.0142281				558	0.00173384	0.339761
AMP	AAB	1	2	1				0	0				0	0		AB	0	0	0		66.6667	0.352183	0.98695	0.0548987				559	0.997192	0.317421
AMP	AAB	1	2	1				0	0				0	0		AB	0	0	0		66.6667	0.352183	0.16666	0.0137725				560	0.00914941	0.571942
AMP	AAB	1	2	1				0	0				0	0		AB	0	0	0		66.6667	0.352183	0.861173	-0.0637847				561	0.997628	0.401348
AMP	AAB	1	2	1				0	0				0	0		AB	0	0	0		66.6667	0.352183	0.715112	-0.0404862				562	1	0.559573
AMP	AAB	1	2	1				0	0				0	0		AB	0	0	0		66.6667	0.352183	0.547774	-0.0186886				563	0.647978	0.174403
AMP	AAB	1	2	1				0	0				0	0		AB	0	0	0		66.6667	0.352183	0.923942	-0.052546				564	1	0.373951
AMP	AAB	1	2	1				0	0				0	0		AB	0	0	0		66.6667	0.352183	0.462287	-0.0148271				565	0.34816	0.55683
AMP	AAB	1	2	1				0	0				0	0		AB	0	0	0		66.6667	0.352183	0.233347	-0.0636836				566	0.00345987	0.374954
AMP	AAB	1	2	1				0	0				0	0		AB	0	0	0		66.6667	0.352183	0.844666	-0.00457255				567	1	0.622084
AMP	AAB	1	2	1				0	0				0	0		AB	0	0	0		66.6667	0.352183	0.262821	-0.00957332				568	0.00120176	0.34601
AMP	AAB	1	2	1				0	0				0	0		AB	0	0	0		66.6667	0.352183	0.603896	0.000573833				569	0.66724	0.328822
AMP	AAB	1	2	1				0	0				0	0		AB	0	0	0		66.6667	0.352183	0.983881	0.0759814				570	0.999887	0.353632
AMP	AAB	1	2	1				0	0				0	0		AB	0	0	0		66.6667	0.352183	0.493473	-0.0379326				571	0.371266	0.0365702
AMP	AAB	1	2	1				0	0				0	0		AB	0	0	0		66.6667	0.352183	0.523205	0.00100471				572	0.667671	0.466288
AMP	AAB	1	2	1				0	0				0	0		AB	0	0	0		66.6667	0.352183	0.22708	-0.0272931				573	0.000228149	0.356751
AMP	AAB	1	2	1				0	0				0	0		AB	0	0	0		66.6667	0.352183	0.853911	-0.0210284				574	1	0.449162
AMP	AAB	1	2	1				0	0				0	0		AB	0	0	0		66.6667	0.352183	0.355993	-0.0221353				575	0.355469	0.446223
AMP	AAB	1	2	1				0	0				0	0		AB	0	0	0		66.6667	0.352183	0.96702	-0.0640426				576	1	0.323269
AMP	AAB	1	2	1				0	0				0	0		AB	0	0	0		66.6667	0.352183	0.608438	-0.0124697				577	0.654197	0.105101
AMP	AAB	1	2	1				0	0				0	0		AB	0	0	0		66.6667	0.352183	0.460788	-0.0239566				578	0.35729	0.306846
AMP	AAB	1	2	1				0	0				0	0		AB	0	0	0		66.6667	0.352183	0.189116	0.0570292				579	0.00453057	0.350167
AMP	AAB	1	2	1				0	0				0	0		AB	0	0	0		66.6667	0.352183	0.650101	0.00282694				580	0.669494	0.41298
AMP	AAB	1	2	1				0	0				0	0		AB	0	0	0		66.6667	0.352183	0.891884	-0.0592829				581	0.999496	0.356091
AMP	AAB	1	2	1				0	0				0	0		AB	0	0	0		66.6667	0.352183	0.819777	-0.0124876				582	1	0.113609
AMP	AAB	1	2	1				0	0				0	0		AB	0	0	0		66.6667	0.352183	0.154935	0.0592809				583	0.00193477	0.371112
AMP	AAB	1	2	1				0	0				0	0		AB	0	0	0		66.6667	0.352183	0.412284	-0.0312067				584	0.36454	0.154524
AMP	AAB	1	2	1				0	0				0	0		AB	0	0	0		66.6667	0.352183	0.624567	0.00475715				585	0.671424	0.412623
AMP	AAB	1	2	1				0	0				0	0		AB	0	0	0		66.6667	0.352183	0.98021	-0.0412131				586	0.999067	0.359553
AMP	AAB	1	2	1				0	0				0	0		AB	0	0	0		66.6667	0.352183	0.0599373	-0.00853074				587	0.0024702	0.55892
AMP	AAB	1	2	1				0	0				0	0		AB	0	0	0		66.6667	0.352183	0.690205	0.0235488				588	0.690215	0.319889
AMP	AAB	1	2	1				0	0				0	0		AB	0	0	0		66.6667	0.352183	0.832838	0.0357016				589	0.996078	0.385721
AMP	AAB	1	2	1				0	0				0	0		AB	0	0	0		66.6667	0.352183	0.0937128	0.0221842				590	0.00334569	0.442771
AMP	AAB	1	2	1				0	0				0	0		AB	0	0	0		66.6667	0.352183	0.747413	-0.00329568				591	0.996684	0.35306
AMP	AAB	1	2	1				0	0				0	0		AB	0	0	0		66.6667	0.352183	0.403595	-0.0525105				592	0.385844	0.337461
AMP	AAB	1	2	1				0	0				0	0		AB	0	0	0		66.6667	0.352183	0.790132	-0.00981351				593	1	0.164239
AMP	AAB	1	2	1				0	0				0	0		AB	0	0	0		66.6667	0.352183	0.210046	-0.0416829				594	0.00206128	0.355344
AMP	AAB	1	2	1				0	0				0	0		AB	0	0	0		66.6667	0.352183	0.910784	0.0149093				595	1	0.527918
AMP	AAB	1	2	1				0	0				0	0		AB	0	0	0		66.6667	0.352183	0.307467	-0.00709143				596	0.340425	0.418766
AMP	AAB	1	2	1				0	0				0	0		AB	0	0	0		66.6667	0.352183	0.629906	0.0167807				597	0.683447	0.385675
AMP	AAB	1	2	1				0	0				0	0		AB	0	0	0		66.6667	0.352183	0.995199	-0.0246339				598	0.99666	0.280226
AMP	AAB	1	2	1				0	0				0	0		AB	0	0	0		66.6667	0.352183	0.56722	0.00710693				599	0.673774	0.328638
AMP	AAB	1	2	1				0	0				0	0		AB	0	0	0		66.6667	0.352183	0.325814	-0.00957913				600	0.342912	0.384437
AMP	AAB	1	2	1				0	0				0	0		AB	0	0	0		66.6667	0.352183	0.295799	-0.00112987				601	0.0028335	0.376293
AMP	AAB	1	2	1				0	0				0	0		AB	0	0	0		66.6667	0.352183	0.749807	-0.0192772				602	1	0.349874
AMP	AAB	1	2	1				0	0				0	0		AB	0	0	0		66.6667	0.352183	0.212157	0.0025595				603	0.0040898	0.418473
AMP	AAB	1	2	1				0	0				0	0		AB	0	0	0		66.6667	0.352183	0.109682	-0.0289443				604	0.00028073	0.356024
AMP	AAB	1	2	1				0	0				0	0		AB	0	0	0		66.6667	0.352183	0.788152	-0.00284439				605	1	0.464172
AMP	AAB	1	2	1				0	0				0	0		AB	0	0	0		66.6667	0.352183	0.215654	-0.00743778				606	0.000613404	0.361837
AMP	AAB	1	2	1				0	0				0	0		AB	0	0	0		66.6667	0.352183	0.112879	-0.00502204				607	0.000839569	0.352002
AMP	AAB	1	2	1				0	0				0	0		AB	0	0	0		66.6667	0.352183	0.87288	-0.0403849				608	1	0.350205
AMP	AAB	1	2	1				0	0				0	0		AB	0	0	0		66.6667	0.352183	0.960536	0.0240982				609	1	0.190917
AMP	AAB	1	2	1				0	0				0	0		AB	0	0	0		66.6667	0.352183	0.566544	-0.014507				610	0.65216	0.43869
AMP	AAB	1	2	1				0	0				0	0		AB	0	0	0		66.6667	0.352183	0.364337	1.05642e-05				611	0.333323	0.379284
AMP	AAB	1	2	1				0	0				0	0		AB	0	0	0		66.6667	0.352183	0.28103	-0.0432394				612	2.96885e-06	0.352199
AMP	AAB	1	2	1				0	0				0	0		AB	0	0	0		66.6667	0.352183	0.657886	0.0257351				613	0.692402	0.55669
AMP	AAB	1	2	1				0	0				0	0		AB	0	0	0		66.6667	0.352183	0.646047	-0.0235057				614	0.643161	0.376212
AMP	AAB	1	2	1				0	0				0	0		AB	0	0	0		66.6667	0.352183	0.295105	0.0351692				615	0.00693665	0.450639
AMP	AAB	1	2	1				0	0				0	0		AB	0	0	0		66.6667	0.352183	0.500469	-0.0698742				616	0.596792	0.254703
AMP	AAB	1	2	1				0	0				0	0		AB	0	0	0		66.6667	0.352183	0.545171	-0.0375928				617	0.629074	0.194175
AMP	AAB	1	2	1				0	0				0	0		AB	0	0	0		66.6667	0.352183	0.396003	-0.0158721				618	0.349205	0.346348
AMP	AAB	1	2	1				0	0				0	0		AB	0	0	0		66.6667	0.352183	0.969163	-0.00204608				619	1	0.417974
AMP	AAB	1	2	1				0	0				0	0		AB	0	0	0		66.6667	0.352183	0.913749	-0.00211672				620	1	0.349096
AMP	AAB	1	2	1				0	0				0	0		AB	0	0	0		66.6667	0.352183	0.840604	0.0171398				621	1	0.353786
AMP	AAB	1	2	1				0	0				0	0		AB	0	0	0		66.6667	0.352183	0.891245	-0.00545012				622	0.996945	0.331244
AMP	AAB	1	2	1				0	0				0	0		AB	0	0	0		66.6667	0.352183	0.718753	-0.0465056				623	1	0.364008
AMP	AAB	1	2	1				0	0				0	0		AB	0	0	0		66.6667	0.352183	0.530776	-0.0114546				624	0.655212	0.437253
AMP	AAB	1	2	1				0	0				0	0		AB	0	0	0		66.6667	0.352183	0.403876	-0.000312638				625	0.333646	0.364147
AMP	AAB	1	2	1				0	0				0	0		AB	0	0	0		66.6667	0.352183	0.874693	0.0228889				626	1	0.351292
AMP	AAB	1	2	1				0	0				0	0		AB	0	0	0		66.6667	0.352183	0.742653	0.000868287				627	0.9966	0.257904
AMP	AAB	1	2	1				0	0				0	0		AB	0	0	0		66.6667	0.352183	0.750759	0.0505193				628	0.99987	0.352314
AMP	AAB	1	2	1				0	0				0	0		AB	0	0	0		66.6667	0.352183	0.810634	0.00747237				629	0.991809	0.405838
AMP	AAB	1	2	1				0	0				0	0		AB	0	0	0		66.6667	0.352183	0.117674	0.0107922				630	0.000879306	0.324652
AMP	AAB	1	2	1				0	0				0	0		AB	0	0	0		66.6667	0.352183	0.815403	0.0222409				631	0.99824	0.308804
AMP	AAB	1	2	1				0	0				0	0		AB	0	0	0		66.6667	0.352183	0.724104	-0.0115816				632	0.996779	0.40634
AMP	AAB	1	2	1				0	0				0	0		AB	0	0	0		66.6667	0.352183	0.744626	0.0492144				633	1	0.321068
AMP	AAB	1	2	1				0	0				0	0		AB	0	0	0		66.6667	0.352183	0.297019	-0.00294409				634	0.0146176	0.227423
AMP	AAB	1	2	1				0	0				0	0		AB	0	0	0		66.6667	0.352183	0.09636	-0.0126959				635	0.000283692	0.349494
AMP	AAB	1	2	1				0	0				0	0		AB	0	0	0		66.6667	0.352183	0.260587	0.0159009				636	0.00330839	0.328454
AMP	AAB	1	2	1				0	0				0	0		AB	0	0	0		66.6667	0.352183	0.297729	-0.0104911				637	0.00473415	0.292554
AMP	AAB	1	2	1				0	0				0	0		AB	0	0	0		66.6667	0.352183	0.509349	0.0162933				638	0.68296	0.342189
AMP	AAB	1	2	1				0	0				0	0		AB	0	0	0		66.6667	0.352183	0.81673	-0.0520579				639	0.997339	0.303815
AMP	AAB	1	2	1				0	0				0	0		AB	0	0	0		66.6667	0.352183	0.66712	-0.0315924				640	0.635074	0.342201
AMP	AAB	1	2	1				0	0				0	0		AB	0	0	0		66.6667	0.352183	0.355065	-0.0122744				641	0.345608	0.331507
AMP	AAB	1	2	1				0	0				0	0		AB	0	0	0		66.6667	0.352183	0.255395	0.00234081				642	0.00313483	0.360726
AMP	AAB	1	2	1				0	0				0	0		AB	0	0	0		66.6667	0.352183	0.520058	0.0138549				643	0.680522	0.351009
AMP	AAB	1	2	1				0	0				0	0		AB	0	0	0		66.6667	0.352183	0.709885	-0.0579464				644	0.998033	0.372271
AMP	AAB	1	2	1				0	0				0	0		AB	0	0	0		66.6667	0.352183	0.113178	-0.0476632				645	0.00655827	0.446448
AMP	AAB	1	2	1				0	0				0	0		AB	0	0	0		66.6667	0.352183	0.163253	-0.011885				646	0.00778116	0.358451
AMP	AAB	1	2	1				0	0				0	0		AB	0	0	0		66.6667	0.352183	0.150619	0.0303958				647	0.0017901	0.379036
AMP	AAB	1	2	1				0	0				0	0		AB	0	0	0		66.6667	0.352183	0.697835	-0.0463414				648	0.620325	0.457708
AMP	AAB	1	2	1				0	0				0	0		AB	0	0	0		66.6667	0.352183	0.703405	0.0686565				649	1	0.354933
AMP	AAB	1	2	1				0	0				0	0		AB	0	0	0		66.6667	0.352183	0.545437	-0.00190678				650	0.66476	0.369247
AMP	AAB	1	2	1				0	0				0	0		AB	0	0	0		66.6667	0.352183	0.698778	-0.00779001				651	0.658877	0.343777
AMP	AAB	1	2	1				0	0				0	0		AB	0	0	0		66.6667	0.352183	0.910361	-0.0261044				652	1	0.387552
AMP	AAB	1	2	1				0	0				0	0		AB	0	0	0		66.6667	0.352183	0.05689	-0.0271894				653	0.00148508	0.25198
AMP	AAB	1	2	1				0	0				0	0		AB	0	0	0		66.6667	0.352183	0.52219	-0.0142189				654	0.652448	0.237676
AMP	AAB	1	2	1				0	0				0	0		AB	0	0	0		66.6667	0.352183	0.281549	0.0302445				655	0.00400332	0.345164
AMP	AAB	1	2	1				0	0				0	0		AB	0	0	0		66.6667	0.352183	0.410537	-0.00194651				656	0.33528	0.495304
AMP	AAB	1	2	1				0	0				0	0		AB	0	0	0		66.6667	0.352183	0.456855	0.0095891				657	0.323744	0.343598
AMP	AAB	1	2	1				0	0				0	0		AB	0	0	0		66.6667	0.352183	0.620038	0.0235529				658	0.69022	0.39982
AMP	AAB	1	2	1				0	0				0	0		AB	0	0	0		66.6667	0.352183	0.52178	-0.0274022				659	0.639264	0.415568
AMP	AAB	1	2	1				0	0				0	0		AB	0	0	0		66.6667	0.352183	0.0573549	-0.025764				660	0.00157165	0.317105
AMP	AAB	1	2	1				0	0				0	0		AB	0	0	0		66.6667	0.352183	0.75909	-0.00175105				661	1	0.266794
AMP	AAB	1	2	1				0	0				0	0		AB	0	0	0		66.6667	0.352183	0.721719	0.0524461				662	1	0.350836
AMP	AAB	1	2	1				0	0				0	0		AB	0	0	0		66.6667	0.352183	0.14531	0.018297				663	0.00762092	0.497171
AMP	AAB	1	2	1				0	0				0	0		AB	0	0	0		66.6667	0.352183	0.80297	-0.0820436				664	0.997062	0.307803
AMP	AAB	1	2	1				0	0				0	0		AB	0	0	0		66.6667	0.352183	0.400462	0.0663889				665	0.266944	0.655118
AMP	AAB	1	2	1				0	0				0	0		AB	0	0	0		66.6667	0.352183	0.308473	-0.0477249				666	0.381058	0.234675
AMP	AAB	1	2	1				0	0				0	0		AB	0	0	0		66.6667	0.352183	0.568552	0.0232898				667	0.689956	0.537618
AMP	AAB	1	2	1				0	0				0	0		AB	0	0	0		66.6667	0.352183	0.139328	-0.00187099				668	0.00324492	0.273175
AMP	AAB	1	2	1				0	0				0	0		AB	0	0	0		66.6667	0.352183	0.556099	0.00896641				669	0.675633	0.350988
AMP	AAB	1	2	1				0	0				0	0		AB	0	0	0		66.6667	0.352183	0.194873	0.0410445				670	0.00174731	0.312548
AMP	AAB	1	2	1				0	0				0	0		AB	0	0	0		66.6667	0.352183	0.503918	0.00472224				671	0.671389	0.349224
AMP	AAB	1	2	1				0	0				0	0		AB	0	0	0		66.6667	0.352183	0.588836	0.0139387				672	0.680605	0.341135
AMP	AAB	1	2	1				0	0				0	0		AB	0	0	0		66.6667	0.352183	0.806685	-0.0171999				673	0.997751	0.387738
AMP	AAB	1	2	1				0	0				0	0		AB	0	0	0		66.6667	0.352183	0.637621	-0.0142698				674	0.652397	0.408487
AMP	AAB	1	2	1				0	0				0	0		AB	0	0	0		66.6667	0.352183	0.90881	-0.00335381				675	1	0.353649
AMP	AAB	1	2	1				0	0				0	0		AB	0	0	0		66.6667	0.352183	0.794259	-0.0104877				676	1	0.342953
AMP	AAB	1	2	1				0	0				0	0		AB	0	0	0		66.6667	0.352183	0.764263	0.000838984				677	1	0.306004
AMP	AAB	1	2	1				0	0				0	0		AB	0	0	0		66.6667	0.352183	0.249373	-0.0410179				678	0.00020922	0.354102
AMP	AAB	1	2	1				0	0				0	0		AB	0	0	0		66.6667	0.352183	0.96753	0.0624923				679	1	0.394959
AMP	AAB	1	2	1				0	0				0	0		AB	0	0	0		66.6667	0.352183	0.263551	0.00152797				680	0.0164699	0.19385
AMP	AAB	1	2	1				0	0				0	0		AB	0	0	0		66.6667	0.352183	0.350228	-0.021554				681	0.354887	0.34536
AMP	AAB	1	2	1				0	0				0	0		AB	0	0	0		66.6667	0.352183	0.438688	-0.0198594				682	0.353193	0.30297
AMP	AAB	1	2	1				0	0				0	0		AB	0	0	0		66.6667	0.352183	0.116304	-0.000160901				683	0.00230973	0.44969
AMP	AAB	1	2	1				0	0				0	0		AB	0	0	0		66.6667	0.352183	0.616682	-0.0062385				684	0.660428	0.352213
AMP	AAB	1	2	1				0	0				0	0		AB	0	0	0		66.6667	0.352183	0.613827	-0.0147813				685	0.651885	0.34051
AMP	AAB	1	2	1				0	0				0	0		AB	0	0	0		66.6667	0.352183	0.335837	0.00131634				686	0.332017	0.369079
AMP	AAB	1	2	1				0	0				0	0		AB	0	0	0		66.6667	0.352183	0.395746	0.020926				687	0.312407	0.358242
AMP	AAB	1	2	1				0	0				0	0		AB	0	0	0		66.6667	0.352183	0.0693892	0.0194956				688	0.00145204	0.285121
AMP	AAB	1	2	1				0	0				0	0		AB	0	0	0		66.6667	0.352183	0.567772	-0.0534851				689	0.613182	0.334108
AMP	AAB	1	2	1				0	0				0	0		AB	0	0	0		66.6667	0.352183	0.228648	-0.0130495				690	0.0122293	0.532793
AMP	AAB	1	2	1				0	0				0	0		AB	0	0	0		66.6667	0.352183	0.635094	-0.0179951				691	0.648672	0.387621
AMP	AAB	1	2	1				0	0				0	0		AB	0	0	0		66.6667	0.352183	0.295019	0.0447157				692	0.00530891	0.265209
AMP	AAB	1	2	1				0	0				0	0		AB	0	0	0		66.6667	0.352183	0.196413	0.0146179				693	0.00878274	0.529561
AMP	AAB	1	2	1				0	0				0	0		AB	0	0	0		66.6667	0.352183	0.00198525	-0.0116339				694	2.90203e-05	0.303804
AMP	AAB	1	2	1				0	0				0	0		AB	0	0	0		66.6667	0.352183	0.448398	0.0369879				695	0.296345	0.333128
AMP	AAB	1	2	1				0	0				0	0		AB	0	0	0		66.6667	0.352183	0.71066	-0.0146515				696	0.994743	0.233064
AMP	AAB	1	2	1				0	0				0	0		AB	0	0	0		66.6667	0.352183	0.755179	0.0636163				697	1	0.291353
AMP	AAB	1	2	1				0	0				0	0		AB	0	0	0		66.6667	0.352183	0.0626939	-0.0529668				698	0.00398836	0.136397
AMP	AAB	1	2	1				0	0				0	0		AB	0	0	0		66.6667	0.352183	0.136786	0.0133317				699	0.0072451	0.487537
AMP	AAB	1	2	1				0	0				0	0		AB	0	0	0		66.6667	0.352183	0.234649	-0.000391461				700	0.00312827	0.345069
AMP	AAB	1	2	1				0	0				0	0		AB	0	0	0		66.6667	0.352183	0.673243	-0.0134247				701	0.653242	0.350971
AMP	AAB	1	2	1				0	0				0	0		AB	0	0	0		66.6667	0.352183	0.176825	0.0706646				702	0.00237382	0.340227
AMP	AAB	1	2	1				0	0				0	0		AB	0	0	0		66.6667	0.352183	0.374362	-0.0286931				703	0.362026	0.524191
AMP	AAB	1	2	1				0	0				0	0		AB	0	0	0		66.6667	0.352183	0.844534	-0.0161616				704	1	0.303567
AMP	AAB	1	2	1				0	0				0	0		AB	0	0	0		66.6667	0.352183	0.514415	0.0881969				705	0.754864	0.378233
AMP	AAB	1	2	1				0	0				0	0		AB	0	0	0		66.6667	0.352183	0.484951	-0.0790441				706	0.412377	0.441082
AMP	AAB	1	2	1				0	0				0	0		AB	0	0	0		66.6667	0.352183	0.753899	-0.0443767				707	1	0.339082
AMP	AAB	1	2	1				0	0				0	0		AB	0	0	0		66.6667	0.352183	0.504156	-0.02341				708	0.643257	0.17431
AMP	AAB	1	2	1				0	0				0	0		AB	0	0	0		66.6667	0.352183	0.370163	-0.000934621				709	0.334268	0.322768
AMP	AAB	1	2	1				0	0				0	0		AB	0	0	0		66.6667	0.352183	0.7761	0.0100864				710	1	0.355176
AMP	AAB	1	2	1				0	0				0	0		AB	0	0	0		66.6667	0.352183	0.83141	-0.0299107				711	0.998323	0.37988
AMP	AAB	1	2	1				0	0				0	0		AB	0	0	0		66.6667	0.352183	0.196944	0.0363744				712	0.00589073	0.27488
AMP	AAB	1	2	1				0	0				0	0		AB	0	0	0		66.6667	0.352183	0.383781	-0.0118323				713	0.345166	0.311535
AMP	AAB	1	2	1				0	0				0	0		AB	0	0	0		66.6667	0.352183	0.500189	-0.0713949				714	0.595272	0.3484
AMP	AAB	1	2	1				0	0				0	0		AB	0	0	0		66.6667	0.352183	0.150301	0.0209835				715	0.0107307	0.385912
AMP	AAB	1	2	1				0	0				0	0		AB	0	0	0		66.6667	0.352183	0.75989	-0.0112583				716	0.996811	0.332625
AMP	AAB	1	2	1				0	0				0	0		AB	0	0	0		66.6667	0.352183	0.19554	-0.0109997				717	0.00220145	0.402448
AMP	AAB	1	2	1				0	0				0	0		AB	0	0	0		66.6667	0.352183	0.945843	-0.0348465				718	1	0.404767
AMP	AAB	1	2	1				0	0				0	0		AB	0	0	0		66.6667	0.352183	0.911988	-0.00791067				719	1	0.359837
AMP	AAB	1	2	1				0	0				0	0		AB	0	0	0		66.6667	0.352183	0.796563	0.0583253				720	1	0.323287
AMP	AAB	1	2	1				0	0				0	0		AB	0	0	0		66.6667	0.352183	0.532473	-0.0653121				721	0.601355	0.383155
AMP	AAB	1	2	1				0	0				0	0		AB	0	0	0		66.6667	0.352183	0.365769	0.00616747				722	0.327166	0.349224
AMP	AAB	1	2	1				0	0				0	0		AB	0	0	0		66.6667	0.352183	0.288138	0.0207149				723	0.00177708	0.373176
AMP	AAB	1	2	1				0	0				0	0		AB	0	0	0		66.6667	0.352183	0.12896	-0.030666				724	0.00267139	0.385298
AMP	AAB	1	2	1				0	0				0	0		AB	0	0	0		66.6667	0.352183	0.328474	0.0604338				725	0.2729	0.325802
AMP	AAB	1	2	1				0	0				0	0		AB	0	0	0		66.6667	0.352183	0.536526	0.00817068				726	0.674837	0.452425
AMP	AAB	1	2	1				0	0				0	0		AB	0	0	0		66.6667	0.352183	0.535076	0.0639637				727	0.73063	0.320844
AMP	AAB	1	2	1				0	0				0	0		AB	0	0	0		66.6667	0.352183	0.681857	0.000150206				728	0.666817	0.249354
AMP	AAB	1	2	1				0	0				0	0		AB	0	0	0		66.6667	0.352183	0.77578	-0.0032192				729	0.999977	0.352846
AMP	AAB	1	2	1				0	0				0	0		AB	0	0	0		66.6667	0.352183	0.898417	0.00116278				730	1	0.347495
AMP	AAB	1	2	1				0	0				0	0		AB	0	0	0		66.6667	0.352183	0.909465	-0.000107493				731	0.999788	0.357315
AMP	AAB	1	2	1				0	0				0	0		AB	0	0	0		66.6667	0.352183	0.678545	0.00103565				732	0.667702	0.351747
AMP	AAB	1	2	1				0	0				0	0		AB	0	0	0		66.6667	0.352183	0.188396	0.0112051				733	0.000195112	0.352704
AMP	AAB	1	2	1				0	0				0	0		AB	0	0	0		66.6667	0.352183	0.765572	0.00648058				734	0.998284	0.395816
AMP	AAB	1	2	1				0	0				0	0		AB	0	0	0		66.6667	0.352183	0.136146	-0.0125894				735	0.000882308	0.351577
AMP	AAB	1	2	1				0	0				0	0		AB	0	0	0		66.6667	0.352183	0.431812	0.034173				736	0.29916	0.358645
AMP	AAB	1	2	1				0	0				0	0		AB	0	0	0		66.6667	0.352183	0.0999901	0.0255159				737	0.00341696	0.42561
AMP	AAB	1	2	1				0	0				0	0		AB	0	0	0		66.6667	0.352183	0.386328	-0.0443289				738	0.377662	0.317709
AMP	AAB	1	2	1				0	0				0	0		AB	0	0	0		66.6667	0.352183	0.943215	-0.0197517				739	1	0.415136
AMP	AAB	1	2	1				0	0				0	0		AB	0	0	0		66.6667	0.352183	0.0796399	0.065685				740	0.00157302	0.30371
AMP	AAB	1	2	1				0	0				0	0		AB	0	0	0		66.6667	0.352183	0.701981	-0.00512074				741	0.990778	0.328266
AMP	AAB	1	2	1				0	0				0	0		AB	0	0	0		66.6667	0.352183	0.27724	-0.00599466				742	0.00141968	0.374469
AMP	AAB	1	2	1				0	0				0	0		AB	0	0	0		66.6667	0.352183	0.145262	0.00927796				743	0.000870794	0.334689
AMP	AAB	1	2	1				0	0				0	0		AB	0	0	0		66.6667	0.352183	0.783733	0.018235				744	0.998546	0.357729
AMP	AAB	1	2	1				0	0				0	0		AB	0	0	0		66.6667	0.352183	0.375161	0.0918541				745	0.241479	0.291767
AMP	AAB	1	2	1				0	0				0	0		AB	0	0	0		66.6667	0.352183	0.641986	-0.00484451				746	0.661822	0.703796
AMP	AAB	1	2	1				0	0				0	0		AB	0	0	0		66.6667	0.352183	0.303054	0.010603				747	0.32273	0.360987
AMP	AAB	1	2	1				0	0				0	0		AB	0	0	0		66.6667	0.352183	0.9453	-0.0211582				748	0.997995	0.399704
AMP	AAB	1	2	1				0	0				0	0		AB	0	0	0		66.6667	0.352183	0.27758	0.00391167				749	0.00587309	0.323013
AMP	AAB	1	2	1				0	0				0	0		AB	0	0	0		66.6667	0.352183	0.197371	-0.0604443				750	0.000772048	0.370127
AMP	AAB	1	2	1				0	0				0	0		AB	0	0	0		66.6667	0.352183	0.966078	-0.0530914				751	1	0.51551
AMP	AAB	1	2	1				0	0				0	0		AB	0	0	0		66.6667	0.352183	0.398044	-0.0291216				752	0.362455	0.209063
AMP	AAB	1	2	1				0	0				0	0		AB	0	0	0		66.6667	0.352183	0.63458	0.00867241				753	0.675339	0.354335
AMP	AAB	1	2	1				0	0				0	0		AB	0	0	0		66.6667	0.352183	0.166221	-0.0283316				754	0.00144154	0.32525
AMP	AAB	1	2	1				0	0				0	0		AB	0	0	0		66.6667	0.352183	0.174199	0.00849541				755	0.00493534	0.2948
AMP	AAB	1	2	1				0	0				0	0		AB	0	0	0		66.6667	0.352183	0.0128099	-0.0848244				756	0.000108825	0.34866
AMP	AAB	1	2	1				0	0				0	0		AB	0	0	0		66.6667	0.352183	0.0619973	-0.0143078				757	0.00525889	0.619744
AMP	AAB	1	2	1				0	0				0	0		AB	0	0	0		66.6667	0.352183	0.154436	0.0295089				758	0.00220963	0.395941
AMP	AAB	1	2	1				0	0				0	0		AB	0	0	0		66.6667	0.352183	0.875516	-0.0604231				759	0.994833	0.398453
AMP	AAB	1	2	1				0	0				0	0		AB	0	0	0		66.6667	0.352183	0.27626	0.00512852				760	0.0166925	0.302543
AMP	AAB	1	2	1				0	0				0	0		AB	0	0	0		66.6667	0.352183	0.273924	0.034577				761	0.00140482	0.338706
AMP	AAB	1	2	1				0	0				0	0		AB	0	0	0		66.6667	0.352183	0.154594	-0.0137254				762	0.00534538	0.399549
AMP	AAB	1	2	1				0	0				0	0		AB	0	0	0		66.6667	0.352183	0.685419	-0.0145566				763	0.65211	0.287979
AMP	AAB	1	2	1				0	0				0	0		AB	0	0	0		66.6667	0.352183	0.679423	0.0191932				764	0.68586	0.316053
AMP	AAB	1	2	1				0	0				0	0		AB	0	0	0		66.6667	0.352183	0.201634	0.00331125				765	0.00387	0.372303
AMP	AAB	1	2	1				0	0				0	0		AB	0	0	0		66.6667	0.352183	0.0924071	-0.0349687				766	0.000305983	0.362721
AMP	AAB	1	2	1				0	0				0	0		AB	0	0	0		66.6667	0.352183	0.73433	-0.0373696				767	1	0.386892
AMP	AAB	1	2	1				0	0				0	0		AB	0	0	0		66.6667	0.352183	0.0325634	0.00243799				768	0.00121688	0.519746
AMP	AAB	1	2	1				0	0				0	0		AB	0	0	0		66.6667	0.352183	0.568036	-0.0105				769	0.656167	0.350468
AMP	AAB	1	2	1				0	0				0	0		AB	0	0	0		66.6667	0.352183	0.721681	0.00648831				770	1	0.31484
AMP	AAB	1	2	1				0	0				0	0		AB	0	0	0		66.6667	0.352183	0.914007	0.0383881				771	0.998814	0.34711
AMP	AAB	1	2	1				0	0				0	0		AB	0	0	0		66.6667	0.352183	0.582651	-0.0668271				772	0.59984	0.463307
AMP	AAB	1	2	1				0	0				0	0		AB	0	0	0		66.6667	0.352183	0.162314	-0.0670317				773	0.010847	0.204981
AMP	AAB	1	2	1				0	0				0	0		AB	0	0	0		66.6667	0.352183	0.430081	0.00427434				774	0.329059	0.608477
AMP	AAB	1	2	1				0	0				0	0		AB	0	0	0		66.6667	0.352183	0.648249	0.050823				775	0.71749	0.36885
AMP	AAB	1	2	1				0	0				0	0		AB	0	0	0		66.6667	0.352183	0.234793	-0.0170487				776	0.0119329	0.478549
AMP	AAB	1	2	1				0	0				0	0		AB	0	0	0		66.6667	0.352183	0.0281918	0.0633626				777	0.000480634	0.418404
AMP	AAB	1	2	1				0	0				0	0		AB	0	0	0		66.6667	0.352183	0.0748106	-0.053396				778	0.00474019	0.453442
AMP	AAB	1	2	1				0	0				0	0		AB	0	0	0		66.6667	0.352183	0.232112	0.0203825				779	0.0123939	0.254713
AMP	AAB	1	2	1				0	0				0	0		AB	0	0	0		66.6667	0.352183	0.491139	-0.065995				780	0.399328	0.449673
AMP	AAB	1	2	1				0	0				0	0		AB	0	0	0		66.6667	0.352183	0.637005	-0.0150415				781	0.651625	0.445918
AMP	AAB	1	2	1				0	0				0	0		AB	0	0	0		66.6667	0.352183	0.213955	-0.0125486				782	0.0032182	0.288003
AMP	AAB	1	2	1				0	0				0	0		AB	0	0	0		66.6667	0.352183	0.0811336	-0.00312325				783	0.00101812	0.365062
AMP	AAB	1	2	1				0	0				0	0		AB	0	0	0		66.6667	0.352183	0.412503	0.0012758				784	0.332058	0.342681
AMP	AAB	1	2	1				0	0				0	0		AB	0	0	0		66.6667	0.352183	0.942219	4.52115e-05				785	0.99976	0.350453
AMP	AAB	1	2	1				0	0				0	0		AB	0	0	0		66.6667	0.352183	0.292696	0.0254201				786	1.32332e-05	0.352326
AMP	AAB	1	2	1				0	0				0	0		AB	0	0	0		66.6667	0.352183	0.874577	-0.00712303				787	0.995554	0.261206
AMP	AAB	1	2	1				0	0				0	0		AB	0	0	0		66.6667	0.352183	0.330238	-0.0413446				788	0.374678	0.338907
AMP	AAB	1	2	1				0	0				0	0		AB	0	0	0		66.6667	0.352183	0.42332	-0.0073552				789	0.340689	0.210087
AMP	AAB	1	2	1				0	0				0	0		AB	0	0	0		66.6667	0.352183	0.822296	0.0508292				790	1	0.325433
AMP	AAB	1	2	1				0	0				0	0		AB	0	0	0		66.6667	0.352183	0.958663	0.0246913				791	0.990254	0.541039
AMP	AAB	1	2	1				0	0				0	0		AB	0	0	0		66.6667	0.352183	0.802818	-0.0124315				792	0.996035	0.399311
AMP	AAB	1	2	1				0	0				0	0		AB	0	0	0		66.6667	0.352183	0.751427	-0.0100664				793	1	0.380914
AMP	AAB	1	2	1				0	0				0	0		AB	0	0	0		66.6667	0.352183	0.603706	-0.0405611				794	0.626106	0.399747
AMP	AAB	1	2	1				0	0				0	0		AB	0	0	0		66.6667	0.352183	0.326116	0.0418277				795	0.291506	0.436366
AMP	AAB	1	2	1				0	0				0	0		AB	0	0	0		66.6667	0.352183	0.863586	0.0112069				796	0.992776	0.422268
AMP	AAB	1	2	1				0	0				0	0		AB	0	0	0		66.6667	0.352183	0.38051	-0.0340133				797	0.367347	0.304781
AMP	AAB	1	2	1				0	0				0	0		AB	0	0	0		66.6667	0.352183	0.361519	0.00235013				798	0.330983	0.360295
AMP	AAB	1	2	1				0	0				0	0		AB	0	0	0		66.6667	0.352183	0.775722	0.00166887				799	0.999635	0.357908
AMP	AAB	1	2	1				0	0				0	0		AB	0	0	0		66.6667	0.352183	0.16749	0.00380365				800	0.000279519	0.359467
AMP	AAB	1	2	1				0	0				0	0		AB	0	0	0		66.6667	0.352183	0.938969	0.00284617				801	0.999286	0.355433
AMP	AAB	1	2	1				0	0				0	0		AB	0	0	0		66.6667	0.352183	0.268029	-0.0129956				802	0.000762856	0.346445
AMP	AAB	1	2	1				0	0				0	0		AB	0	0	0		66.6667	0.352183	0.679955	-0.000669775				803	0.665997	0.397322
AMP	AAB	1	2	1				0	0				0	0		AB	0	0	0		66.6667	0.352183	0.871881	0.0314841				804	1	0.353471
AMP	AAB	1	2	1				0	0				0	0		AB	0	0	0		66.6667	0.352183	0.239229	-0.066035				805	0.00753193	0.392182
AMP	AAB	1	2	1				0	0				0	0		AB	0	0	0		66.6667	0.352183	0.911589	0.0103124				806	1	0.26307
AMP	AAB	1	2	1				0	0				0	0		AB	0	0	0		66.6667	0.352183	0.838189	-0.068023				807	0.998271	0.383302
AMP	AAB	1	2	1				0	0				0	0		AB	0	0	0		66.6667	0.352183	0.530187	0.00684194				808	0.673509	0.647828
AMP	AAB	1	2	1				0	0				0	0		AB	0	0	0		66.6667	0.352183	0.951139	-0.00655239				809	0.998698	0.323231
AMP	AAB	1	2	1				0	0				0	0		AB	0	0	0		66.6667	0.352183	0.864266	0.0831332				810	1	0.366577
AMP	AAB	1	2	1				0	0				0	0		AB	0	0	0		66.6667	0.352183	0.934749	0.0547862				811	0.984458	-0.0211014
AMP	AAB	1	2	1				0	0				0	0		AB	0	0	0		66.6667	0.352183	0.904475	-0.00154597				812	0.990089	0.180038
AMP	AAB	1	2	1				0	0				0	0		AB	0	0	0		66.6667	0.352183	0.991575	-0.0612061				813	1	0.351596
AMP	AAB	1	2	1				0	0				0	0		AB	0	0	0		66.6667	0.352183	0.701716	0.000763047				814	1	0.426712
AMP	AAB	1	2	1				0	0				0	0		AB	0	0	0		66.6667	0.352183	0.80469	-0.0566251				815	0.999877	0.354287
AMP	AAB	1	2	1				0	0				0	0		AB	0	0	0		66.6667	0.352183	0.254074	0.0338957				816	0.0143869	0.124179
AMP	AAB	1	2	1				0	0				0	0		AB	0	0	0		66.6667	0.352183	0.770116	0.0256578				817	0.994779	0.51353
AMP	AAB	1	2	1				0	0				0	0		AB	0	0	0		66.6667	0.352183	0.860718	-0.0856033				818	0.995583	0.318744
AMP	AAB	1	2	1				0	0				0	0		AB	0	0	0		66.6667	0.352183	0.273633	0.0638664				819	0.0234239	0.125392
AMP	AAB	1	2	1				0	0				0	0		AB	0	0	0		66.6667	0.352183	0.467112	-0.00128894				820	0.334622	0.210853
AMP	AAB	1	2	1				0	0				0	0		AB	0	0	0		66.6667	0.352183	0.162294	0.0264002				821	0.000209187	0.357662
AMP	AAB	1	2	1				0	0				0	0		AB	0	0	0		66.6667	0.352183	0.421523	0.0571351				822	0.276198	0.252504
AMP	AAB	1	2	1				0	0				0	0		AB	0	0	0		66.6667	0.352183	0.127431	-0.0109947				823	0.00728079	0.205534
AMP	AAB	1	2	1				0	0				0	0		AB	0	0	0		66.6667	0.352183	0.736247	0.0378544				824	1	0.381151
AMP	AAB	1	2	1				0	0				0	0		AB	0	0	0		66.6667	0.352183	0.000625955	-0.00666166				825	2.36951e-05	0.534173
AMP	AAB	1	2	1				0	0				0	0		AB	0	0	0		66.6667	0.352183	0.478388	0.00472388				826	0.328609	0.327983
AMP	AAB	1	2	1				0	0				0	0		AB	0	0	0		66.6667	0.352183	0.913489	0.0297272				827	0.999137	0.370203
AMP	AAB	1	2	1				0	0				0	0		AB	0	0	0		66.6667	0.352183	0.0375103	0.0059454				828	0.00111508	0.232095
AMP	AAB	1	2	1				0	0				0	0		AB	0	0	0		66.6667	0.352183	0.669413	-0.0172246				829	0.649442	0.360664
AMP	AAB	1	2	1				0	0				0	0		AB	0	0	0		66.6667	0.352183	0.0449027	0.0474938				830	0.00077343	0.415723
AMP	AAB	1	2	1				0	0				0	0		AB	0	0	0		66.6667	0.352183	0.00539652	0.0185543				831	0.000256301	0.208354
AMP	AAB	1	2	1				0	0				0	0		AB	0	0	0		66.6667	0.352183	0.096433	-0.0301823				832	0.00178925	0.303336
AMP	AAB	1	2	1				0	0				0	0		AB	0	0	0		66.6667	0.352183	0.0605744	0.00618479				833	0.00182827	0.269678
AMP	AAB	1	2	1				0	0				0	0		AB	0	0	0		66.6667	0.352183	0.883849	0.00462873				834	0.998907	0.328622
AMP	AAB	1	2	1				0	0				0	0		AB	0	0	0		66.6667	0.352183	0.0490313	0.0371941				835	0.000226953	0.371531
AMP	AAB	1	2	1				0	0				0	0		AB	0	0	0		66.6667	0.352183	0.509468	0.0272326				836	0.693899	0.502347
AMP	AAB	1	2	1				0	0				0	0		AB	0	0	0		66.6667	0.352183	0.0893583	1.571e-05				837	0.00243346	0.330517
AMP	AAB	1	2	1				0	0				0	0		AB	0	0	0		66.6667	0.352183	0.679596	0.000679412				838	0.667346	0.352145
AMP	AAB	1	2	1				0	0				0	0		AB	0	0	0		66.6667	0.352183	0.40797	0.0755588				839	0.257775	0.352834
AMP	AAB	1	2	1				0	0				0	0		AB	0	0	0		66.6667	0.352183	0.903785	0.0317975				840	0.986342	-0.0233234
AMP	AAB	1	2	1				0	0				0	0		AB	0	0	0		66.6667	0.352183	0.498305	0.000267031				841	0.333066	0.34546
AMP	AAB	1	2	1				0	0				0	0		AB	0	0	0		66.6667	0.352183	0.819627	0.0105817				842	0.999956	0.351533
AMP	AAB	1	2	1				0	0				0	0		AB	0	0	0		66.6667	0.352183	0.885521	0.0286579				843	0.998126	0.403391
AMP	AAB	1	2	1				0	0				0	0		AB	0	0	0		66.6667	0.352183	0.982662	-0.0284598				844	0.994368	0.46785
AMP	AAB	1	2	1				0	0				0	0		AB	0	0	0		66.6667	0.352183	0.563062	0.0262514				845	0.692918	0.378224
AMP	AAB	1	2	1				0	0				0	0		AB	0	0	0		66.6667	0.352183	0.969695	0.00585035				846	0.994909	0.245461
AMP	AAB	1	2	1				0	0				0	0		AB	0	0	0		66.6667	0.352183	0.226716	0.0117912				847	0.00132637	0.323463
AMP	AAB	1	2	1				0	0				0	0		AB	0	0	0		66.6667	0.352183	0.901031	0.00201801				848	0.997875	0.374722
AMP	AAB	1	2	1				0	0				0	0		AB	0	0	0		66.6667	0.352183	0.120191	-0.0107808				849	0.000242547	0.359414
AMP	AAB	1	2	1				0	0				0	0		AB	0	0	0		66.6667	0.352183	0.947942	0.0132976				850	1	0.393891
AMP	AAB	1	2	1				0	0				0	0		AB	0	0	0		66.6667	0.352183	0.86713	-0.000698416				851	0.997694	0.354372
AMP	AAB	1	2	1				0	0				0	0		AB	0	0	0		66.6667	0.352183	0.60099	-0.00351439				852	0.663152	0.35014
AMP	AAB	1	2	1				0	0				0	0		AB	0	0	0		66.6667	0.352183	0.400904	0.00102012				853	0.332313	0.361949
AMP	AAB	1	2	1				0	0				0	0		AB	0	0	0		66.6667	0.352183	0.427922	-0.00357877				854	0.336912	0.357295
AMP	AAB	1	2	1				0	0				0	0		AB	0	0	0		66.6667	0.352183	0.833575	-0.0104925				855	1	0.335686
AMP	AAB	1	2	1				0	0				0	0		AB	0	0	0		66.6667	0.352183	0.818825	-0.00243868				856	1	0.307768
AMP	AAB	1	2	1				0	0				0	0		AB	0	0	0		66.6667	0.352183	0.70597	-0.0289223				857	1	0.356369
AMP	AAB	1	2	1				0	0				0	0		AB	0	0	0		66.6667	0.352183	0.52451	0.0173064				858	0.683973	0.406097
AMP	AAB	1	2	1				0	0				0	0		AB	0	0	0		66.6667	0.352183	0.715931	0.0503714				859	0.997522	0.385557
AMP	AAB	1	2	1				0	0				0	0		AB	0	0	0		66.6667	0.352183	0.88606	0.00478717				860	0.991074	0.561638
AMP	AAB	1	2	1				0	0				0	0		AB	0	0	0		66.6667	0.352183	0.260535	-0.019784				861	0.00124722	0.369473
AMP	AAB	1	2	1				0	0				0	0		AB	0	0	0		66.6667	0.352183	0.722788	-0.0384067				862	1	0.424969
AMP	AAB	1	2	1				0	0				0	0		AB	0	0	0		66.6667	0.352183	0.725221	0.0675373				863	1	0.447551
AMP	AAB	1	2	1				0	0				0	0		AB	0	0	0		66.6667	0.352183	0.790265	-0.0896465				864	0.989326	0.268347
AMP	AAB	1	2	1				0	0				0	0		AB	0	0	0		66.6667	0.352183	0.639545	0.0475936				865	0.71426	0.141525
AMP	AAB	1	2	1				0	0				0	0		AB	0	0	0		66.6667	0.352183	0.755272	-0.0944163				866	0.992811	0.469468
AMP	AAB	1	2	1				0	0				0	0		AB	0	0	0		66.6667	0.352183	0.266211	0.00134727				867	0.0251346	-0.104226
AMP	AAB	1	2	1				0	0				0	0		AB	0	0	0		66.6667	0.352183	0.188009	-0.0479421				868	0.0002533	0.350057
AMP	AAB	1	2	1				0	0				0	0		AB	0	0	0		66.6667	0.352183	0.0017764	0.00458672				869	8.51643e-05	0.569636
AMP	AAB	1	2	1				0	0				0	0		AB	0	0	0		66.6667	0.352183	0.378118	0.0233769				870	0.309956	0.331255
AMP	AAB	1	2	1				0	0				0	0		AB	0	0	0		66.6667	0.352183	0.992219	-0.0166666				871	0.995361	0.370546
AMP	AAB	1	2	1				0	0				0	0		AB	0	0	0		66.6667	0.352183	0.371037	-0.0227676				872	0.356101	0.298891
AMP	AAB	1	2	1				0	0				0	0		AB	0	0	0		66.6667	0.352183	0.8054	0.0146967				873	1	0.277457
AMP	AAB	1	2	1				0	0				0	0		AB	0	0	0		66.6667	0.352183	0.311047	-0.0604576				874	0.393791	0.336446
AMP	AAB	1	2	1				0	0				0	0		AB	0	0	0		66.6667	0.352183	0.0101503	0.0289359				875	0.000613662	0.625033
AMP	AAB	1	2	1				0	0				0	0		AB	0	0	0		66.6667	0.352183	0.511078	-0.064487				876	0.60218	0.228528
AMP	AAB	1	2	1				0	0				0	0		AB	0	0	0		66.6667	0.352183	0.513157	0.0454593				877	0.712126	0.373005
AMP	AAB	1	2	1				0	0				0	0		AB	0	0	0		66.6667	0.352183	0.479069	0.023216				878	0.310117	0.38781
AMP	AAB	1	2	1				0	0				0	0		AB	0	0	0		66.6667	0.352183	0.248125	-0.00273003				879	0.00576047	0.343432
AMP	AAB	1	2	1				0	0				0	0		AB	0	0	0		66.6667	0.352183	0.941984	-0.0454538				880	1	0.34298
AMP	AAB	1	2	1				0	0				0	0		AB	0	0	0		66.6667	0.352183	0.477842	0.0265504				881	0.306783	0.37195
AMP	AAB	1	2	1				0	0				0	0		AB	0	0	0		66.6667	0.352183	0.183793	0.0125189				882	0.00487979	0.288101
AMP	AAB	1	2	1				0	0				0	0		AB	0	0	0		66.6667	0.352183	0.520549	0.00382282				883	0.670489	0.350409
AMP	AAB	1	2	1				0	0				0	0		AB	0	0	0		66.6667	0.352183	0.843019	-0.0532858				884	0.999355	0.368956
AMP	AAB	1	2	1				0	0				0	0		AB	0	0	0		66.6667	0.352183	0.539698	-0.0109594				885	0.655707	0.539625
AMP	AAB	1	2	1				0	0				0	0		AB	0	0	0		66.6667	0.352183	0.703894	-0.0322533				886	1	0.374568
AMP	AAB	1	2	1				0	0				0	0		AB	0	0	0		66.6667	0.352183	0.339287	-0.0012958				887	0.334629	0.236037
AMP	AAB	1	2	1				0	0				0	0		AB	0	0	0		66.6667	0.352183	0.229143	-0.0305762				888	0.000296924	0.354319
AMP	AAB	1	2	1				0	0				0	0		AB	0	0	0		66.6667	0.352183	0.351041	0.0249159				889	0.308417	0.263757
AMP	AAB	1	2	1				0	0				0	0		AB	0	0	0		66.6667	0.352183	0.66125	0.0475136				890	0.71418	0.470469
AMP	AAB	1	2	1				0	0				0	0		AB	0	0	0		66.6667	0.352183	0.521106	-0.0468365				891	0.61983	0.290373
AMP	AAB	1	2	1				0	0				0	0		AB	0	0	0		66.6667	0.352183	0.434511	0.0271366				892	0.306197	0.292371
AMP	AAB	1	2	1				0	0				0	0		AB	0	0	0		66.6667	0.352183	0.133543	0.010291				893	0.00362391	0.220833
AMP	AAB	1	2	1				0	0				0	0		AB	0	0	0		66.6667	0.352183	0.0423381	-0.0415293				894	0.000435702	0.301913
AMP	AAB	1	2	1				0	0				0	0		AB	0	0	0		66.6667	0.352183	0.916453	-0.00370389				895	1	0.476435
AMP	AAB	1	2	1				0	0				0	0		AB	0	0	0		66.6667	0.352183	0.998646	0.0160304				896	1	0.342166
AMP	AAB	1	2	1				0	0				0	0		AB	0	0	0		66.6667	0.352183	0.92484	-0.0411688				897	0.997035	0.320195
AMP	AAB	1	2	1				0	0				0	0		AB	0	0	0		66.6667	0.352183	0.114427	-0.00503815				898	0.00471082	0.399909
AMP	AAB	1	2	1				0	0				0	0		AB	0	0	0		66.6667	0.352183	0.81005	0.00376185				899	1	0.332183
AMP	AAB	1	2	1				0	0				0	0		AB	0	0	0		66.6667	0.352183	0.96333	-0.041457				900	0.999275	0.348432
AMP	AAB	1	2	1				0	0				0	0		AB	0	0	0		66.6667	0.352183	0.0208602	-0.0217718				901	0.000864801	0.199903
AMP	AAB	1	2	1				0	0				0	0		AB	0	0	0		66.6667	0.352183	0.0430237	0.0131463				902	0.000936704	0.400773
AMP	AAB	1	2	1				0	0				0	0		AB	0	0	0		66.6667	0.352183	0.183383	-0.00636621				903	0.00241081	0.325373
AMP	AAB	1	2	1				0	0				0	0		AB	0	0	0		66.6667	0.352183	0.682612	0.00157719				904	0.668244	0.328299
AMP	AAB	1	2	1				0	0				0	0		AB	0	0	0		66.6667	0.352183	0.640987	0.0395293				905	0.706196	0.352635
AMP	AAB	1	2	1				0	0				0	0		AB	0	0	0		66.6667	0.352183	0.58895	-0.0428906				906	0.623776	0.316523
AMP	AAB	1	2	1				0	0				0	0		AB	0	0	0		66.6667	0.352183	0.684907	0.071577				907	0.738244	0.543734
AMP	AAB	1	2	1				0	0				0	0		AB	0	0	0		66.6667	0.352183	0.852994	0.0743041				908	0.987789	0.335527
AMP	AAB	1	2	1				0	0				0	0		AB	0	0	0		66.6667	0.352183	0.611475	0.0320204				909	0.698687	0.615039
AMP	AAB	1	2	1				0	0				0	0		AB	0	0	0		66.6667	0.352183	0.627523	-0.0298551				910	0.636812	0.477829
AMP	AAB	1	2	1				0	0				0	0		AB	0	0	0		66.6667	0.352183	0.328449	-0.0136458				911	0.346979	0.380403
AMP	AAB	1	2	1				0	0				0	0		AB	0	0	0		66.6667	0.352183	0.0117686	0.00309981				912	0.000160592	0.324415
AMP	AAB	1	2	1				0	0				0	0		AB	0	0	0		66.6667	0.352183	0.0641703	-0.01541				913	0.000198916	0.358526
AMP	AAB	1	2	1				0	0				0	0		AB	0	0	0		66.6667	0.352183	0.173171	0.031885				914	0.00266856	0.395772
AMP	AAB	1	2	1				0	0				0	0		AB	0	0	0		66.6667	0.352183	0.655848	-0.038082				915	0.628585	0.497002
AMP	AAB	1	2	1				0	0				0	0		AB	0	0	0		66.6667	0.352183	0.626184	0.0530189				916	0.719686	0.233813
AMP	AAB	1	2	1				0	0				0	0		AB	0	0	0		66.6667	0.352183	0.800992	-7.01361e-05				917	0.991506	0.236188
AMP	AAB	1	2	1				0	0				0	0		AB	0	0	0		66.6667	0.352183	0.00323742	-0.00369075				918	2.2706e-07	0.351857
AMP	AAB	1	2	1				0	0				0	0		AB	0	0	0		66.6667	0.352183	0.0533196	-0.0178792				919	0.000196789	0.355807
AMP	AAB	1	2	1				0	0				0	0		AB	0	0	0		66.6667	0.352183	0.875599	-0.00377766				920	1	0.295888
AMP	AAB	1	2	1				0	0				0	0		AB	0	0	0		66.6667	0.352183	0.0672952	-0.00215735				921	0.000254219	0.337611
AMP	AAB	1	2	1				0	0				0	0		AB	0	0	0		66.6667	0.352183	0.200919	-0.0466435				922	0.000433452	0.352396
AMP	AAB	1	2	1				0	0				0	0		AB	0	0	0		66.6667	0.352183	0.481439	0.000794331				923	0.332539	0.305324
AMP	AAB	1	2	1				0	0				0	0		AB	0	0	0		66.6667	0.352183	0.444413	0.00984761				924	0.323486	0.356013
AMP	AAB	1	2	1				0	0				0	0		AB	0	0	0		66.6667	0.352183	0.252208	0.00338471				925	0.00248365	0.315368
AMP	AAB	1	2	1				0	0				0	0		AB	0	0	0		66.6667	0.352183	0.60432	0.0543176				926	0.720984	0.343834
AMP	AAB	1	2	1				0	0				0	0		AB	0	0	0		66.6667	0.352183	0.589258	0.000621105				927	0.667288	0.525228
AMP	AAB	1	2	1				0	0				0	0		AB	0	0	0		66.6667	0.352183	0.261697	0.0209846				928	0.000162541	0.349602
AMP	AAB	1	2	1				0	0				0	0		AB	0	0	0		66.6667	0.352183	0.734423	-0.00457068				929	0.996918	0.26997
AMP	AAB	1	2	1				0	0				0	0		AB	0	0	0		66.6667	0.352183	0.914233	-0.00354021				930	1	0.364761
AMP	AAB	1	2	1				0	0				0	0		AB	0	0	0		66.6667	0.352183	0.629595	0.0978459				931	0.764513	0.338634
AMP	AAB	1	2	1				0	0				0	0		AB	0	0	0		66.6667	0.352183	0.609995	0.0306186				932	0.697285	0.651743
AMP	AAB	1	2	1				0	0				0	0		AB	0	0	0		66.6667	0.352183	0.968306	-0.0304075				933	0.99407	0.369305
AMP	AAB	1	2	1				0	0				0	0		AB	0	0	0		66.6667	0.352183	0.0909429	0.0133654				934	0.00276534	0.500753
AMP	AAB	1	2	1				0	0				0	0		AB	0	0	0		66.6667	0.352183	0.244053	0.00800425				935	0.00326188	0.417623
AMP	AAB	1	2	1				0	0				0	0		AB	0	0	0		66.6667	0.352183	0.711158	-0.0308852				936	0.998862	0.362342
AMP	AAB	1	2	1				0	0				0	0		AB	0	0	0		66.6667	0.352183	0.775637	0.00346919				937	1	0.402625
AMP	AAB	1	2	1				0	0				0	0		AB	0	0	0		66.6667	0.352183	0.679905	0.00847128				938	0.675138	0.344109
AMP	AAB	1	2	1				0	0				0	0		AB	0	0	0		66.6667	0.352183	0.28569	0.0782525				939	0.00242016	0.311842
AMP	AAB	1	2	1				0	0				0	0		AB	0	0	0		66.6667	0.352183	0.413406	-0.0185295				940	0.351863	0.383248
AMP	AAB	1	2	1				0	0				0	0		AB	0	0	0		66.6667	0.352183	0.243005	-0.00940619				941	0.00450276	0.329569
AMP	AAB	1	2	1				0	0				0	0		AB	0	0	0		66.6667	0.352183	0.901367	0.00322946				942	1	0.383108
AMP	AAB	1	2	1				0	0				0	0		AB	0	0	0		66.6667	0.352183	0.0805624	-0.049839				943	0.000260173	0.342927
AMP	AAB	1	2	1				0	0				0	0		AB	0	0	0		66.6667	0.352183	0.493949	-0.00494159				944	0.338275	0.168088
AMP	AAB	1	2	1				0	0				0	0		AB	0	0	0		66.6667	0.352183	0.556762	0.041526				945	0.708193	0.333582
AMP	AAB	1	2	1				0	0				0	0		AB	0	0	0		66.6667	0.352183	0.919153	-0.0163858				946	0.992366	0.306274
AMP	AAB	1	2	1				0	0				0	0		AB	0	0	0		66.6667	0.352183	0.966361	-0.0716966				947	1	0.353483
AMP	AAB	1	2	1				0	0				0	0		AB	0	0	0		66.6667	0.352183	0.542132	0.00278629				948	0.669453	0.519277
AMP	AAB	1	2	1				0	0				0	0		AB	0	0	0		66.6667	0.352183	0.660066	-0.0165744				949	0.650092	0.348901
AMP	AAB	1	2	1				0	0				0	0		AB	0	0	0		66.6667	0.352183	0.556134	-0.00719923				950	0.659467	0.427412
AMP	AAB	1	2	1				0	0				0	0		AB	0	0	0		66.6667	0.352183	0.861562	0.0164314				951	1	0.32519
AMP	AAB	1	2	1				0	0				0	0		AB	0	0	0		66.6667	0.352183	0.797074	0.00231528				952	0.997381	0.299594
AMP	AAB	1	2	1				0	0				0	0		AB	0	0	0		66.6667	0.352183	0.234378	0.00483496				953	0.000542652	0.344367
AMP	AAB	1	2	1				0	0				0	0		AB	0	0	0		66.6667	0.352183	0.115917	-0.0483986				954	0.000560452	0.339181
AMP	AAB	1	2	1				0	0				0	0		AB	0	0	0		66.6667	0.352183	0.154464	-0.0769533				955	0.00747582	0.421983
AMP	AAB	1	2	1				0	0				0	0		AB	0	0	0		66.6667	0.352183	0.258569	0.0726929				956	0.0198977	0.492191
AMP	AAB	1	2	1				0	0				0	0		AB	0	0	0		66.6667	0.352183	0.959415	-0.0218396				957	0.986051	0.448367
AMP	AAB	1	2	1				0	0				0	0		AB	0	0	0		66.6667	0.352183	0.986132	0.00494724				958	1	0.415538
AMP	AAB	1	2	1				0	0				0	0		AB	0	0	0		66.6667	0.352183	0.796332	0.0751453				959	0.999212	0.337738
AMP	AAB	1	2	1				0	0				0	0		AB	0	0	0		66.6667	0.352183	0.559645	-0.0167192				960	0.649947	0.306212
AMP	AAB	1	2	1				0	0				0	0		AB	0	0	0		66.6667	0.352183	0.496419	-0.00995256				961	0.343286	0.283522
AMP	AAB	1	2	1				0	0				0	0		AB	0	0	0		66.6667	0.352183	0.304878	-0.00123421				962	0.334568	0.363044
AMP	AAB	1	2	1				0	0				0	0		AB	0	0	0		66.6667	0.352183	0.427237	0.0409318				963	0.292402	0.349645
AMP	AAB	1	2	1				0	0				0	0		AB	0	0	0		66.6667	0.352183	0.364581	-0.0662472				964	0.399581	0.534599
AMP	AAB	1	2	1				0	0				0	0		AB	0	0	0		66.6667	0.352183	0.727833	0.0089088				965	1	0.0562271
AMP	AAB	1	2	1				0	0				0	0		AB	0	0	0		66.6667	0.352183	0.751034	-0.0267222				966	0.998662	0.364589
AMP	AAB	1	2	1				0	0				0	0		AB	0	0	0		66.6667	0.352183	0.833198	0.00295892				967	1	0.2882
AMP	AAB	1	2	1				0	0				0	0		AB	0	0	0		66.6667	0.352183	0.309841	-0.0541899				968	0.387523	0.33767
AMP	AAB	1	2	1				0	0				0	0		AB	0	0	0		66.6667	0.352183	0.230508	-0.0643615				969	0.0124912	0.100862
AMP	AAB	1	2	1				0	0				0	0		AB	0	0	0		66.6667	0.352183	0.901333	-0.0119652				970	1	0.31987
AMP	AAB	1	2	1				0	0				0	0		AB	0	0	0		66.6667	0.352183	0.219291	-0.00791973				971	0.00262386	0.374715
AMP	AAB	1	2	1				0	0				0	0		AB	0	0	0		66.6667	0.352183	0.646419	-0.0572207				972	0.609446	0.315419
AMP	AAB	1	2	1				0	0				0	0		AB	0	0	0		66.6667	0.352183	0.0810048	0.00936891				973	0.00463515	0.34673
AMP	AAB	1	2	1				0	0				0	0		AB	0	0	0		66.6667	0.352183	0.93694	-0.000373629				974	0.998244	0.321019
AMP	AAB	1	2	1				0	0				0	0		AB	0	0	0		66.6667	0.352183	0.286876	-0.0134483				975	0.000107185	0.351315
AMP	AAB	1	2	1				0	0				0	0		AB	0	0	0		66.6667	0.352183	0.0472727	-0.00664166				976	0.000635738	0.29958
AMP	AAB	1	2	1				0	0				0	0		AB	0	0	0		66.6667	0.352183	0.286846	0.00623163				977	0.00190513	0.34203
AMP	AAB	1	2	1				0	0				0	0		AB	0	0	0		66.6667	0.352183	0.820632	0.0313713				978	0.998977	0.356186
AMP	AAB	1	2	1				0	0				0	0		AB	0	0	0		66.6667	0.352183	0.435119	-0.0179696				979	0.351303	0.463773
AMP	AAB	1	2	1				0	0				0	0		AB	0	0	0		66.6667	0.352183	0.373003	-0.0154343				980	0.348768	0.347031
AMP	AAB	1	2	1				0	0				0	0		AB	0	0	0		66.6667	0.352183	0.800358	-0.0383883				981	1	0.426054
AMP	AAB	1	2	1				0	0				0	0		AB	0	0	0		66.6667	0.352183	0.758792	0.00260784				982	1	0.232345
AMP	AAB	1	2	1				0	0				0	0		AB	0	0	0		66.6667	0.352183	0.77266	-0.0189103				983	0.999597	0.357816
AMP	AAB	1	2	1				0	0				0	0		AB	0	0	0		66.6667	0.352183	0.319289	-0.0292684				984	0.362602	0.353332
AMP	AAB	1	2	1				0	0				0	0		AB	0	0	0		66.6667	0.352183	0.524703	0.0154864				985	0.682153	0.258557
AMP	AAB	1	2	1				0	0				0	0		AB	0	0	0		66.6667	0.352183	0.071844	0.0393883				986	0.00111261	0.304656
AMP	AAB	1	2	1				0	0				0	0		AB	0	0	0		66.6667	0.352183	0.188901	7.21054e-05				987	0.00744049	0.490392
AMP	AAB	1	2	1				0	0				0	0		AB	0	0	0		66.6667	0.352183	0.0158799	-0.000979648				988	1.14502e-06	0.352097
AMP	AAB	1	2	1				0	0				0	0		AB	0	0	0		66.6667	0.352183	0.665798	-0.00998127				989	0.656685	0.352126
AMP	AAB	1	2	1				0	0				0	0		AB	0	0	0		66.6667	0.352183	0.100116	-0.0368781				990	0.000999285	0.337609
AMP	AAB	1	2	1				0	0				0	0		AB	0	0	0		66.6667	0.352183	0.250173	0.003117				991	0.00922592	0.298797
AMP	AAB	1	2	1				0	0				0	0		AB	0	0	0		66.6667	0.352183	0.38265	0.00263604				992	0.330697	0.360536
AMP	AAB	1	2	1				0	0				0	0		AB	0	0	0		66.6667	0.352183	0.27713	0.0011095				993	0.000730527	0.362663
AMP	AAB	1	2	1				0	0				0	0		AB	0	0	0		66.6667	0.352183	0.60554	0.00348407				994	0.670151	0.353215
AMP	AAB	1	2	1				0	0				0	0		AB	0	0	0		66.6667	0.352183	0.282088	0.0251451				995	0.000982813	0.349309
AMP	AAB	1	2	1				0	0				0	0		AB	0	0	0		66.6667	0.352183	0.926226	0.0194181				996	0.995342	0.434355
AMP	AAB	1	2	1				0	0				0	0		AB	0	0	0		66.6667	0.352183	0.0683795	0.0383787				997	0.0013278	0.416904
AMP	AAB	1	2	1				0	0				0	0		AB	0	0	0		66.6667	0.352183	0.506431	-0.00873399				998	0.657933	0.286405
AMP	AAB	0.7	1.4	0.7				0	0				0	0		AB	0.3	0.3	0.3		62.963	0.260668	0.989025	0.0207999				999	1	0.293888
AMP	AAB	0.7	1.4	0.7				0	0				0	0		AB	0.3	0.3	0.3		62.963	0.260668	0.952843	0.0191134				1000	0.996036	0.294879
AMP	AAB	0.7	1.4	0.7				0	0				0	0		AB	0.3	0.3	0.3		62.963	0.260668	0.965009	0.0567723				1001	0.996311	0.337383
AMP	AAB	0.7	1.4	0.7				0	0				0	0		AB	0.3	0.3	0.3		62.963	0.260668	0.620721	0.012226				1002	0.641856	0.083068
AMP	AAB	0.7	1.4	0.7				0	0				0	0		AB	0.3	0.3	0.3		62.963	0.260668	0.142617	0.0102617				1003	0.00174364	0.268896
AMP	AAB	0.7	1.4	0.7				0	0				0	0		AB	0.3	0.3	0.3		62.963	0.260668	0.542315	0.0216782				1004	0.651308	0.288511
AMP	AAB	0.7	1.4	0.7				0	0				0	0		AB	0.3	0.3	0.3		62.963	0.260668	0.651313	-0.0350734				1005	0.594556	0.246463
AMP	AAB	0.7	1.4	0.7				0	0				0	0		AB	0.3	0.3	0.3		62.963	0.260668	0.523891	-0.0364894				1006	0.59314	0.281356
AMP	AAB	0.7	1.4	0.7				0	0				0	0		AB	0.3	0.3	0.3		62.963	0.260668	0.447319	0.00941256				1007	0.360958	0.125544
AMP	AAB	0.7	1.4	0.7				0	0				0	0		AB	0.3	0.3	0.3		62.963	0.260668	0.75151	0.0375915				1008	0.998585	0.233901
AMP	AAB	0.7	1.4	0.7				0	0				0	0		AB	0.3	0.3	0.3		62.963	0.260668	0.27532	0.011817				1009	0.0103497	0.325601
AMP	AAB	0.7	1.4	0.7				0	0				0	0		AB	0.3	0.3	0.3		62.963	0.260668	0.762306	-0.000311522				1010	0.998198	0.318532
AMP	AAB	0.7	1.4	0.7				0	0				0	0		AB	0.3	0.3	0.3		62.963	0.260668	0.0147993	0.0294262				1011	4.6103e-06	0.260443
AMP	AAB	0.7	1.4	0.7				0	0				0	0		AB	0.3	0.3	0.3		62.963	0.260668	0.524787	0.0632307				1012	0.69286	0.355406
AMP	AAB	0.7	1.4	0.7				0	0				0	0		AB	0.3	0.3	0.3		62.963	0.260668	0.666282	-0.0180964				1013	0.611533	0.0917502
AMP	AAB	0.7	1.4	0.7				0	0				0	0		AB	0.3	0.3	0.3		62.963	0.260668	0.753914	0.000405614				1014	1	0.175873
AMP	AAB	0.7	1.4	0.7				0	0				0	0		AB	0.3	0.3	0.3		62.963	0.260668	0.165995	-0.00170191				1015	6.733e-05	0.259459
AMP	AAB	0.7	1.4	0.7				0	0				0	0		AB	0.3	0.3	0.3		62.963	0.260668	0.604321	-0.0416131				1016	0.588017	0.266362
AMP	AAB	0.7	1.4	0.7				0	0				0	0		AB	0.3	0.3	0.3		62.963	0.260668	0.197794	0.0252352				1017	0.00823081	0.127769
AMP	AAB	0.7	1.4	0.7				0	0				0	0		AB	0.3	0.3	0.3		62.963	0.260668	0.333447	-0.0471015				1018	0.417472	0.298909
AMP	AAB	0.7	1.4	0.7				0	0				0	0		AB	0.3	0.3	0.3		62.963	0.260668	0.304227	0.0184507				1019	0.35192	0.237921
AMP	AAB	0.7	1.4	0.7				0	0				0	0		AB	0.3	0.3	0.3		62.963	0.260668	0.526007	0.00238421				1020	0.632014	0.195951
AMP	AAB	0.7	1.4	0.7				0	0				0	0		AB	0.3	0.3	0.3		62.963	0.260668	0.568003	-0.0486709				1021	0.580959	0.259824
AMP	AAB	0.7	1.4	0.7				0	0				0	0		AB	0.3	0.3	0.3		62.963	0.260668	0.620845	-0.0843204				1022	0.545309	0.110049
AMP	AAB	0.7	1.4	0.7				0	0				0	0		AB	0.3	0.3	0.3		62.963	0.260668	0.800976	-0.0300124				1023	1	0.208034
AMP	AAB	0.7	1.4	0.7				0	0				0	0		AB	0.3	0.3	0.3		62.963	0.260668	0.408142	0.0104326				1024	0.359938	0.180229
AMP	AAB	0.7	1.4	0.7				0	0				0	0		AB	0.3	0.3	0.3		62.963	0.260668	0.273253	-0.0567808				1025	0.00285075	0.212774
AMP	AAB	0.7	1.4	0.7				0	0				0	0		AB	0.3	0.3	0.3		62.963	0.260668	0.581348	0.0030994				1026	0.632729	0.0449859
AMP	AAB	0.7	1.4	0.7				0	0				0	0		AB	0.3	0.3	0.3		62.963	0.260668	0.998987	-0.00608708				1027	0.999381	0.273852
AMP	AAB	0.7	1.4	0.7				0	0				0	0		AB	0.3	0.3	0.3		62.963	0.260668	0.576397	0.0925653				1028	0.722195	0.267998
AMP	AAB	0.7	1.4	0.7				0	0				0	0		AB	0.3	0.3	0.3		62.963	0.260668	0.0691682	0.00105784				1029	0.00640258	0.514337
AMP	AAB	0.7	1.4	0.7				0	0				0	0		AB	0.3	0.3	0.3		62.963	0.260668	0.719107	-0.0169234				1030	0.999848	0.256315
AMP	AAB	0.7	1.4	0.7				0	0				0	0		AB	0.3	0.3	0.3		62.963	0.260668	0.762115	0.0591452				1031	1	0.345132
AMP	AAB	0.7	1.4	0.7				0	0				0	0		AB	0.3	0.3	0.3		62.963	0.260668	0.974409	-0.00189556				1032	0.988474	-0.0193002
AMP	AAB	0.7	1.4	0.7				0	0				0	0		AB	0.3	0.3	0.3		62.963	0.260668	0.667901	0.0103312				1033	0.639961	0.265071
AMP	AAB	0.7	1.4	0.7				0	0				0	0		AB	0.3	0.3	0.3		62.963	0.260668	0.25571	-0.00437321				1034	0.00264179	0.239675
AMP	AAB	0.7	1.4	0.7				0	0				0	0		AB	0.3	0.3	0.3		62.963	0.260668	0.742372	0.0250122				1035	1	0.268277
AMP	AAB	0.7	1.4	0.7				0	0				0	0		AB	0.3	0.3	0.3		62.963	0.260668	0.641497	-0.0268894				1036	0.60274	0.327555
AMP	AAB	0.7	1.4	0.7				0	0				0	0		AB	0.3	0.3	0.3		62.963	0.260668	0.865914	-0.00032797				1037	1	0.213104
AMP	AAB	0.7	1.4	0.7				0	0				0	0		AB	0.3	0.3	0.3		62.963	0.260668	0.468234	0.00879604				1038	0.361574	0.261871
AMP	AAB	0.7	1.4	0.7				0	0				0	0		AB	0.3	0.3	0.3		62.963	0.260668	0.425864	-0.0179307				1039	0.388301	0.282653
AMP	AAB	0.7	1.4	0.7				0	0				0	0		AB	0.3	0.3	0.3		62.963	0.260668	0.517381	0.0175149				1040	0.647144	0.229413
AMP	AAB	0.7	1.4	0.7				0	0				0	0		AB	0.3	0.3	0.3		62.963	0.260668	0.209029	-0.0749741				1041	0.00366111	0.225103
AMP	AAB	0.7	1.4	0.7				0	0				0	0		AB	0.3	0.3	0.3		62.963	0.260668	0.201975	-0.00303791				1042	0.0151429	0.4444
AMP	AAB	0.7	1.4	0.7				0	0				0	0		AB	0.3	0.3	0.3		62.963	0.260668	0.299835	0.0270436				1043	0.000910873	0.253623
AMP	AAB	0.7	1.4	0.7				0	0				0	0		AB	0.3	0.3	0.3		62.963	0.260668	0.951679	-0.000314173				1044	0.994853	0.30702
AMP	AAB	0.7	1.4	0.7				0	0				0	0		AB	0.3	0.3	0.3		62.963	0.260668	0.165396	-0.0649236				1045	5.19629e-05	0.262223
AMP	AAB	0.7	1.4	0.7				0	0				0	0		AB	0.3	0.3	0.3		62.963	0.260668	0.136751	-0.0309174				1046	0.00887835	0.0499151
AMP	AAB	0.7	1.4	0.7				0	0				0	0		AB	0.3	0.3	0.3		62.963	0.260668	0.133596	-0.0393693				1047	0.00413043	0.317391
AMP	AAB	0.7	1.4	0.7				0	0				0	0		AB	0.3	0.3	0.3		62.963	0.260668	0.511427	-0.0356306				1048	0.593999	0.334342
AMP	AAB	0.7	1.4	0.7				0	0				0	0		AB	0.3	0.3	0.3		62.963	0.260668	0.862294	0.0138435				1049	1	0.204689
AMP	AAB	0.7	1.4	0.7				0	0				0	0		AB	0.3	0.3	0.3		62.963	0.260668	0.846248	0.0113771				1050	0.997657	0.229575
AMP	AAB	0.7	1.4	0.7				0	0				0	0		AB	0.3	0.3	0.3		62.963	0.260668	0.462339	-0.0280886				1051	0.398459	0.297035
AMP	AAB	0.7	1.4	0.7				0	0				0	0		AB	0.3	0.3	0.3		62.963	0.260668	0.597981	-4.95093e-06				1052	0.629625	0.288979
AMP	AAB	0.7	1.4	0.7				0	0				0	0		AB	0.3	0.3	0.3		62.963	0.260668	0.918812	-0.036091				1053	1	0.260646
AMP	AAB	0.7	1.4	0.7				0	0				0	0		AB	0.3	0.3	0.3		62.963	0.260668	0.523323	-0.0226344				1054	0.606995	0.100243
AMP	AAB	0.7	1.4	0.7				0	0				0	0		AB	0.3	0.3	0.3		62.963	0.260668	0.694236	-0.0173951				1055	0.612235	0.201388
AMP	AAB	0.7	1.4	0.7				0	0				0	0		AB	0.3	0.3	0.3		62.963	0.260668	0.547984	0.0313158				1056	0.660945	0.213206
AMP	AAB	0.7	1.4	0.7				0	0				0	0		AB	0.3	0.3	0.3		62.963	0.260668	0.24062	-0.0219383				1057	0.00753521	0.28109
AMP	AAB	0.7	1.4	0.7				0	0				0	0		AB	0.3	0.3	0.3		62.963	0.260668	0.911292	0.00597868				1058	1	0.291523
AMP	AAB	0.7	1.4	0.7				0	0				0	0		AB	0.3	0.3	0.3		62.963	0.260668	0.0569917	0.0563426				1059	0.000340735	0.231658
AMP	AAB	0.7	1.4	0.7				0	0				0	0		AB	0.3	0.3	0.3		62.963	0.260668	0.201525	0.0723358				1060	0.0113544	0.219364
AMP	AAB	0.7	1.4	0.7				0	0				0	0		AB	0.3	0.3	0.3		62.963	0.260668	0.976974	-0.00477135				1061	0.985866	0.4814
AMP	AAB	0.7	1.4	0.7				0	0				0	0		AB	0.3	0.3	0.3		62.963	0.260668	0.785279	-0.0771286				1062	1	0.245079
AMP	AAB	0.7	1.4	0.7				0	0				0	0		AB	0.3	0.3	0.3		62.963	0.260668	0.292614	0.046864				1063	0.0225689	0.566478
AMP	AAB	0.7	1.4	0.7				0	0				0	0		AB	0.3	0.3	0.3		62.963	0.260668	0.276195	0.086526				1064	0.0129436	0.252222
AMP	AAB	0.7	1.4	0.7				0	0				0	0		AB	0.3	0.3	0.3		62.963	0.260668	0.945534	0.0153911				1065	0.983637	0.183669
AMP	AAB	0.7	1.4	0.7				0	0				0	0		AB	0.3	0.3	0.3		62.963	0.260668	0.366168	-0.00549487				1066	0.375865	0.224134
AMP	AAB	0.7	1.4	0.7				0	0				0	0		AB	0.3	0.3	0.3		62.963	0.260668	0.433397	-0.0322414				1067	0.402612	0.263979
AMP	AAB	0.7	1.4	0.7				0	0				0	0		AB	0.3	0.3	0.3		62.963	0.260668	0.957167	-0.014913				1068	1	0.119867
AMP	AAB	0.7	1.4	0.7				0	0				0	0		AB	0.3	0.3	0.3		62.963	0.260668	0.702886	0.0241824				1069	1	0.285305
AMP	AAB	0.7	1.4	0.7				0	0				0	0		AB	0.3	0.3	0.3		62.963	0.260668	0.706716	0.0184956				1070	0.996582	0.290394
AMP	AAB	0.7	1.4	0.7				0	0				0	0		AB	0.3	0.3	0.3		62.963	0.260668	0.784244	-0.0831026				1071	0.997099	0.346062
AMP	AAB	0.7	1.4	0.7				0	0				0	0		AB	0.3	0.3	0.3		62.963	0.260668	0.0501967	-0.0028973				1072	0.00417148	0.368837
AMP	AAB	0.7	1.4	0.7				0	0				0	0		AB	0.3	0.3	0.3		62.963	0.260668	0.681741	0.0193514				1073	0.648981	0.251826
AMP	AAB	0.7	1.4	0.7				0	0				0	0		AB	0.3	0.3	0.3		62.963	0.260668	0.896664	-0.00633182				1074	0.99653	0.221815
AMP	AAB	0.7	1.4	0.7				0	0				0	0		AB	0.3	0.3	0.3		62.963	0.260668	0.753123	0.0231722				1075	1	0.262769
AMP	AAB	0.7	1.4	0.7				0	0				0	0		AB	0.3	0.3	0.3		62.963	0.260668	0.437167	-0.00737444				1076	0.377745	0.284949
AMP	AAB	0.7	1.4	0.7				0	0				0	0		AB	0.3	0.3	0.3		62.963	0.260668	0.247855	-0.0289076				1077	0.00182779	0.241668
AMP	AAB	0.7	1.4	0.7				0	0				0	0		AB	0.3	0.3	0.3		62.963	0.260668	0.908157	0.00580093				1078	1	0.395395
AMP	AAB	0.7	1.4	0.7				0	0				0	0		AB	0.3	0.3	0.3		62.963	0.260668	0.319097	0.0447864				1079	0.325584	0.259368
AMP	AAB	0.7	1.4	0.7				0	0				0	0		AB	0.3	0.3	0.3		62.963	0.260668	0.151534	0.00572799				1080	0.00678668	0.454818
AMP	AAB	0.7	1.4	0.7				0	0				0	0		AB	0.3	0.3	0.3		62.963	0.260668	0.785775	0.0110922				1081	0.9991	0.285729
AMP	AAB	0.7	1.4	0.7				0	0				0	0		AB	0.3	0.3	0.3		62.963	0.260668	0.858068	-0.0111482				1082	0.998096	0.237858
AMP	AAB	0.7	1.4	0.7				0	0				0	0		AB	0.3	0.3	0.3		62.963	0.260668	0.853681	-0.034728				1083	1	0.306737
AMP	AAB	0.7	1.4	0.7				0	0				0	0		AB	0.3	0.3	0.3		62.963	0.260668	0.0619384	0.0619861				1084	0.002151	0.275231
AMP	AAB	0.7	1.4	0.7				0	0				0	0		AB	0.3	0.3	0.3		62.963	0.260668	0.11458	0.0035939				1085	0.00710238	0.380108
AMP	AAB	0.7	1.4	0.7				0	0				0	0		AB	0.3	0.3	0.3		62.963	0.260668	0.734645	-0.0135239				1086	0.999472	0.263657
AMP	AAB	0.7	1.4	0.7				0	0				0	0		AB	0.3	0.3	0.3		62.963	0.260668	0.122629	0.0669507				1087	0.00165843	0.246333
AMP	AAB	0.7	1.4	0.7				0	0				0	0		AB	0.3	0.3	0.3		62.963	0.260668	0.591297	-0.0121408				1088	0.617489	0.0855502
AMP	AAB	0.7	1.4	0.7				0	0				0	0		AB	0.3	0.3	0.3		62.963	0.260668	0.843481	-0.00042469				1089	1	0.298858
AMP	AAB	0.7	1.4	0.7				0	0				0	0		AB	0.3	0.3	0.3		62.963	0.260668	0.490015	-0.0592292				1090	0.4296	0.262037
AMP	AAB	0.7	1.4	0.7				0	0				0	0		AB	0.3	0.3	0.3		62.963	0.260668	0.329801	-0.0302912				1091	0.400662	0.138284
AMP	AAB	0.7	1.4	0.7				0	0				0	0		AB	0.3	0.3	0.3		62.963	0.260668	0.351991	0.0697016				1092	0.300669	0.211585
AMP	AAB	0.7	1.4	0.7				0	0				0	0		AB	0.3	0.3	0.3		62.963	0.260668	0.561503	0.00160083				1093	0.63123	0.390292
AMP	AAB	0.7	1.4	0.7				0	0				0	0		AB	0.3	0.3	0.3		62.963	0.260668	0.647862	0.00107611				1094	0.630706	0.263239
AMP	AAB	0.7	1.4	0.7				0	0				0	0		AB	0.3	0.3	0.3		62.963	0.260668	0.418859	0.00461054				1095	0.36576	0.257705
AMP	AAB	0.7	1.4	0.7				0	0				0	0		AB	0.3	0.3	0.3		62.963	0.260668	0.450809	0.00750181				1096	0.362869	0.247931
AMP	AAB	0.7	1.4	0.7				0	0				0	0		AB	0.3	0.3	0.3		62.963	0.260668	0.161063	0.00354776				1097	0.00120826	0.265092
AMP	AAB	0.7	1.4	0.7				0	0				0	0		AB	0.3	0.3	0.3		62.963	0.260668	0.642446	-0.0641439				1098	0.565486	0.270677
AMP	AAB	0.7	1.4	0.7				0	0				0	0		AB	0.3	0.3	0.3		62.963	0.260668	0.695401	-0.00241324				1099	0.627216	0.193667
AMP	AAB	0.7	1.4	0.7				0	0				0	0		AB	0.3	0.3	0.3		62.963	0.260668	0.837627	0.0400695				1100	1	0.265329
AMP	AAB	0.7	1.4	0.7				0	0				0	0		AB	0.3	0.3	0.3		62.963	0.260668	0.971319	-0.0382992				1101	0.992216	0.380358
AMP	AAB	0.7	1.4	0.7				0	0				0	0		AB	0.3	0.3	0.3		62.963	0.260668	0.30873	-0.00922517				1102	0.379596	0.135233
AMP	AAB	0.7	1.4	0.7				0	0				0	0		AB	0.3	0.3	0.3		62.963	0.260668	0.750703	-0.0229038				1103	1	0.23818
AMP	AAB	0.7	1.4	0.7				0	0				0	0		AB	0.3	0.3	0.3		62.963	0.260668	0.253571	0.0538853				1104	0.00580774	0.31995
AMP	AAB	0.7	1.4	0.7				0	0				0	0		AB	0.3	0.3	0.3		62.963	0.260668	0.114075	-0.0160094				1105	0.00614695	0.0344145
AMP	AAB	0.7	1.4	0.7				0	0				0	0		AB	0.3	0.3	0.3		62.963	0.260668	0.351679	0.0797288				1106	0.290642	0.218244
AMP	AAB	0.7	1.4	0.7				0	0				0	0		AB	0.3	0.3	0.3		62.963	0.260668	0.289199	0.0104487				1107	0.0230575	0.594682
AMP	AAB	0.7	1.4	0.7				0	0				0	0		AB	0.3	0.3	0.3		62.963	0.260668	0.623248	-0.00034054				1108	0.629289	0.301989
AMP	AAB	0.7	1.4	0.7				0	0				0	0		AB	0.3	0.3	0.3		62.963	0.260668	0.886728	0.0176257				1109	1	0.260514
AMP	AAB	0.7	1.4	0.7				0	0				0	0		AB	0.3	0.3	0.3		62.963	0.260668	0.0533774	-0.0671704				1110	0.000940811	0.241502
AMP	AAB	0.7	1.4	0.7				0	0				0	0		AB	0.3	0.3	0.3		62.963	0.260668	0.299198	0.0118708				1111	0.0200973	0.288335
AMP	AAB	0.7	1.4	0.7				0	0				0	0		AB	0.3	0.3	0.3		62.963	0.260668	0.869912	0.0167069				1112	0.997935	0.220879
AMP	AAB	0.7	1.4	0.7				0	0				0	0		AB	0.3	0.3	0.3		62.963	0.260668	0.812026	0.00182255				1113	0.997287	0.261185
AMP	AAB	0.7	1.4	0.7				0	0				0	0		AB	0.3	0.3	0.3		62.963	0.260668	0.903488	-0.0781826				1114	0.999671	0.254211
AMP	AAB	0.7	1.4	0.7				0	0				0	0		AB	0.3	0.3	0.3		62.963	0.260668	0.640007	-0.0591225				1115	0.570507	0.511111
AMP	AAB	0.7	1.4	0.7				0	0				0	0		AB	0.3	0.3	0.3		62.963	0.260668	0.0391572	0.0260877				1116	0.00231507	0.369116
AMP	AAB	0.7	1.4	0.7				0	0				0	0		AB	0.3	0.3	0.3		62.963	0.260668	0.29154	-0.000157068				1117	0.0076056	0.226931
AMP	AAB	0.7	1.4	0.7				0	0				0	0		AB	0.3	0.3	0.3		62.963	0.260668	0.448766	-0.00056379				1118	0.370934	0.261087
AMP	AAB	0.7	1.4	0.7				0	0				0	0		AB	0.3	0.3	0.3		62.963	0.260668	0.625321	-0.0082771				1119	0.621353	0.262609
AMP	AAB	0.7	1.4	0.7				0	0				0	0		AB	0.3	0.3	0.3		62.963	0.260668	0.983173	-0.00517569				1120	1	0.261083
AMP	AAB	0.7	1.4	0.7				0	0				0	0		AB	0.3	0.3	0.3		62.963	0.260668	0.234285	0.0104813				1121	0.00121259	0.275113
AMP	AAB	0.7	1.4	0.7				0	0				0	0		AB	0.3	0.3	0.3		62.963	0.260668	0.0736005	0.0567742				1122	0.000771432	0.211452
AMP	AAB	0.7	1.4	0.7				0	0				0	0		AB	0.3	0.3	0.3		62.963	0.260668	0.417288	-0.000448243				1123	0.370819	0.0925705
AMP	AAB	0.7	1.4	0.7				0	0				0	0		AB	0.3	0.3	0.3		62.963	0.260668	0.842595	-0.00671952				1124	1	0.259123
AMP	AAB	0.7	1.4	0.7				0	0				0	0		AB	0.3	0.3	0.3		62.963	0.260668	0.547294	0.0217045				1125	0.651334	0.281179
AMP	AAB	0.7	1.4	0.7				0	0				0	0		AB	0.3	0.3	0.3		62.963	0.260668	0.252577	0.0294316				1126	0.00548206	0.225692
AMP	AAB	0.7	1.4	0.7				0	0				0	0		AB	0.3	0.3	0.3		62.963	0.260668	0.0765334	-0.0230018				1127	0.0022525	0.367832
AMP	AAB	0.7	1.4	0.7				0	0				0	0		AB	0.3	0.3	0.3		62.963	0.260668	0.111024	0.0771614				1128	0.00255375	0.304324
AMP	AAB	0.7	1.4	0.7				0	0				0	0		AB	0.3	0.3	0.3		62.963	0.260668	0.766471	0.0156527				1129	0.988172	0.477512
AMP	AAB	0.7	1.4	0.7				0	0				0	0		AB	0.3	0.3	0.3		62.963	0.260668	0.425992	-0.0071734				1130	0.377544	0.318817
AMP	AAB	0.7	1.4	0.7				0	0				0	0		AB	0.3	0.3	0.3		62.963	0.260668	0.578766	-0.0426199				1131	0.58701	0.291947
AMP	AAB	0.7	1.4	0.7				0	0				0	0		AB	0.3	0.3	0.3		62.963	0.260668	0.821428	0.0231557				1132	1	0.225749
AMP	AAB	0.7	1.4	0.7				0	0				0	0		AB	0.3	0.3	0.3		62.963	0.260668	0.228031	-0.0353505				1133	0.00528022	0.168817
AMP	AAB	0.7	1.4	0.7				0	0				0	0		AB	0.3	0.3	0.3		62.963	0.260668	0.820468	0.001133				1134	1	0.433343
AMP	AAB	0.7	1.4	0.7				0	0				0	0		AB	0.3	0.3	0.3		62.963	0.260668	0.529928	-0.0577085				1135	0.571921	0.259093
AMP	AAB	0.7	1.4	0.7				0	0				0	0		AB	0.3	0.3	0.3		62.963	0.260668	0.853741	0.00462003				1136	1	0.436709
AMP	AAB	0.7	1.4	0.7				0	0				0	0		AB	0.3	0.3	0.3		62.963	0.260668	0.630631	0.00985111				1137	0.639481	0.258672
AMP	AAB	0.7	1.4	0.7				0	0				0	0		AB	0.3	0.3	0.3		62.963	0.260668	0.684361	-0.0115216				1138	0.618108	0.29741
AMP	AAB	0.7	1.4	0.7				0	0				0	0		AB	0.3	0.3	0.3		62.963	0.260668	0.252671	0.00885719				1139	0.00291118	0.249866
AMP	AAB	0.7	1.4	0.7				0	0				0	0		AB	0.3	0.3	0.3		62.963	0.260668	0.188528	-0.00234769				1140	0.00166983	0.269739
AMP	AAB	0.7	1.4	0.7				0	0				0	0		AB	0.3	0.3	0.3		62.963	0.260668	0.0164919	0.0673368				1141	3.87179e-05	0.258312
AMP	AAB	0.7	1.4	0.7				0	0				0	0		AB	0.3	0.3	0.3		62.963	0.260668	0.946206	0.0426184				1142	0.987257	0.0416485
AMP	AAB	0.7	1.4	0.7				0	0				0	0		AB	0.3	0.3	0.3		62.963	0.260668	0.487742	0.0397191				1143	0.330651	0.273577
AMP	AAB	0.7	1.4	0.7				0	0				0	0		AB	0.3	0.3	0.3		62.963	0.260668	0.97897	0.034958				1144	0.992223	0.225472
AMP	AAB	0.7	1.4	0.7				0	0				0	0		AB	0.3	0.3	0.3		62.963	0.260668	0.23671	-0.043441				1145	0.00827491	0.402683
AMP	AAB	0.7	1.4	0.7				0	0				0	0		AB	0.3	0.3	0.3		62.963	0.260668	0.800807	0.039388				1146	1	0.352726
AMP	AAB	0.7	1.4	0.7				0	0				0	0		AB	0.3	0.3	0.3		62.963	0.260668	0.493284	-0.00373081				1147	0.374101	0.4421
AMP	AAB	0.7	1.4	0.7				0	0				0	0		AB	0.3	0.3	0.3		62.963	0.260668	0.946177	0.0295551				1148	1	0.274679
AMP	AAB	0.7	1.4	0.7				0	0				0	0		AB	0.3	0.3	0.3		62.963	0.260668	0.300057	-0.0163845				1149	0.386755	0.263868
AMP	AAB	0.7	1.4	0.7				0	0				0	0		AB	0.3	0.3	0.3		62.963	0.260668	0.199216	0.0284014				1150	0.00326405	0.330533
AMP	AAB	0.7	1.4	0.7				0	0				0	0		AB	0.3	0.3	0.3		62.963	0.260668	0.103058	-0.0254208				1151	0.00292698	0.272499
AMP	AAB	0.7	1.4	0.7				0	0				0	0		AB	0.3	0.3	0.3		62.963	0.260668	0.242599	-0.0246405				1152	0.00616706	0.353897
AMP	AAB	0.7	1.4	0.7				0	0				0	0		AB	0.3	0.3	0.3		62.963	0.260668	0.549266	-0.00368637				1153	0.625943	0.23074
AMP	AAB	0.7	1.4	0.7				0	0				0	0		AB	0.3	0.3	0.3		62.963	0.260668	0.345983	0.0313474				1154	0.339023	0.267743
AMP	AAB	0.7	1.4	0.7				0	0				0	0		AB	0.3	0.3	0.3		62.963	0.260668	0.583581	-0.0094755				1155	0.620154	0.316559
AMP	AAB	0.7	1.4	0.7				0	0				0	0		AB	0.3	0.3	0.3		62.963	0.260668	0.938371	-0.00010904				1156	1	0.273647
AMP	AAB	0.7	1.4	0.7				0	0				0	0		AB	0.3	0.3	0.3		62.963	0.260668	0.603999	-0.000408728				1157	0.629221	0.261008
AMP	AAB	0.7	1.4	0.7				0	0				0	0		AB	0.3	0.3	0.3		62.963	0.260668	0.693919	-0.0229565				1158	0.606673	0.259765
AMP	AAB	0.7	1.4	0.7				0	0				0	0		AB	0.3	0.3	0.3		62.963	0.260668	0.302504	0.00829838				1159	0.362072	0.326767
AMP	AAB	0.7	1.4	0.7				0	0				0	0		AB	0.3	0.3	0.3		62.963	0.260668	0.221485	0.062				1160	0.00183797	0.30158
AMP	AAB	0.7	1.4	0.7				0	0				0	0		AB	0.3	0.3	0.3		62.963	0.260668	0.146466	-0.0388839				1161	0.00908089	0.376831
AMP	AAB	0.7	1.4	0.7				0	0				0	0		AB	0.3	0.3	0.3		62.963	0.260668	0.028814	-0.00132265				1162	0.0011204	0.225293
AMP	AAB	0.7	1.4	0.7				0	0				0	0		AB	0.3	0.3	0.3		62.963	0.260668	0.754713	0.0596924				1163	1	0.256705
AMP	AAB	0.7	1.4	0.7				0	0				0	0		AB	0.3	0.3	0.3		62.963	0.260668	0.4339	-0.011657				1164	0.382027	0.150167
AMP	AAB	0.7	1.4	0.7				0	0				0	0		AB	0.3	0.3	0.3		62.963	0.260668	0.414183	0.00539334				1165	0.364977	0.203167
AMP	AAB	0.7	1.4	0.7				0	0				0	0		AB	0.3	0.3	0.3		62.963	0.260668	0.0605809	-0.0419376				1166	0.000326734	0.254018
AMP	AAB	0.7	1.4	0.7				0	0				0	0		AB	0.3	0.3	0.3		62.963	0.260668	0.493476	0.00318456				1167	0.367186	0.154041
AMP	AAB	0.7	1.4	0.7				0	0				0	0		AB	0.3	0.3	0.3		62.963	0.260668	0.916119	0.0058304				1168	0.999417	0.26092
AMP	AAB	0.7	1.4	0.7				0	0				0	0		AB	0.3	0.3	0.3		62.963	0.260668	0.790628	-0.0202335				1169	0.999078	0.255843
AMP	AAB	0.7	1.4	0.7				0	0				0	0		AB	0.3	0.3	0.3		62.963	0.260668	0.0218085	-0.000421252				1170	0.000441262	0.267103
AMP	AAB	0.7	1.4	0.7				0	0				0	0		AB	0.3	0.3	0.3		62.963	0.260668	0.638275	0.00967555				1171	0.639305	0.261937
AMP	AAB	0.7	1.4	0.7				0	0				0	0		AB	0.3	0.3	0.3		62.963	0.260668	0.526345	-0.00650199				1172	0.623128	0.271533
AMP	AAB	0.7	1.4	0.7				0	0				0	0		AB	0.3	0.3	0.3		62.963	0.260668	0.0235638	-0.0714223				1173	0.000153212	0.277563
AMP	AAB	0.7	1.4	0.7				0	0				0	0		AB	0.3	0.3	0.3		62.963	0.260668	0.297094	0.0041173				1174	0.0212191	0.596634
AMP	AAB	0.7	1.4	0.7				0	0				0	0		AB	0.3	0.3	0.3		62.963	0.260668	0.562667	0.0532251				1175	0.682855	0.278414
AMP	AAB	0.7	1.4	0.7				0	0				0	0		AB	0.3	0.3	0.3		62.963	0.260668	0.825771	-0.00473946				1176	0.99121	0.265025
AMP	AAB	0.7	1.4	0.7				0	0				0	0		AB	0.3	0.3	0.3		62.963	0.260668	0.408858	-0.02108				1177	0.39145	0.247028
AMP	AAB	0.7	1.4	0.7				0	0				0	0		AB	0.3	0.3	0.3		62.963	0.260668	0.815713	-0.00309406				1178	1	0.352678
AMP	AAB	0.7	1.4	0.7				0	0				0	0		AB	0.3	0.3	0.3		62.963	0.260668	0.175627	-0.000138614				1179	0.0005434	0.260226
AMP	AAB	0.7	1.4	0.7				0	0				0	0		AB	0.3	0.3	0.3		62.963	0.260668	0.942596	-0.00268247				1180	1	0.260203
AMP	AAB	0.7	1.4	0.7				0	0				0	0		AB	0.3	0.3	0.3		62.963	0.260668	0.365793	0.0623133				1181	0.308057	0.259175
AMP	AAB	0.7	1.4	0.7				0	0				0	0		AB	0.3	0.3	0.3		62.963	0.260668	0.0390806	-0.00398552				1182	0.00243524	0.343288
AMP	AAB	0.7	1.4	0.7				0	0				0	0		AB	0.3	0.3	0.3		62.963	0.260668	0.582053	0.061841				1183	0.691471	0.26121
AMP	AAB	0.7	1.4	0.7				0	0				0	0		AB	0.3	0.3	0.3		62.963	0.260668	0.432007	-0.063406				1184	0.433776	0.0522549
AMP	AAB	0.7	1.4	0.7				0	0				0	0		AB	0.3	0.3	0.3		62.963	0.260668	0.733543	0.0242186				1185	1	0.0130291
AMP	AAB	0.7	1.4	0.7				0	0				0	0		AB	0.3	0.3	0.3		62.963	0.260668	0.966981	0.0705757				1186	0.995316	0.348912
AMP	AAB	0.7	1.4	0.7				0	0				0	0		AB	0.3	0.3	0.3		62.963	0.260668	0.583995	-0.0123818				1187	0.617248	0.298361
AMP	AAB	0.7	1.4	0.7				0	0				0	0		AB	0.3	0.3	0.3		62.963	0.260668	0.0400904	0.0270489				1188	0.00049639	0.275012
AMP	AAB	0.7	1.4	0.7				0	0				0	0		AB	0.3	0.3	0.3		62.963	0.260668	0.297919	-0.00933806				1189	0.00805839	0.31586
AMP	AAB	0.7	1.4	0.7				0	0				0	0		AB	0.3	0.3	0.3		62.963	0.260668	0.610245	0.00134594				1190	0.630976	0.218829
AMP	AAB	0.7	1.4	0.7				0	0				0	0		AB	0.3	0.3	0.3		62.963	0.260668	0.911203	0.00215895				1191	0.999755	0.262112
AMP	AAB	0.7	1.4	0.7				0	0				0	0		AB	0.3	0.3	0.3		62.963	0.260668	0.423508	0.019632				1192	0.350738	0.266089
AMP	AAB	0.7	1.4	0.7				0	0				0	0		AB	0.3	0.3	0.3		62.963	0.260668	0.244268	0.0359395				1193	0.00479547	0.266163
AMP	AAB	0.7	1.4	0.7				0	0				0	0		AB	0.3	0.3	0.3		62.963	0.260668	0.811563	-0.0474143				1194	0.994167	0.139537
AMP	AAB	0.7	1.4	0.7				0	0				0	0		AB	0.3	0.3	0.3		62.963	0.260668	0.977658	-0.0131438				1195	1	0.0781499
AMP	AAB	0.7	1.4	0.7				0	0				0	0		AB	0.3	0.3	0.3		62.963	0.260668	0.0454011	-0.0342283				1196	0.000596742	0.219914
AMP	AAB	0.7	1.4	0.7				0	0				0	0		AB	0.3	0.3	0.3		62.963	0.260668	0.154703	-0.0115059				1197	0.00529523	0.110756
AMP	AAB	0.7	1.4	0.7				0	0				0	0		AB	0.3	0.3	0.3		62.963	0.260668	0.707085	-0.0123283				1198	1	0.238392
AMP	AAB	0.7	1.4	0.7				0	0				0	0		AB	0.3	0.3	0.3		62.963	0.260668	0.881337	-0.0202072				1199	1	0.249861
AMP	AAB	0.7	1.4	0.7				0	0				0	0		AB	0.3	0.3	0.3		62.963	0.260668	0.838497	0.00802365				1200	1	0.345413
AMP	AAB	0.7	1.4	0.7				0	0				0	0		AB	0.3	0.3	0.3		62.963	0.260668	0.607453	-0.0604786				1201	0.569151	0.252269
AMP	AAB	0.7	1.4	0.7				0	0				0	0		AB	0.3	0.3	0.3		62.963	0.260668	0.974143	0.00959185				1202	1	0.0891179
AMP	AAB	0.7	1.4	0.7				0	0				0	0		AB	0.3	0.3	0.3		62.963	0.260668	0.0881743	0.0288203				1203	0.000845755	0.21684
AMP	AAB	0.7	1.4	0.7				0	0				0	0		AB	0.3	0.3	0.3		62.963	0.260668	0.826827	-0.0174363				1204	0.995234	0.30378
AMP	AAB	0.7	1.4	0.7				0	0				0	0		AB	0.3	0.3	0.3		62.963	0.260668	0.435545	-0.0168863				1205	0.387257	0.255255
AMP	AAB	0.7	1.4	0.7				0	0				0	0		AB	0.3	0.3	0.3		62.963	0.260668	0.320984	0.00457109				1206	0.365799	0.212431
AMP	AAB	0.7	1.4	0.7				0	0				0	0		AB	0.3	0.3	0.3		62.963	0.260668	0.835332	0.0487802				1207	0.999236	0.248897
AMP	AAB	0.7	1.4	0.7				0	0				0	0		AB	0.3	0.3	0.3		62.963	0.260668	0.72587	0.0388996				1208	0.992918	0.104646
AMP	AAB	0.7	1.4	0.7				0	0				0	0		AB	0.3	0.3	0.3		62.963	0.260668	0.0769172	-0.0280109				1209	0.00299204	0.262815
AMP	AAB	0.7	1.4	0.7				0	0				0	0		AB	0.3	0.3	0.3		62.963	0.260668	0.602215	0.0514065				1210	0.681036	0.229254
AMP	AAB	0.7	1.4	0.7				0	0				0	0		AB	0.3	0.3	0.3		62.963	0.260668	0.632934	-0.0581722				1211	0.571457	0.469414
AMP	AAB	0.7	1.4	0.7				0	0				0	0		AB	0.3	0.3	0.3		62.963	0.260668	0.0599573	-0.00151156				1212	0.00348785	0.424844
AMP	AAB	0.7	1.4	0.7				0	0				0	0		AB	0.3	0.3	0.3		62.963	0.260668	0.0751629	-0.0498402				1213	0.000113613	0.262205
AMP	AAB	0.7	1.4	0.7				0	0				0	0		AB	0.3	0.3	0.3		62.963	0.260668	0.43207	0.000507363				1214	0.369863	0.237284
AMP	AAB	0.7	1.4	0.7				0	0				0	0		AB	0.3	0.3	0.3		62.963	0.260668	0.933586	0.00742328				1215	0.999905	0.261777
AMP	AAB	0.7	1.4	0.7				0	0				0	0		AB	0.3	0.3	0.3		62.963	0.260668	0.667072	-0.0212284				1216	0.608401	0.229438
AMP	AAB	0.7	1.4	0.7				0	0				0	0		AB	0.3	0.3	0.3		62.963	0.260668	0.805948	-0.0455512				1217	1	0.299937
AMP	AAB	0.7	1.4	0.7				0	0				0	0		AB	0.3	0.3	0.3		62.963	0.260668	0.0495652	0.0064112				1218	0.00225775	0.350487
AMP	AAB	0.7	1.4	0.7				0	0				0	0		AB	0.3	0.3	0.3		62.963	0.260668	0.545342	0.00446594				1219	0.634096	0.255612
AMP	AAB	0.7	1.4	0.7				0	0				0	0		AB	0.3	0.3	0.3		62.963	0.260668	0.585552	0.00165983				1220	0.631289	0.24957
AMP	AAB	0.7	1.4	0.7				0	0				0	0		AB	0.3	0.3	0.3		62.963	0.260668	0.280904	0.0192731				1221	0.000466253	0.261113
AMP	AAB	0.7	1.4	0.7				0	0				0	0		AB	0.3	0.3	0.3		62.963	0.260668	0.00354529	-0.0425741				1222	6.83288e-05	0.26995
AMP	AAB	0.7	1.4	0.7				0	0				0	0		AB	0.3	0.3	0.3		62.963	0.260668	0.70754	-0.0111647				1223	1	0.425276
AMP	AAB	0.7	1.4	0.7				0	0				0	0		AB	0.3	0.3	0.3		62.963	0.260668	0.319683	-0.070909				1224	0.441279	0.271186
AMP	AAB	0.7	1.4	0.7				0	0				0	0		AB	0.3	0.3	0.3		62.963	0.260668	0.729086	-0.0328754				1225	1	0.145288
AMP	AAB	0.7	1.4	0.7				0	0				0	0		AB	0.3	0.3	0.3		62.963	0.260668	0.0885438	-0.014526				1226	0.00291091	0.184813
AMP	AAB	0.7	1.4	0.7				0	0				0	0		AB	0.3	0.3	0.3		62.963	0.260668	0.626546	0.00618375				1227	0.635813	0.333413
AMP	AAB	0.7	1.4	0.7				0	0				0	0		AB	0.3	0.3	0.3		62.963	0.260668	0.679942	0.0601095				1228	0.689739	0.267476
AMP	AAB	0.7	1.4	0.7				0	0				0	0		AB	0.3	0.3	0.3		62.963	0.260668	0.179911	0.0302563				1229	0.0108143	0.309132
AMP	AAB	0.7	1.4	0.7				0	0				0	0		AB	0.3	0.3	0.3		62.963	0.260668	0.596009	0.0227578				1230	0.652387	0.353511
AMP	AAB	0.7	1.4	0.7				0	0				0	0		AB	0.3	0.3	0.3		62.963	0.260668	0.246628	0.0431963				1231	0.00561271	0.173962
AMP	AAB	0.7	1.4	0.7				0	0				0	0		AB	0.3	0.3	0.3		62.963	0.260668	0.656916	-0.0311181				1232	0.598512	0.0482292
AMP	AAB	0.7	1.4	0.7				0	0				0	0		AB	0.3	0.3	0.3		62.963	0.260668	0.0807837	0.0180109				1233	0.00251383	0.359332
AMP	AAB	0.7	1.4	0.7				0	0				0	0		AB	0.3	0.3	0.3		62.963	0.260668	0.400352	0.00384737				1234	0.366523	0.302046
AMP	AAB	0.7	1.4	0.7				0	0				0	0		AB	0.3	0.3	0.3		62.963	0.260668	0.576553	-0.0262957				1235	0.603334	0.273103
AMP	AAB	0.7	1.4	0.7				0	0				0	0		AB	0.3	0.3	0.3		62.963	0.260668	0.718084	0.0111539				1236	1	0.339816
AMP	AAB	0.7	1.4	0.7				0	0				0	0		AB	0.3	0.3	0.3		62.963	0.260668	0.675783	-0.00250374				1237	0.627126	0.301678
AMP	AAB	0.7	1.4	0.7				0	0				0	0		AB	0.3	0.3	0.3		62.963	0.260668	0.493284	-0.000263228				1238	0.370634	0.272451
AMP	AAB	0.7	1.4	0.7				0	0				0	0		AB	0.3	0.3	0.3		62.963	0.260668	0.636512	0.0410897				1239	0.670719	0.259356
AMP	AAB	0.7	1.4	0.7				0	0				0	0		AB	0.3	0.3	0.3		62.963	0.260668	0.333607	0.0097571				1240	0.360613	0.131568
AMP	AAB	0.7	1.4	0.7				0	0				0	0		AB	0.3	0.3	0.3		62.963	0.260668	0.693874	-0.0835501				1241	0.54608	0.291388
AMP	AAB	0.7	1.4	0.7				0	0				0	0		AB	0.3	0.3	0.3		62.963	0.260668	0.315389	0.0270498				1242	0.343321	0.0706515
AMP	AAB	0.7	1.4	0.7				0	0				0	0		AB	0.3	0.3	0.3		62.963	0.260668	0.915795	-0.0277832				1243	0.995046	0.137089
AMP	AAB	0.7	1.4	0.7				0	0				0	0		AB	0.3	0.3	0.3		62.963	0.260668	0.0075903	0.0188263				1244	0.000210882	0.343144
AMP	AAB	0.7	1.4	0.7				0	0				0	0		AB	0.3	0.3	0.3		62.963	0.260668	0.414593	0.0905022				1245	0.279868	0.3334
AMP	AAB	0.7	1.4	0.7				0	0				0	0		AB	0.3	0.3	0.3		62.963	0.260668	0.969759	0.0225429				1246	0.982447	-0.0228353
AMP	AAB	0.7	1.4	0.7				0	0				0	0		AB	0.3	0.3	0.3		62.963	0.260668	0.975526	-0.00936656				1247	0.995602	0.179697
AMP	AAB	0.7	1.4	0.7				0	0				0	0		AB	0.3	0.3	0.3		62.963	0.260668	0.728181	0.0189287				1248	1	0.280138
AMP	AAB	0.7	1.4	0.7				0	0				0	0		AB	0.3	0.3	0.3		62.963	0.260668	0.912968	0.000517146				1249	0.996544	0.212851
AMP	AAB	0.7	1.4	0.7				0	0				0	0		AB	0.3	0.3	0.3		62.963	0.260668	0.932359	-0.0193064				1250	0.999904	0.261867
AMP	AAB	0.7	1.4	0.7				0	0				0	0		AB	0.3	0.3	0.3		62.963	0.260668	0.609552	0.000956842				1251	0.630586	0.21106
AMP	AAB	0.7	1.4	0.7				0	0				0	0		AB	0.3	0.3	0.3		62.963	0.260668	0.0169133	0.010382				1252	1.61833e-05	0.25702
AMP	AAB	0.7	1.4	0.7				0	0				0	0		AB	0.3	0.3	0.3		62.963	0.260668	0.0444294	0.00023801				1253	0.000461266	0.267881
AMP	AAB	0.7	1.4	0.7				0	0				0	0		AB	0.3	0.3	0.3		62.963	0.260668	0.779617	0.00128613				1254	0.999963	0.261605
AMP	AAB	0.7	1.4	0.7				0	0				0	0		AB	0.3	0.3	0.3		62.963	0.260668	0.36961	-0.0573876				1255	0.427758	0.258904
AMP	AAB	0.7	1.4	0.7				0	0				0	0		AB	0.3	0.3	0.3		62.963	0.260668	0.154334	0.0020094				1256	0.00885688	0.14945
AMP	AAB	0.7	1.4	0.7				0	0				0	0		AB	0.3	0.3	0.3		62.963	0.260668	0.583981	-0.0380724				1257	0.591557	0.252174
AMP	AAB	0.7	1.4	0.7				0	0				0	0		AB	0.3	0.3	0.3		62.963	0.260668	0.0734429	-0.0136436				1258	0.00279615	0.348129
AMP	AAB	0.7	1.4	0.7				0	0				0	0		AB	0.3	0.3	0.3		62.963	0.260668	0.230828	0.066149				1259	0.00314932	0.255082
AMP	AAB	0.7	1.4	0.7				0	0				0	0		AB	0.3	0.3	0.3		62.963	0.260668	0.719528	-0.00595786				1260	0.990481	-0.0689792
AMP	AAB	0.7	1.4	0.7				0	0				0	0		AB	0.3	0.3	0.3		62.963	0.260668	0.0461645	0.000325014				1261	0.000275041	0.283381
AMP	AAB	0.7	1.4	0.7				0	0				0	0		AB	0.3	0.3	0.3		62.963	0.260668	0.0947372	-0.0542462				1262	3.07909e-05	0.259184
AMP	AAB	0.7	1.4	0.7				0	0				0	0		AB	0.3	0.3	0.3		62.963	0.260668	0.790977	0.00370863				1263	1	0.180953
AMP	AAB	0.7	1.4	0.7				0	0				0	0		AB	0.3	0.3	0.3		62.963	0.260668	0.654979	0.000385871				1264	0.630016	0.248121
AMP	AAB	0.7	1.4	0.7				0	0				0	0		AB	0.3	0.3	0.3		62.963	0.260668	0.492969	0.0130982				1265	0.357272	0.259322
AMP	AAB	0.7	1.4	0.7				0	0				0	0		AB	0.3	0.3	0.3		62.963	0.260668	0.309811	-0.0775614				1266	0.447932	0.268791
AMP	AAB	0.7	1.4	0.7				0	0				0	0		AB	0.3	0.3	0.3		62.963	0.260668	0.401636	0.00203923				1267	0.368331	0.0967584
AMP	AAB	0.7	1.4	0.7				0	0				0	0		AB	0.3	0.3	0.3		62.963	0.260668	0.281581	0.00953857				1268	0.000574209	0.264181
AMP	AAB	0.7	1.4	0.7				0	0				0	0		AB	0.3	0.3	0.3		62.963	0.260668	0.927069	0.048487				1269	0.998231	0.227072
AMP	AAB	0.7	1.4	0.7				0	0				0	0		AB	0.3	0.3	0.3		62.963	0.260668	0.451905	-0.0402819				1270	0.410652	0.427995
AMP	AAB	0.7	1.4	0.7				0	0				0	0		AB	0.3	0.3	0.3		62.963	0.260668	0.334133	-0.0449453				1271	0.415316	0.451126
AMP	AAB	0.7	1.4	0.7				0	0				0	0		AB	0.3	0.3	0.3		62.963	0.260668	0.371144	0.0396209				1272	0.33075	0.318433
AMP	AAB	0.7	1.4	0.7				0	0				0	0		AB	0.3	0.3	0.3		62.963	0.260668	0.915885	0.0184177				1273	0.992742	0.263023
AMP	AAB	0.7	1.4	0.7				0	0				0	0		AB	0.3	0.3	0.3		62.963	0.260668	0.831273	0.0192393				1274	0.996938	0.202593
AMP	AAB	0.7	1.4	0.7				0	0				0	0		AB	0.3	0.3	0.3		62.963	0.260668	0.920935	0.0516618				1275	0.996456	0.310657
AMP	AAB	0.7	1.4	0.7				0	0				0	0		AB	0.3	0.3	0.3		62.963	0.260668	0.996971	0.0249611				1276	0.989699	0.0665046
AMP	AAB	0.7	1.4	0.7				0	0				0	0		AB	0.3	0.3	0.3		62.963	0.260668	0.237376	0.0116742				1277	0.00592517	0.293362
AMP	AAB	0.7	1.4	0.7				0	0				0	0		AB	0.3	0.3	0.3		62.963	0.260668	0.347301	-0.00576928				1278	0.37614	0.229554
AMP	AAB	0.7	1.4	0.7				0	0				0	0		AB	0.3	0.3	0.3		62.963	0.260668	0.333698	0.00231779				1279	0.368053	0.289104
AMP	AAB	0.7	1.4	0.7				0	0				0	0		AB	0.3	0.3	0.3		62.963	0.260668	0.552466	-0.0380843				1280	0.591545	0.24999
AMP	AAB	0.7	1.4	0.7				0	0				0	0		AB	0.3	0.3	0.3		62.963	0.260668	0.830791	-0.000104475				1281	1	0.265
AMP	AAB	0.7	1.4	0.7				0	0				0	0		AB	0.3	0.3	0.3		62.963	0.260668	0.843681	-0.0185086				1282	1	0.26043
AMP	AAB	0.7	1.4	0.7				0	0				0	0		AB	0.3	0.3	0.3		62.963	0.260668	0.209845	-0.0203486				1283	0.00388393	0.254816
AMP	AAB	0.7	1.4	0.7				0	0				0	0		AB	0.3	0.3	0.3		62.963	0.260668	0.587808	-0.00661292				1284	0.623017	0.294668
AMP	AAB	0.7	1.4	0.7				0	0				0	0		AB	0.3	0.3	0.3		62.963	0.260668	0.436055	-0.044763				1285	0.415133	0.250294
AMP	AAB	0.7	1.4	0.7				0	0				0	0		AB	0.3	0.3	0.3		62.963	0.260668	0.889679	0.0240324				1286	1	0.131012
AMP	AAB	0.7	1.4	0.7				0	0				0	0		AB	0.3	0.3	0.3		62.963	0.260668	0.294215	-0.0348546				1287	0.00707069	0.235086
AMP	AAB	0.7	1.4	0.7				0	0				0	0		AB	0.3	0.3	0.3		62.963	0.260668	0.142752	-0.0861439				1288	0.00497558	0.391302
AMP	AAB	0.7	1.4	0.7				0	0				0	0		AB	0.3	0.3	0.3		62.963	0.260668	0.281477	-0.00493259				1289	0.0242475	0.157082
AMP	AAB	0.7	1.4	0.7				0	0				0	0		AB	0.3	0.3	0.3		62.963	0.260668	0.788174	0.00100414				1290	1	0.274501
AMP	AAB	0.7	1.4	0.7				0	0				0	0		AB	0.3	0.3	0.3		62.963	0.260668	0.138576	-0.0425606				1291	0.000139151	0.265279
AMP	AAB	0.7	1.4	0.7				0	0				0	0		AB	0.3	0.3	0.3		62.963	0.260668	0.636427	0.0140867				1292	0.643716	0.148018
AMP	AAB	0.7	1.4	0.7				0	0				0	0		AB	0.3	0.3	0.3		62.963	0.260668	0.493511	0.023338				1293	0.347032	0.246711
AMP	AAB	0.7	1.4	0.7				0	0				0	0		AB	0.3	0.3	0.3		62.963	0.260668	0.939757	0.0129998				1294	0.995614	0.288641
AMP	AAB	0.7	1.4	0.7				0	0				0	0		AB	0.3	0.3	0.3		62.963	0.260668	0.762786	0.00283764				1295	0.998017	0.296666
AMP	AAB	0.7	1.4	0.7				0	0				0	0		AB	0.3	0.3	0.3		62.963	0.260668	0.60096	-0.0116899				1296	0.61794	0.260879
AMP	AAB	0.7	1.4	0.7				0	0				0	0		AB	0.3	0.3	0.3		62.963	0.260668	0.911456	0.0217258				1297	1	0.261003
AMP	AAB	0.7	1.4	0.7				0	0				0	0		AB	0.3	0.3	0.3		62.963	0.260668	0.405206	-0.00378703				1298	0.374157	0.315074
AMP	AAB	0.7	1.4	0.7				0	0				0	0		AB	0.3	0.3	0.3		62.963	0.260668	0.831266	0.00771231				1299	1	0.262209
AMP	AAB	0.7	1.4	0.7				0	0				0	0		AB	0.3	0.3	0.3		62.963	0.260668	0.0818972	-0.00881465				1300	0.000631616	0.248057
AMP	AAB	0.7	1.4	0.7				0	0				0	0		AB	0.3	0.3	0.3		62.963	0.260668	0.577186	0.0610497				1301	0.690679	0.285948
AMP	AAB	0.7	1.4	0.7				0	0				0	0		AB	0.3	0.3	0.3		62.963	0.260668	0.240964	-0.00469688				1302	0.0147108	0.202534
AMP	AAB	0.7	1.4	0.7				0	0				0	0		AB	0.3	0.3	0.3		62.963	0.260668	0.294402	0.00216241				1303	0.00138277	0.271802
AMP	AAB	0.7	1.4	0.7				0	0				0	0		AB	0.3	0.3	0.3		62.963	0.260668	0.44217	0.00276823				1304	0.367602	0.271221
AMP	AAB	0.7	1.4	0.7				0	0				0	0		AB	0.3	0.3	0.3		62.963	0.260668	0.14218	0.00271139				1305	0.000393586	0.262063
AMP	AAB	0.7	1.4	0.7				0	0				0	0		AB	0.3	0.3	0.3		62.963	0.260668	0.4116	0.00143379				1306	0.368937	0.260701
AMP	AAB	0.7	1.4	0.7				0	0				0	0		AB	0.3	0.3	0.3		62.963	0.260668	0.170613	0.0288438				1307	0.000244623	0.256499
AMP	AAB	0.7	1.4	0.7				0	0				0	0		AB	0.3	0.3	0.3		62.963	0.260668	0.565088	-0.00533411				1308	0.624296	0.380012
AMP	AAB	0.7	1.4	0.7				0	0				0	0		AB	0.3	0.3	0.3		62.963	0.260668	0.648329	-0.0213511				1309	0.608279	0.283886
AMP	AAB	0.7	1.4	0.7				0	0				0	0		AB	0.3	0.3	0.3		62.963	0.260668	0.834561	-0.0485159				1310	1	0.36096
AMP	AAB	0.7	1.4	0.7				0	0				0	0		AB	0.3	0.3	0.3		62.963	0.260668	0.929278	-0.0393474				1311	1	0.371934
AMP	AAB	0.7	1.4	0.7				0	0				0	0		AB	0.3	0.3	0.3		62.963	0.260668	0.886163	0.0710843				1312	1	0.243564
AMP	AAB	0.7	1.4	0.7				0	0				0	0		AB	0.3	0.3	0.3		62.963	0.260668	0.796803	0.0544234				1313	0.988672	0.522868
AMP	AAB	0.7	1.4	0.7				0	0				0	0		AB	0.3	0.3	0.3		62.963	0.260668	0.806068	-0.0166664				1314	0.991226	0.220598
AMP	AAB	0.7	1.4	0.7				0	0				0	0		AB	0.3	0.3	0.3		62.963	0.260668	0.681652	-0.0128733				1315	0.616756	0.328908
AMP	AAB	0.7	1.4	0.7				0	0				0	0		AB	0.3	0.3	0.3		62.963	0.260668	0.193887	0.0258919				1316	0.00249596	0.233462
AMP	AAB	0.7	1.4	0.7				0	0				0	0		AB	0.3	0.3	0.3		62.963	0.260668	0.444898	-0.00288584				1317	0.373256	0.230913
AMP	AAB	0.7	1.4	0.7				0	0				0	0		AB	0.3	0.3	0.3		62.963	0.260668	0.846814	0.0251668				1318	1	0.265636
AMP	AAB	0.7	1.4	0.7				0	0				0	0		AB	0.3	0.3	0.3		62.963	0.260668	0.423168	0.0385945				1319	0.331776	0.368322
AMP	AAB	0.7	1.4	0.7				0	0				0	0		AB	0.3	0.3	0.3		62.963	0.260668	0.196134	-0.0269447				1320	0.00756972	0.355012
AMP	AAB	0.7	1.4	0.7				0	0				0	0		AB	0.3	0.3	0.3		62.963	0.260668	0.338332	0.0146363				1321	0.355734	0.19409
AMP	AAB	0.7	1.4	0.7				0	0				0	0		AB	0.3	0.3	0.3		62.963	0.260668	0.0100962	-0.0163329				1322	0.000147771	0.284829
AMP	AAB	0.7	1.4	0.7				0	0				0	0		AB	0.3	0.3	0.3		62.963	0.260668	0.607821	-0.0303712				1323	0.599258	0.250917
AMP	AAB	0.7	1.4	0.7				0	0				0	0		AB	0.3	0.3	0.3		62.963	0.260668	0.364533	-0.0318086				1324	0.402179	0.344149
AMP	AAB	0.7	1.4	0.7				0	0				0	0		AB	0.3	0.3	0.3		62.963	0.260668	0.514747	-0.0312579				1325	0.598372	0.26468
AMP	AAB	0.7	1.4	0.7				0	0				0	0		AB	0.3	0.3	0.3		62.963	0.260668	0.0384804	-0.010618				1326	0.00120282	0.369221
AMP	AAB	0.7	1.4	0.7				0	0				0	0		AB	0.3	0.3	0.3		62.963	0.260668	0.418967	-0.00729464				1327	0.377665	0.285458
AMP	AAB	0.7	1.4	0.7				0	0				0	0		AB	0.3	0.3	0.3		62.963	0.260668	0.187453	0.00897796				1328	0.00136741	0.234563
AMP	AAB	0.7	1.4	0.7				0	0				0	0		AB	0.3	0.3	0.3		62.963	0.260668	0.393224	0.0371336				1329	0.333237	0.257754
AMP	AAB	0.7	1.4	0.7				0	0				0	0		AB	0.3	0.3	0.3		62.963	0.260668	0.347871	-0.00228553				1330	0.372656	0.138075
AMP	AAB	0.7	1.4	0.7				0	0				0	0		AB	0.3	0.3	0.3		62.963	0.260668	0.118594	-0.0204112				1331	0.00027105	0.263907
AMP	AAB	0.7	1.4	0.7				0	0				0	0		AB	0.3	0.3	0.3		62.963	0.260668	0.361693	0.00719958				1332	0.363171	0.176224
AMP	AAB	0.7	1.4	0.7				0	0				0	0		AB	0.3	0.3	0.3		62.963	0.260668	0.804227	0.080848				1333	0.998842	0.226332
AMP	AAB	0.7	1.4	0.7				0	0				0	0		AB	0.3	0.3	0.3		62.963	0.260668	0.442748	0.0104772				1334	0.359893	0.00416485
AMP	AAB	0.7	1.4	0.7				0	0				0	0		AB	0.3	0.3	0.3		62.963	0.260668	0.385848	-0.0275196				1335	0.39789	0.226988
AMP	AAB	0.7	1.4	0.7				0	0				0	0		AB	0.3	0.3	0.3		62.963	0.260668	0.343634	0.0339027				1336	0.336468	0.165608
AMP	AAB	0.7	1.4	0.7				0	0				0	0		AB	0.3	0.3	0.3		62.963	0.260668	0.392269	0.00274378				1337	0.367627	0.185405
AMP	AAB	0.7	1.4	0.7				0	0				0	0		AB	0.3	0.3	0.3		62.963	0.260668	0.20487	-0.0168454				1338	0.000562119	0.264587
AMP	AAB	0.7	1.4	0.7				0	0				0	0		AB	0.3	0.3	0.3		62.963	0.260668	0.729118	-0.00392931				1339	1	0.29916
AMP	AAB	0.7	1.4	0.7				0	0				0	0		AB	0.3	0.3	0.3		62.963	0.260668	0.633473	-0.0099296				1340	0.6197	0.243843
AMP	AAB	0.7	1.4	0.7				0	0				0	0		AB	0.3	0.3	0.3		62.963	0.260668	0.113256	-6.86506e-06				1341	0.00112459	0.298485
AMP	AAB	0.7	1.4	0.7				0	0				0	0		AB	0.3	0.3	0.3		62.963	0.260668	0.936224	-0.0719692				1342	1	0.260649
AMP	AAB	0.7	1.4	0.7				0	0				0	0		AB	0.3	0.3	0.3		62.963	0.260668	0.179222	-0.0312096				1343	0.0128984	0.587546
AMP	AAB	0.7	1.4	0.7				0	0				0	0		AB	0.3	0.3	0.3		62.963	0.260668	0.74963	-0.00711758				1344	1	0.277934
AMP	AAB	0.7	1.4	0.7				0	0				0	0		AB	0.3	0.3	0.3		62.963	0.260668	0.571142	-0.0254494				1345	0.60418	0.29095
AMP	AAB	0.7	1.4	0.7				0	0				0	0		AB	0.3	0.3	0.3		62.963	0.260668	0.835035	-0.000961188				1346	1	0.269843
AMP	AAB	0.7	1.4	0.7				0	0				0	0		AB	0.3	0.3	0.3		62.963	0.260668	0.669626	0.00521162				1347	0.634841	0.25786
AMP	AAB	0.7	1.4	0.7				0	0				0	0		AB	0.3	0.3	0.3		62.963	0.260668	0.8111	0.0473164				1348	0.999155	0.2738
AMP	AAB	0.7	1.4	0.7				0	0				0	0		AB	0.3	0.3	0.3		62.963	0.260668	0.403947	-0.0211771				1349	0.391547	0.112868
AMP	AAB	0.7	1.4	0.7				0	0				0	0		AB	0.3	0.3	0.3		62.963	0.260668	0.570156	0.00216088				1350	0.631791	0.289327
AMP	AAB	0.7	1.4	0.7				0	0				0	0		AB	0.3	0.3	0.3		62.963	0.260668	0.866217	-0.0598182				1351	0.999626	0.267361
AMP	AAB	0.7	1.4	0.7				0	0				0	0		AB	0.3	0.3	0.3		62.963	0.260668	0.332103	0.0862266				1352	0.284144	0.320962
AMP	AAB	0.7	1.4	0.7				0	0				0	0		AB	0.3	0.3	0.3		62.963	0.260668	0.354201	0.0064753				1353	0.363895	0.635273
AMP	AAB	0.7	1.4	0.7				0	0				0	0		AB	0.3	0.3	0.3		62.963	0.260668	0.80343	-0.00198966				1354	0.99896	0.253569
AMP	AAB	0.7	1.4	0.7				0	0				0	0		AB	0.3	0.3	0.3		62.963	0.260668	0.294204	0.0834659				1355	0.000585365	0.258329
AMP	AAB	0.7	1.4	0.7				0	0				0	0		AB	0.3	0.3	0.3		62.963	0.260668	0.568338	-0.00135159				1356	0.628278	0.245395
AMP	AAB	0.7	1.4	0.7				0	0				0	0		AB	0.3	0.3	0.3		62.963	0.260668	0.42531	-0.034043				1357	0.404413	0.262894
AMP	AAB	0.7	1.4	0.7				0	0				0	0		AB	0.3	0.3	0.3		62.963	0.260668	0.946445	-0.00145745				1358	1	0.380441
AMP	AAB	0.7	1.4	0.7				0	0				0	0		AB	0.3	0.3	0.3		62.963	0.260668	0.0319187	0.00268568				1359	4.652e-05	0.257429
AMP	AAB	0.7	1.4	0.7				0	0				0	0		AB	0.3	0.3	0.3		62.963	0.260668	0.28131	-0.0142891				1360	0.000755509	0.266303
AMP	AAB	0.7	1.4	0.7				0	0				0	0		AB	0.3	0.3	0.3		62.963	0.260668	0.972881	-0.0482888				1361	1	0.229149
AMP	AAB	0.7	1.4	0.7				0	0				0	0		AB	0.3	0.3	0.3		62.963	0.260668	0.0706699	0.0100598				1362	0.00341256	0.0849085
AMP	AAB	0.7	1.4	0.7				0	0				0	0		AB	0.3	0.3	0.3		62.963	0.260668	0.334243	-0.015744				1363	0.386114	0.285722
AMP	AAB	0.7	1.4	0.7				0	0				0	0		AB	0.3	0.3	0.3		62.963	0.260668	0.073078	0.00190592				1364	0.00115054	0.190609
AMP	AAB	0.7	1.4	0.7				0	0				0	0		AB	0.3	0.3	0.3		62.963	0.260668	0.88962	-0.0191693				1365	0.999661	0.262284
AMP	AAB	0.7	1.4	0.7				0	0				0	0		AB	0.3	0.3	0.3		62.963	0.260668	0.970279	-0.0256957				1366	1	0.322233
AMP	AAB	0.7	1.4	0.7				0	0				0	0		AB	0.3	0.3	0.3		62.963	0.260668	0.468402	0.00864145				1367	0.361729	0.281359
AMP	AAB	0.7	1.4	0.7				0	0				0	0		AB	0.3	0.3	0.3		62.963	0.260668	0.994442	-0.00912124				1368	0.998281	0.238325
AMP	AAB	0.7	1.4	0.7				0	0				0	0		AB	0.3	0.3	0.3		62.963	0.260668	0.186522	-0.0435909				1369	0.00170131	0.240713
AMP	AAB	0.7	1.4	0.7				0	0				0	0		AB	0.3	0.3	0.3		62.963	0.260668	0.0277086	-0.0582951				1370	0.00120784	0.464634
AMP	AAB	0.7	1.4	0.7				0	0				0	0		AB	0.3	0.3	0.3		62.963	0.260668	0.518063	0.049386				1371	0.679016	0.0596389
AMP	AAB	0.7	1.4	0.7				0	0				0	0		AB	0.3	0.3	0.3		62.963	0.260668	0.610082	-0.0128616				1372	0.616768	0.121075
AMP	AAB	0.7	1.4	0.7				0	0				0	0		AB	0.3	0.3	0.3		62.963	0.260668	0.901129	0.0265838				1373	1	0.23306
AMP	AAB	0.7	1.4	0.7				0	0				0	0		AB	0.3	0.3	0.3		62.963	0.260668	0.203069	-0.0223941				1374	0.00539834	0.272679
AMP	AAB	0.7	1.4	0.7				0	0				0	0		AB	0.3	0.3	0.3		62.963	0.260668	0.978934	-0.0809457				1375	1	0.327643
AMP	AAB	0.7	1.4	0.7				0	0				0	0		AB	0.3	0.3	0.3		62.963	0.260668	0.592262	-0.0183034				1376	0.611326	0.518083
AMP	AAB	0.7	1.4	0.7				0	0				0	0		AB	0.3	0.3	0.3		62.963	0.260668	0.660129	0.0171642				1377	0.646794	0.294048
AMP	AAB	0.7	1.4	0.7				0	0				0	0		AB	0.3	0.3	0.3		62.963	0.260668	0.322408	0.0175802				1378	0.35279	0.266955
AMP	AAB	0.7	1.4	0.7				0	0				0	0		AB	0.3	0.3	0.3		62.963	0.260668	0.0690556	-0.0801819				1379	0.00121401	0.275519
AMP	AAB	0.7	1.4	0.7				0	0				0	0		AB	0.3	0.3	0.3		62.963	0.260668	0.497289	0.0136519				1380	0.356718	0.322843
AMP	AAB	0.7	1.4	0.7				0	0				0	0		AB	0.3	0.3	0.3		62.963	0.260668	0.173394	-0.0237598				1381	0.00236715	0.269177
AMP	AAB	0.7	1.4	0.7				0	0				0	0		AB	0.3	0.3	0.3		62.963	0.260668	0.597415	-0.0836901				1382	0.54594	0.14244
AMP	AAB	0.7	1.4	0.7				0	0				0	0		AB	0.3	0.3	0.3		62.963	0.260668	0.763803	0.0181898				1383	1	-0.124006
AMP	AAB	0.7	1.4	0.7				0	0				0	0		AB	0.3	0.3	0.3		62.963	0.260668	0.377621	0.0719808				1384	0.29839	0.209488
AMP	AAB	0.7	1.4	0.7				0	0				0	0		AB	0.3	0.3	0.3		62.963	0.260668	0.618148	-0.00251508				1385	0.627115	0.0265373
AMP	AAB	0.7	1.4	0.7				0	0				0	0		AB	0.3	0.3	0.3		62.963	0.260668	0.773451	-0.00189842				1386	1	0.267025
AMP	AAB	0.7	1.4	0.7				0	0				0	0		AB	0.3	0.3	0.3		62.963	0.260668	0.343026	0.0274106				1387	0.34296	0.257085
AMP	AAB	0.7	1.4	0.7				0	0				0	0		AB	0.3	0.3	0.3		62.963	0.260668	0.703574	-0.0268434				1388	0.996143	0.300746
AMP	AAB	0.7	1.4	0.7				0	0				0	0		AB	0.3	0.3	0.3		62.963	0.260668	0.936114	-0.0164034				1389	1	0.39505
AMP	AAB	0.7	1.4	0.7				0	0				0	0		AB	0.3	0.3	0.3		62.963	0.260668	0.658404	-0.0153066				1390	0.614323	0.315607
AMP	AAB	0.7	1.4	0.7				0	0				0	0		AB	0.3	0.3	0.3		62.963	0.260668	0.551406	-0.0691557				1391	0.560474	0.285188
AMP	AAB	0.7	1.4	0.7				0	0				0	0		AB	0.3	0.3	0.3		62.963	0.260668	0.67107	-0.00128079				1392	0.628349	0.177169
AMP	AAB	0.7	1.4	0.7				0	0				0	0		AB	0.3	0.3	0.3		62.963	0.260668	0.458479	-0.0015617				1393	0.371932	0.26123
AMP	AAB	0.7	1.4	0.7				0	0				0	0		AB	0.3	0.3	0.3		62.963	0.260668	0.830343	-0.0516845				1394	1	0.265927
AMP	AAB	0.7	1.4	0.7				0	0				0	0		AB	0.3	0.3	0.3		62.963	0.260668	0.356972	0.0386438				1395	0.331727	0.119356
AMP	AAB	0.7	1.4	0.7				0	0				0	0		AB	0.3	0.3	0.3		62.963	0.260668	0.552627	0.0114547				1396	0.641084	0.168432
AMP	AAB	0.7	1.4	0.7				0	0				0	0		AB	0.3	0.3	0.3		62.963	0.260668	0.801189	-0.00842977				1397	0.998165	0.215398
AMP	AAB	0.7	1.4	0.7				0	0				0	0		AB	0.3	0.3	0.3		62.963	0.260668	0.275941	0.00945369				1398	0.00232612	0.285121
AMP	AAB	0.7	1.4	0.7				0	0				0	0		AB	0.3	0.3	0.3		62.963	0.260668	0.637435	0.0558816				1399	0.685511	0.292343
AMP	AAB	0.7	1.4	0.7				0	0				0	0		AB	0.3	0.3	0.3		62.963	0.260668	0.936808	-0.00128642				1400	0.98953	0.481485
AMP	AAB	0.7	1.4	0.7				0	0				0	0		AB	0.3	0.3	0.3		62.963	0.260668	0.548343	0.00263862				1401	0.632268	0.264097
AMP	AAB	0.7	1.4	0.7				0	0				0	0		AB	0.3	0.3	0.3		62.963	0.260668	0.389161	0.0247229				1402	0.345647	0.25313
AMP	AAB	0.7	1.4	0.7				0	0				0	0		AB	0.3	0.3	0.3		62.963	0.260668	0.464282	-0.0114972				1403	0.381868	0.208904
AMP	AAB	0.7	1.4	0.7				0	0				0	0		AB	0.3	0.3	0.3		62.963	0.260668	0.477681	-0.0284143				1404	0.398785	0.267756
AMP	AAB	0.7	1.4	0.7				0	0				0	0		AB	0.3	0.3	0.3		62.963	0.260668	0.501629	-0.00188545				1405	0.627744	0.291372
AMP	AAB	0.7	1.4	0.7				0	0				0	0		AB	0.3	0.3	0.3		62.963	0.260668	0.948805	-0.0167176				1406	1	0.264071
AMP	AAB	0.7	1.4	0.7				0	0				0	0		AB	0.3	0.3	0.3		62.963	0.260668	0.158198	0.0381856				1407	0.0026447	0.318221
AMP	AAB	0.7	1.4	0.7				0	0				0	0		AB	0.3	0.3	0.3		62.963	0.260668	0.56529	0.000940979				1408	0.630571	0.170308
AMP	AAB	0.7	1.4	0.7				0	0				0	0		AB	0.3	0.3	0.3		62.963	0.260668	0.677629	0.042162				1409	0.671792	0.263006
AMP	AAB	0.7	1.4	0.7				0	0				0	0		AB	0.3	0.3	0.3		62.963	0.260668	0.654489	0.0039623				1410	0.633592	0.222614
AMP	AAB	0.7	1.4	0.7				0	0				0	0		AB	0.3	0.3	0.3		62.963	0.260668	0.365682	0.0284931				1411	0.341877	0.264799
AMP	AAB	0.7	1.4	0.7				0	0				0	0		AB	0.3	0.3	0.3		62.963	0.260668	0.549298	0.0208305				1412	0.65046	0.138886
AMP	AAB	0.7	1.4	0.7				0	0				0	0		AB	0.3	0.3	0.3		62.963	0.260668	0.318226	0.000635494				1413	0.369735	0.349572
AMP	AAB	0.7	1.4	0.7				0	0				0	0		AB	0.3	0.3	0.3		62.963	0.260668	0.391069	0.00856804				1414	0.361802	0.259544
AMP	AAB	0.7	1.4	0.7				0	0				0	0		AB	0.3	0.3	0.3		62.963	0.260668	0.147171	-0.0144029				1415	0.00126096	0.231256
AMP	AAB	0.7	1.4	0.7				0	0				0	0		AB	0.3	0.3	0.3		62.963	0.260668	0.84506	-0.0435054				1416	1	0.256398
AMP	AAB	0.7	1.4	0.7				0	0				0	0		AB	0.3	0.3	0.3		62.963	0.260668	0.0957689	-0.0544709				1417	0.00416647	0.333089
AMP	AAB	0.7	1.4	0.7				0	0				0	0		AB	0.3	0.3	0.3		62.963	0.260668	0.56334	-0.0256188				1418	0.604011	0.0873209
AMP	AAB	0.7	1.4	0.7				0	0				0	0		AB	0.3	0.3	0.3		62.963	0.260668	0.0603593	-0.0712727				1419	0.00154633	0.304356
AMP	AAB	0.7	1.4	0.7				0	0				0	0		AB	0.3	0.3	0.3		62.963	0.260668	0.018074	0.016784				1420	0.00128818	0.391773
AMP	AAB	0.7	1.4	0.7				0	0				0	0		AB	0.3	0.3	0.3		62.963	0.260668	0.880257	-0.00954808				1421	0.997045	0.26354
AMP	AAB	0.7	1.4	0.7				0	0				0	0		AB	0.3	0.3	0.3		62.963	0.260668	0.472749	0.00434795				1422	0.366022	0.28697
AMP	AAB	0.7	1.4	0.7				0	0				0	0		AB	0.3	0.3	0.3		62.963	0.260668	0.700727	-0.00176988				1423	0.999391	0.261957
AMP	AAB	0.7	1.4	0.7				0	0				0	0		AB	0.3	0.3	0.3		62.963	0.260668	0.0250303	-0.036458				1424	4.43006e-05	0.265749
AMP	AAB	0.7	1.4	0.7				0	0				0	0		AB	0.3	0.3	0.3		62.963	0.260668	0.0290301	-0.00611211				1425	0.00105838	0.288874
AMP	AAB	0.7	1.4	0.7				0	0				0	0		AB	0.3	0.3	0.3		62.963	0.260668	0.536541	0.0421849				1426	0.671815	0.24314
AMP	AAB	0.7	1.4	0.7				0	0				0	0		AB	0.3	0.3	0.3		62.963	0.260668	0.481499	-0.00232599				1427	0.372696	0.185327
AMP	AAB	0.7	1.4	0.7				0	0				0	0		AB	0.3	0.3	0.3		62.963	0.260668	0.719791	-0.0686283				1428	1	0.26954
AMP	AAB	0.7	1.4	0.7				0	0				0	0		AB	0.3	0.3	0.3		62.963	0.260668	0.600332	-0.000682361				1429	0.628947	0.587551
AMP	AAB	0.7	1.4	0.7				0	0				0	0		AB	0.3	0.3	0.3		62.963	0.260668	0.827462	0.0406681				1430	1	0.2617
AMP	AAB	0.7	1.4	0.7				0	0				0	0		AB	0.3	0.3	0.3		62.963	0.260668	0.857698	0.00561827				1431	0.993024	0.220681
AMP	AAB	0.7	1.4	0.7				0	0				0	0		AB	0.3	0.3	0.3		62.963	0.260668	0.277511	0.000347007				1432	0.00155913	0.236287
AMP	AAB	0.7	1.4	0.7				0	0				0	0		AB	0.3	0.3	0.3		62.963	0.260668	0.958545	0.0079045				1433	0.999933	0.26168
AMP	AAB	0.7	1.4	0.7				0	0				0	0		AB	0.3	0.3	0.3		62.963	0.260668	0.655832	0.0400067				1434	0.669636	0.272449
AMP	AAB	0.7	1.4	0.7				0	0				0	0		AB	0.3	0.3	0.3		62.963	0.260668	0.969674	-0.0296495				1435	0.992241	0.244948
AMP	AAB	0.7	1.4	0.7				0	0				0	0		AB	0.3	0.3	0.3		62.963	0.260668	0.811361	-0.0366366				1436	1	0.164819
AMP	AAB	0.7	1.4	0.7				0	0				0	0		AB	0.3	0.3	0.3		62.963	0.260668	0.258929	0.00911618				1437	0.00948629	0.265915
AMP	AAB	0.7	1.4	0.7				0	0				0	0		AB	0.3	0.3	0.3		62.963	0.260668	0.547158	0.0495994				1438	0.679229	0.251648
AMP	AAB	0.7	1.4	0.7				0	0				0	0		AB	0.3	0.3	0.3		62.963	0.260668	0.82089	0.00837499				1439	0.991857	0.236764
AMP	AAB	0.7	1.4	0.7				0	0				0	0		AB	0.3	0.3	0.3		62.963	0.260668	0.273624	-0.0316551				1440	0.0022916	0.257107
AMP	AAB	0.7	1.4	0.7				0	0				0	0		AB	0.3	0.3	0.3		62.963	0.260668	0.390764	0.0126166				1441	0.357754	0.19541
AMP	AAB	0.7	1.4	0.7				0	0				0	0		AB	0.3	0.3	0.3		62.963	0.260668	0.491374	-0.0702339				1442	0.440604	0.287321
AMP	AAB	0.7	1.4	0.7				0	0				0	0		AB	0.3	0.3	0.3		62.963	0.260668	0.344927	-0.0231974				1443	0.393568	0.370832
AMP	AAB	0.7	1.4	0.7				0	0				0	0		AB	0.3	0.3	0.3		62.963	0.260668	0.326636	-0.0239884				1444	0.394359	0.275886
AMP	AAB	0.7	1.4	0.7				0	0				0	0		AB	0.3	0.3	0.3		62.963	0.260668	0.651237	0.0171191				1445	0.646749	0.328153
AMP	AAB	0.7	1.4	0.7				0	0				0	0		AB	0.3	0.3	0.3		62.963	0.260668	0.854314	-0.00976596				1446	0.997075	0.341126
AMP	AAB	0.7	1.4	0.7				0	0				0	0		AB	0.3	0.3	0.3		62.963	0.260668	0.371813	-0.0159279				1447	0.386298	0.277749
AMP	AAB	0.7	1.4	0.7				0	0				0	0		AB	0.3	0.3	0.3		62.963	0.260668	0.158738	-0.0232684				1448	0.00252836	0.267105
AMP	AAB	0.7	1.4	0.7				0	0				0	0		AB	0.3	0.3	0.3		62.963	0.260668	0.493546	0.0313872				1449	0.338983	0.259126
AMP	AAB	0.7	1.4	0.7				0	0				0	0		AB	0.3	0.3	0.3		62.963	0.260668	0.913944	-0.00770554				1450	0.994263	0.402108
AMP	AAB	0.7	1.4	0.7				0	0				0	0		AB	0.3	0.3	0.3		62.963	0.260668	0.414739	0.0490636				1451	0.321307	0.233073
AMP	AAB	0.7	1.4	0.7				0	0				0	0		AB	0.3	0.3	0.3		62.963	0.260668	0.361027	0.0305139				1452	0.339856	0.444063
AMP	AAB	0.7	1.4	0.7				0	0				0	0		AB	0.3	0.3	0.3		62.963	0.260668	0.65185	-0.00911004				1453	0.62052	0.185453
AMP	AAB	0.7	1.4	0.7				0	0				0	0		AB	0.3	0.3	0.3		62.963	0.260668	0.911324	0.0142476				1454	1	0.264216
AMP	AAB	0.7	1.4	0.7				0	0				0	0		AB	0.3	0.3	0.3		62.963	0.260668	0.5754	0.0673501				1455	0.69698	0.256722
AMP	AAB	0.7	1.4	0.7				0	0				0	0		AB	0.3	0.3	0.3		62.963	0.260668	0.591297	0.0196084				1456	0.649238	0.585539
AMP	AAB	0.7	1.4	0.7				0	0				0	0		AB	0.3	0.3	0.3		62.963	0.260668	0.140759	-0.0296573				1457	0.00276005	0.27587
AMP	AAB	0.7	1.4	0.7				0	0				0	0		AB	0.3	0.3	0.3		62.963	0.260668	0.915503	-0.028352				1458	1	0.354466
AMP	AAB	0.7	1.4	0.7				0	0				0	0		AB	0.3	0.3	0.3		62.963	0.260668	0.162386	0.0149231				1459	0.00460397	0.402544
AMP	AAB	0.7	1.4	0.7				0	0				0	0		AB	0.3	0.3	0.3		62.963	0.260668	0.382738	0.0559121				1460	0.314458	0.251609
AMP	AAB	0.7	1.4	0.7				0	0				0	0		AB	0.3	0.3	0.3		62.963	0.260668	0.919279	-0.000678784				1461	0.98972	0.385387
AMP	AAB	0.7	1.4	0.7				0	0				0	0		AB	0.3	0.3	0.3		62.963	0.260668	0.253253	0.0132418				1462	0.000171904	0.259542
AMP	AAB	0.7	1.4	0.7				0	0				0	0		AB	0.3	0.3	0.3		62.963	0.260668	0.824386	0.0158014				1463	0.997817	0.235214
AMP	AAB	0.7	1.4	0.7				0	0				0	0		AB	0.3	0.3	0.3		62.963	0.260668	0.41692	-0.0191964				1464	0.389567	0.337182
AMP	AAB	0.7	1.4	0.7				0	0				0	0		AB	0.3	0.3	0.3		62.963	0.260668	0.620035	-0.000385156				1465	0.629244	0.23588
AMP	AAB	0.7	1.4	0.7				0	0				0	0		AB	0.3	0.3	0.3		62.963	0.260668	0.755263	-0.00591893				1466	1	0.259596
AMP	AAB	0.7	1.4	0.7				0	0				0	0		AB	0.3	0.3	0.3		62.963	0.260668	0.153897	0.0215562				1467	0.000910905	0.246956
AMP	AAB	0.7	1.4	0.7				0	0				0	0		AB	0.3	0.3	0.3		62.963	0.260668	0.885262	-0.0522547				1468	0.996183	0.318733
AMP	AAB	0.7	1.4	0.7				0	0				0	0		AB	0.3	0.3	0.3		62.963	0.260668	0.237679	-0.014555				1469	0.0124198	0.00375642
AMP	AAB	0.7	1.4	0.7				0	0				0	0		AB	0.3	0.3	0.3		62.963	0.260668	0.730619	-0.0128602				1470	1	0.232368
AMP	AAB	0.7	1.4	0.7				0	0				0	0		AB	0.3	0.3	0.3		62.963	0.260668	0.874788	-0.000460023				1471	1	0.292826
AMP	AAB	0.7	1.4	0.7				0	0				0	0		AB	0.3	0.3	0.3		62.963	0.260668	0.671539	-0.00485622				1472	0.624773	0.261223
AMP	AAB	0.7	1.4	0.7				0	0				0	0		AB	0.3	0.3	0.3		62.963	0.260668	0.238225	0.0585749				1473	0.00115687	0.280623
AMP	AAB	0.7	1.4	0.7				0	0				0	0		AB	0.3	0.3	0.3		62.963	0.260668	0.76768	-0.0435199				1474	0.991007	0.231318
AMP	AAB	0.7	1.4	0.7				0	0				0	0		AB	0.3	0.3	0.3		62.963	0.260668	0.702083	0.0367209				1475	1	0.188927
AMP	AAB	0.7	1.4	0.7				0	0				0	0		AB	0.3	0.3	0.3		62.963	0.260668	0.961785	-0.00915617				1476	0.992936	0.260515
AMP	AAB	0.7	1.4	0.7				0	0				0	0		AB	0.3	0.3	0.3		62.963	0.260668	0.236587	0.0504924				1477	0.00216624	0.228202
AMP	AAB	0.7	1.4	0.7				0	0				0	0		AB	0.3	0.3	0.3		62.963	0.260668	0.940578	0.0528028				1478	0.990502	0.253822
AMP	AAB	0.7	1.4	0.7				0	0				0	0		AB	0.3	0.3	0.3		62.963	0.260668	0.981989	0.0398846				1479	0.98963	0.0928459
AMP	AAB	0.7	1.4	0.7				0	0				0	0		AB	0.3	0.3	0.3		62.963	0.260668	0.779097	0.00533452				1480	0.993785	0.393831
AMP	AAB	0.7	1.4	0.7				0	0				0	0		AB	0.3	0.3	0.3		62.963	0.260668	0.401456	-0.014615				1481	0.384985	0.265756
AMP	AAB	0.7	1.4	0.7				0	0				0	0		AB	0.3	0.3	0.3		62.963	0.260668	0.123141	-0.00404524				1482	0.00179971	0.252732
AMP	AAB	0.7	1.4	0.7				0	0				0	0		AB	0.3	0.3	0.3		62.963	0.260668	0.684552	0.0679419				1483	0.697572	0.271186
AMP	AAB	0.7	1.4	0.7				0	0				0	0		AB	0.3	0.3	0.3		62.963	0.260668	0.625369	-0.0175202				1484	0.612109	0.0662697
AMP	AAB	0.7	1.4	0.7				0	0				0	0		AB	0.3	0.3	0.3		62.963	0.260668	0.992387	-0.017277				1485	1	0.278888
AMP	AAB	0.7	1.4	0.7				0	0				0	0		AB	0.3	0.3	0.3		62.963	0.260668	0.941446	0.0132974				1486	1	0.235945
AMP	AAB	0.7	1.4	0.7				0	0				0	0		AB	0.3	0.3	0.3		62.963	0.260668	0.0180084	0.0825717				1487	0.000239466	0.269112
AMP	AAB	0.7	1.4	0.7				0	0				0	0		AB	0.3	0.3	0.3		62.963	0.260668	0.349634	0.0474891				1488	0.322881	0.651809
AMP	AAB	0.7	1.4	0.7				0	0				0	0		AB	0.3	0.3	0.3		62.963	0.260668	0.376609	0.0540334				1489	0.316337	0.107255
AMP	AAB	0.7	1.4	0.7				0	0				0	0		AB	0.3	0.3	0.3		62.963	0.260668	0.249801	0.0489392				1490	0.0134976	0.0706732
AMP	AAB	0.7	1.4	0.7				0	0				0	0		AB	0.3	0.3	0.3		62.963	0.260668	0.789648	0.00776375				1491	0.992271	0.289507
AMP	AAB	0.7	1.4	0.7				0	0				0	0		AB	0.3	0.3	0.3		62.963	0.260668	0.345912	0.0617541				1492	0.308616	0.286068
AMP	AAB	0.7	1.4	0.7				0	0				0	0		AB	0.3	0.3	0.3		62.963	0.260668	0.229192	0.00460901				1493	0.0141535	0.082332
AMP	AAB	0.7	1.4	0.7				0	0				0	0		AB	0.3	0.3	0.3		62.963	0.260668	0.675371	0.0840949				1494	0.713725	0.268999
AMP	AAB	0.7	1.4	0.7				0	0				0	0		AB	0.3	0.3	0.3		62.963	0.260668	0.399094	-0.0312811				1495	0.401651	0.075732
AMP	AAB	0.7	1.4	0.7				0	0				0	0		AB	0.3	0.3	0.3		62.963	0.260668	0.942853	0.0653412				1496	1	0.182611
AMP	AAB	0.7	1.4	0.7				0	0				0	0		AB	0.3	0.3	0.3		62.963	0.260668	0.227489	-0.0240723				1497	0.0148644	0.28162
AMP	AAB	0.7	1.4	0.7				0	0				0	0		AB	0.3	0.3	0.3		62.963	0.260668	0.176003	0.0410615				1498	0.00423679	0.282368
AMP	AAB	0.6	1.2	0.6				0	0				0	0		AB	0.4	0.4	0.4		61.5385	0.227887	0.587636	0.0130437				1499	0.628428	0.362657
AMP	AAB	0.6	1.2	0.6				0	0				0	0		AB	0.4	0.4	0.4		61.5385	0.227887	0.920623	-0.0058214				1500	0.997598	0.188112
AMP	AAB	0.6	1.2	0.6				0	0				0	0		AB	0.4	0.4	0.4		61.5385	0.227887	0.610576	0.0257077				1501	0.641092	0.221769
AMP	AAB	0.6	1.2	0.6				0	0				0	0		AB	0.4	0.4	0.4		61.5385	0.227887	0.8054	0.0801894				1502	0.995859	0.120251
AMP	AAB	0.6	1.2	0.6				0	0				0	0		AB	0.4	0.4	0.4		61.5385	0.227887	0.501881	0.0204917				1503	0.635876	-0.12147
AMP	AAB	0.6	1.2	0.6				0	0				0	0		AB	0.4	0.4	0.4		61.5385	0.227887	0.664933	-0.0114216				1504	0.603963	0.265985
AMP	AAB	0.6	1.2	0.6				0	0				0	0		AB	0.4	0.4	0.4		61.5385	0.227887	0.273078	0.00732212				1505	0.00311899	0.255783
AMP	AAB	0.6	1.2	0.6				0	0				0	0		AB	0.4	0.4	0.4		61.5385	0.227887	0.979738	0.00704867				1506	0.998565	0.232754
AMP	AAB	0.6	1.2	0.6				0	0				0	0		AB	0.4	0.4	0.4		61.5385	0.227887	0.229461	0.014854				1507	0.0016174	0.202813
AMP	AAB	0.6	1.2	0.6				0	0				0	0		AB	0.4	0.4	0.4		61.5385	0.227887	0.649455	0.0107432				1508	0.626128	0.194446
AMP	AAB	0.6	1.2	0.6				0	0				0	0		AB	0.4	0.4	0.4		61.5385	0.227887	0.80178	-0.0163567				1509	0.998277	0.278944
AMP	AAB	0.6	1.2	0.6				0	0				0	0		AB	0.4	0.4	0.4		61.5385	0.227887	0.791878	-0.00257134				1510	1	0.197615
AMP	AAB	0.6	1.2	0.6				0	0				0	0		AB	0.4	0.4	0.4		61.5385	0.227887	0.569713	0.00147148				1511	0.616856	0.218406
AMP	AAB	0.6	1.2	0.6				0	0				0	0		AB	0.4	0.4	0.4		61.5385	0.227887	0.667036	0.017433				1512	0.632818	0.227797
AMP	AAB	0.6	1.2	0.6				0	0				0	0		AB	0.4	0.4	0.4		61.5385	0.227887	0.055152	0.00521792				1513	0.000961463	0.251033
AMP	AAB	0.6	1.2	0.6				0	0				0	0		AB	0.4	0.4	0.4		61.5385	0.227887	0.58031	-0.000206522				1514	0.615178	0.231546
AMP	AAB	0.6	1.2	0.6				0	0				0	0		AB	0.4	0.4	0.4		61.5385	0.227887	0.159586	0.00598029				1515	3.2958e-05	0.228009
AMP	AAB	0.6	1.2	0.6				0	0				0	0		AB	0.4	0.4	0.4		61.5385	0.227887	0.60024	0.0192041				1516	0.634589	0.256168
AMP	AAB	0.6	1.2	0.6				0	0				0	0		AB	0.4	0.4	0.4		61.5385	0.227887	0.920413	-0.0158717				1517	0.996465	0.180118
AMP	AAB	0.6	1.2	0.6				0	0				0	0		AB	0.4	0.4	0.4		61.5385	0.227887	0.237963	-0.0373765				1518	0.00377688	0.270157
AMP	AAB	0.6	1.2	0.6				0	0				0	0		AB	0.4	0.4	0.4		61.5385	0.227887	0.162242	0.00642087				1519	0.00606405	0.38629
AMP	AAB	0.6	1.2	0.6				0	0				0	0		AB	0.4	0.4	0.4		61.5385	0.227887	0.748138	-7.60152e-05				1520	0.999039	0.236232
AMP	AAB	0.6	1.2	0.6				0	0				0	0		AB	0.4	0.4	0.4		61.5385	0.227887	0.893021	-0.0162456				1521	1	0.228075
AMP	AAB	0.6	1.2	0.6				0	0				0	0		AB	0.4	0.4	0.4		61.5385	0.227887	0.468748	0.0134158				1522	0.3712	0.282507
AMP	AAB	0.6	1.2	0.6				0	0				0	0		AB	0.4	0.4	0.4		61.5385	0.227887	0.987103	-0.013489				1523	0.997351	0.276941
AMP	AAB	0.6	1.2	0.6				0	0				0	0		AB	0.4	0.4	0.4		61.5385	0.227887	0.95915	0.0763516				1524	1	0.208099
AMP	AAB	0.6	1.2	0.6				0	0				0	0		AB	0.4	0.4	0.4		61.5385	0.227887	0.245878	0.0187951				1525	0.0187732	-0.0218307
AMP	AAB	0.6	1.2	0.6				0	0				0	0		AB	0.4	0.4	0.4		61.5385	0.227887	0.0269565	-0.00843014				1526	0.00050665	0.219052
AMP	AAB	0.6	1.2	0.6				0	0				0	0		AB	0.4	0.4	0.4		61.5385	0.227887	0.00619903	-0.0123211				1527	5.22587e-05	0.268017
AMP	AAB	0.6	1.2	0.6				0	0				0	0		AB	0.4	0.4	0.4		61.5385	0.227887	0.533114	-0.00800999				1528	0.607375	0.181146
AMP	AAB	0.6	1.2	0.6				0	0				0	0		AB	0.4	0.4	0.4		61.5385	0.227887	0.503427	-0.00489734				1529	0.610487	0.265145
AMP	AAB	0.6	1.2	0.6				0	0				0	0		AB	0.4	0.4	0.4		61.5385	0.227887	0.149309	-0.0196799				1530	0.000731219	0.250741
AMP	AAB	0.6	1.2	0.6				0	0				0	0		AB	0.4	0.4	0.4		61.5385	0.227887	0.522303	-0.00290715				1531	0.612477	0.25817
AMP	AAB	0.6	1.2	0.6				0	0				0	0		AB	0.4	0.4	0.4		61.5385	0.227887	0.423277	0.0127205				1532	0.371895	0.241639
AMP	AAB	0.6	1.2	0.6				0	0				0	0		AB	0.4	0.4	0.4		61.5385	0.227887	0.782005	-0.0268045				1533	0.99801	0.205847
AMP	AAB	0.6	1.2	0.6				0	0				0	0		AB	0.4	0.4	0.4		61.5385	0.227887	0.935506	0.0207775				1534	1	0.34608
AMP	AAB	0.6	1.2	0.6				0	0				0	0		AB	0.4	0.4	0.4		61.5385	0.227887	0.446441	-0.000842583				1535	0.385458	0.317133
AMP	AAB	0.6	1.2	0.6				0	0				0	0		AB	0.4	0.4	0.4		61.5385	0.227887	0.588777	-0.0486162				1536	0.566768	0.231391
AMP	AAB	0.6	1.2	0.6				0	0				0	0		AB	0.4	0.4	0.4		61.5385	0.227887	0.159245	-0.0183575				1537	0.00774187	0.0891511
AMP	AAB	0.6	1.2	0.6				0	0				0	0		AB	0.4	0.4	0.4		61.5385	0.227887	0.853745	0.0106295				1538	1	0.250554
AMP	AAB	0.6	1.2	0.6				0	0				0	0		AB	0.4	0.4	0.4		61.5385	0.227887	0.459562	0.0539074				1539	0.330708	0.235777
AMP	AAB	0.6	1.2	0.6				0	0				0	0		AB	0.4	0.4	0.4		61.5385	0.227887	0.764543	-0.0103948				1540	0.991757	0.392123
AMP	AAB	0.6	1.2	0.6				0	0				0	0		AB	0.4	0.4	0.4		61.5385	0.227887	0.173369	-0.0426255				1541	0.00180214	0.257648
AMP	AAB	0.6	1.2	0.6				0	0				0	0		AB	0.4	0.4	0.4		61.5385	0.227887	0.441674	0.049203				1542	0.335412	0.185974
AMP	AAB	0.6	1.2	0.6				0	0				0	0		AB	0.4	0.4	0.4		61.5385	0.227887	0.554996	0.0315138				1543	0.646898	0.0662854
AMP	AAB	0.6	1.2	0.6				0	0				0	0		AB	0.4	0.4	0.4		61.5385	0.227887	0.866987	-1.38668e-05				1544	0.994536	0.235381
AMP	AAB	0.6	1.2	0.6				0	0				0	0		AB	0.4	0.4	0.4		61.5385	0.227887	0.826451	0.0140099				1545	1	0.227843
AMP	AAB	0.6	1.2	0.6				0	0				0	0		AB	0.4	0.4	0.4		61.5385	0.227887	0.456764	0.0128944				1546	0.371721	0.264373
AMP	AAB	0.6	1.2	0.6				0	0				0	0		AB	0.4	0.4	0.4		61.5385	0.227887	0.918376	-0.00316959				1547	0.997632	0.199284
AMP	AAB	0.6	1.2	0.6				0	0				0	0		AB	0.4	0.4	0.4		61.5385	0.227887	0.951745	-0.0118809				1548	1	0.212609
AMP	AAB	0.6	1.2	0.6				0	0				0	0		AB	0.4	0.4	0.4		61.5385	0.227887	0.890852	-0.0112982				1549	1	0.252932
AMP	AAB	0.6	1.2	0.6				0	0				0	0		AB	0.4	0.4	0.4		61.5385	0.227887	0.570635	-0.0781591				1550	0.537226	0.235279
AMP	AAB	0.6	1.2	0.6				0	0				0	0		AB	0.4	0.4	0.4		61.5385	0.227887	0.601529	-0.00569034				1551	0.609694	0.464738
AMP	AAB	0.6	1.2	0.6				0	0				0	0		AB	0.4	0.4	0.4		61.5385	0.227887	0.998209	0.0128778				1552	1	0.235186
AMP	AAB	0.6	1.2	0.6				0	0				0	0		AB	0.4	0.4	0.4		61.5385	0.227887	0.57754	0.0398778				1553	0.655262	0.205463
AMP	AAB	0.6	1.2	0.6				0	0				0	0		AB	0.4	0.4	0.4		61.5385	0.227887	0.725123	0.0258679				1554	0.994217	0.243017
AMP	AAB	0.6	1.2	0.6				0	0				0	0		AB	0.4	0.4	0.4		61.5385	0.227887	0.275646	0.0306088				1555	0.00713039	0.297429
AMP	AAB	0.6	1.2	0.6				0	0				0	0		AB	0.4	0.4	0.4		61.5385	0.227887	0.45977	-0.00404858				1556	0.388664	0.289722
AMP	AAB	0.6	1.2	0.6				0	0				0	0		AB	0.4	0.4	0.4		61.5385	0.227887	0.00610291	0.0584264				1557	2.47081e-05	0.208064
AMP	AAB	0.6	1.2	0.6				0	0				0	0		AB	0.4	0.4	0.4		61.5385	0.227887	0.413462	-0.0308777				1558	0.415493	0.000490803
AMP	AAB	0.6	1.2	0.6				0	0				0	0		AB	0.4	0.4	0.4		61.5385	0.227887	0.738309	0.0755794				1559	1	0.152264
AMP	AAB	0.6	1.2	0.6				0	0				0	0		AB	0.4	0.4	0.4		61.5385	0.227887	0.476889	0.0905954				1560	0.29402	0.238927
AMP	AAB	0.6	1.2	0.6				0	0				0	0		AB	0.4	0.4	0.4		61.5385	0.227887	0.415629	-0.000782563				1561	0.385398	-0.00445122
AMP	AAB	0.6	1.2	0.6				0	0				0	0		AB	0.4	0.4	0.4		61.5385	0.227887	0.178872	0.0102484				1562	0.000139979	0.22989
AMP	AAB	0.6	1.2	0.6				0	0				0	0		AB	0.4	0.4	0.4		61.5385	0.227887	0.457853	0.0510539				1563	0.333562	0.241247
AMP	AAB	0.6	1.2	0.6				0	0				0	0		AB	0.4	0.4	0.4		61.5385	0.227887	0.577947	0.0485171				1564	0.663902	0.361209
AMP	AAB	0.6	1.2	0.6				0	0				0	0		AB	0.4	0.4	0.4		61.5385	0.227887	0.507633	-0.0118034				1565	0.603581	0.382349
AMP	AAB	0.6	1.2	0.6				0	0				0	0		AB	0.4	0.4	0.4		61.5385	0.227887	0.11971	-0.0370729				1566	0.00141299	0.169303
AMP	AAB	0.6	1.2	0.6				0	0				0	0		AB	0.4	0.4	0.4		61.5385	0.227887	0.433787	-0.0176079				1567	0.402223	0.254307
AMP	AAB	0.6	1.2	0.6				0	0				0	0		AB	0.4	0.4	0.4		61.5385	0.227887	0.807287	0.0927391				1568	1	0.276595
AMP	AAB	0.6	1.2	0.6				0	0				0	0		AB	0.4	0.4	0.4		61.5385	0.227887	0.283429	-0.00868462				1569	0.0262849	0.209435
AMP	AAB	0.6	1.2	0.6				0	0				0	0		AB	0.4	0.4	0.4		61.5385	0.227887	0.641394	-0.0475232				1570	0.567861	0.223374
AMP	AAB	0.6	1.2	0.6				0	0				0	0		AB	0.4	0.4	0.4		61.5385	0.227887	0.879831	-0.0497117				1571	1	0.433879
AMP	AAB	0.6	1.2	0.6				0	0				0	0		AB	0.4	0.4	0.4		61.5385	0.227887	0.599537	-4.66447e-05				1572	0.615338	0.275164
AMP	AAB	0.6	1.2	0.6				0	0				0	0		AB	0.4	0.4	0.4		61.5385	0.227887	0.372479	-0.010268				1573	0.394883	0.227959
AMP	AAB	0.6	1.2	0.6				0	0				0	0		AB	0.4	0.4	0.4		61.5385	0.227887	0.767617	-0.026594				1574	1	0.273604
AMP	AAB	0.6	1.2	0.6				0	0				0	0		AB	0.4	0.4	0.4		61.5385	0.227887	0.187989	-0.0325034				1575	0.00499939	0.197153
AMP	AAB	0.6	1.2	0.6				0	0				0	0		AB	0.4	0.4	0.4		61.5385	0.227887	0.446918	-0.0265357				1576	0.411151	0.12065
AMP	AAB	0.6	1.2	0.6				0	0				0	0		AB	0.4	0.4	0.4		61.5385	0.227887	0.107999	-0.0723199				1577	0.00286583	0.300967
AMP	AAB	0.6	1.2	0.6				0	0				0	0		AB	0.4	0.4	0.4		61.5385	0.227887	0.250664	0.0229501				1578	0.018128	0.0564076
AMP	AAB	0.6	1.2	0.6				0	0				0	0		AB	0.4	0.4	0.4		61.5385	0.227887	0.513804	0.0122579				1579	0.627643	0.330021
AMP	AAB	0.6	1.2	0.6				0	0				0	0		AB	0.4	0.4	0.4		61.5385	0.227887	0.911293	0.000372017				1580	0.997766	0.240253
AMP	AAB	0.6	1.2	0.6				0	0				0	0		AB	0.4	0.4	0.4		61.5385	0.227887	0.185506	0.00555981				1581	6.90114e-05	0.227033
AMP	AAB	0.6	1.2	0.6				0	0				0	0		AB	0.4	0.4	0.4		61.5385	0.227887	0.521423	0.0804672				1582	0.695852	0.225903
AMP	AAB	0.6	1.2	0.6				0	0				0	0		AB	0.4	0.4	0.4		61.5385	0.227887	0.925227	-0.0887405				1583	0.98511	0.125836
AMP	AAB	0.6	1.2	0.6				0	0				0	0		AB	0.4	0.4	0.4		61.5385	0.227887	0.193602	0.0151615				1584	0.0171803	-0.0310466
AMP	AAB	0.6	1.2	0.6				0	0				0	0		AB	0.4	0.4	0.4		61.5385	0.227887	0.0693534	0.00128427				1585	0.0010515	0.224952
AMP	AAB	0.6	1.2	0.6				0	0				0	0		AB	0.4	0.4	0.4		61.5385	0.227887	0.142371	0.00201976				1586	0.000182843	0.232224
AMP	AAB	0.6	1.2	0.6				0	0				0	0		AB	0.4	0.4	0.4		61.5385	0.227887	0.896011	-0.000578222				1587	0.999638	0.227507
AMP	AAB	0.6	1.2	0.6				0	0				0	0		AB	0.4	0.4	0.4		61.5385	0.227887	0.240788	0.0190617				1588	0.000139229	0.228691
AMP	AAB	0.6	1.2	0.6				0	0				0	0		AB	0.4	0.4	0.4		61.5385	0.227887	0.165649	0.0143945				1589	0.00315755	0.261615
AMP	AAB	0.6	1.2	0.6				0	0				0	0		AB	0.4	0.4	0.4		61.5385	0.227887	0.14343	-0.00239042				1590	0.00206459	0.202314
AMP	AAB	0.6	1.2	0.6				0	0				0	0		AB	0.4	0.4	0.4		61.5385	0.227887	0.634471	0.00272523				1591	0.61811	0.221162
AMP	AAB	0.6	1.2	0.6				0	0				0	0		AB	0.4	0.4	0.4		61.5385	0.227887	0.327429	0.0458591				1592	0.338756	0.226803
AMP	AAB	0.6	1.2	0.6				0	0				0	0		AB	0.4	0.4	0.4		61.5385	0.227887	0.468818	-0.00617359				1593	0.390789	0.151348
AMP	AAB	0.6	1.2	0.6				0	0				0	0		AB	0.4	0.4	0.4		61.5385	0.227887	0.401595	0.00331329				1594	0.381302	0.236132
AMP	AAB	0.6	1.2	0.6				0	0				0	0		AB	0.4	0.4	0.4		61.5385	0.227887	0.545102	-0.0568745				1595	0.55851	0.220474
AMP	AAB	0.6	1.2	0.6				0	0				0	0		AB	0.4	0.4	0.4		61.5385	0.227887	0.356748	-0.0268496				1596	0.411465	0.326461
AMP	AAB	0.6	1.2	0.6				0	0				0	0		AB	0.4	0.4	0.4		61.5385	0.227887	0.95978	-0.0430714				1597	1	0.240393
AMP	AAB	0.6	1.2	0.6				0	0				0	0		AB	0.4	0.4	0.4		61.5385	0.227887	0.279912	0.022216				1598	0.0120562	0.309313
AMP	AAB	0.6	1.2	0.6				0	0				0	0		AB	0.4	0.4	0.4		61.5385	0.227887	0.951727	0.00445242				1599	0.995771	0.18702
AMP	AAB	0.6	1.2	0.6				0	0				0	0		AB	0.4	0.4	0.4		61.5385	0.227887	0.387087	0.0437518				1600	0.340864	0.242203
AMP	AAB	0.6	1.2	0.6				0	0				0	0		AB	0.4	0.4	0.4		61.5385	0.227887	0.383095	-0.023217				1601	0.407832	0.328933
AMP	AAB	0.6	1.2	0.6				0	0				0	0		AB	0.4	0.4	0.4		61.5385	0.227887	0.168656	-0.000601418				1602	0.00391569	0.144377
AMP	AAB	0.6	1.2	0.6				0	0				0	0		AB	0.4	0.4	0.4		61.5385	0.227887	0.679273	0.00377022				1603	0.619155	0.229249
AMP	AAB	0.6	1.2	0.6				0	0				0	0		AB	0.4	0.4	0.4		61.5385	0.227887	0.226486	-0.0299496				1604	0.000853904	0.244702
AMP	AAB	0.6	1.2	0.6				0	0				0	0		AB	0.4	0.4	0.4		61.5385	0.227887	0.795761	0.0417858				1605	1	0.133958
AMP	AAB	0.6	1.2	0.6				0	0				0	0		AB	0.4	0.4	0.4		61.5385	0.227887	0.00131465	-0.0491025				1606	5.49336e-05	0.130763
AMP	AAB	0.6	1.2	0.6				0	0				0	0		AB	0.4	0.4	0.4		61.5385	0.227887	0.384315	0.0316888				1607	0.352927	0.0249083
AMP	AAB	0.6	1.2	0.6				0	0				0	0		AB	0.4	0.4	0.4		61.5385	0.227887	0.476541	-0.0210886				1608	0.405704	0.193799
AMP	AAB	0.6	1.2	0.6				0	0				0	0		AB	0.4	0.4	0.4		61.5385	0.227887	0.997	-0.00484736				1609	1	0.329723
AMP	AAB	0.6	1.2	0.6				0	0				0	0		AB	0.4	0.4	0.4		61.5385	0.227887	0.944866	0.0321677				1610	1	0.220809
AMP	AAB	0.6	1.2	0.6				0	0				0	0		AB	0.4	0.4	0.4		61.5385	0.227887	0.656187	4.60635e-05				1611	0.615431	0.272307
AMP	AAB	0.6	1.2	0.6				0	0				0	0		AB	0.4	0.4	0.4		61.5385	0.227887	0.983175	0.0378722				1612	0.999991	0.228043
AMP	AAB	0.6	1.2	0.6				0	0				0	0		AB	0.4	0.4	0.4		61.5385	0.227887	0.352026	0.0133858				1613	0.37123	0.0624466
AMP	AAB	0.6	1.2	0.6				0	0				0	0		AB	0.4	0.4	0.4		61.5385	0.227887	0.742802	0.0359579				1614	0.998011	0.239769
AMP	AAB	0.6	1.2	0.6				0	0				0	0		AB	0.4	0.4	0.4		61.5385	0.227887	0.550091	0.00433024				1615	0.619715	0.37387
AMP	AAB	0.6	1.2	0.6				0	0				0	0		AB	0.4	0.4	0.4		61.5385	0.227887	0.440645	-0.0243944				1616	0.40901	0.221851
AMP	AAB	0.6	1.2	0.6				0	0				0	0		AB	0.4	0.4	0.4		61.5385	0.227887	0.140904	-0.00313004				1617	0.00343727	0.137057
AMP	AAB	0.6	1.2	0.6				0	0				0	0		AB	0.4	0.4	0.4		61.5385	0.227887	0.523451	0.047878				1618	0.663263	0.225359
AMP	AAB	0.6	1.2	0.6				0	0				0	0		AB	0.4	0.4	0.4		61.5385	0.227887	0.459239	-0.0132518				1619	0.397867	0.338344
AMP	AAB	0.6	1.2	0.6				0	0				0	0		AB	0.4	0.4	0.4		61.5385	0.227887	0.838708	-0.00221476				1620	1	0.290782
AMP	AAB	0.6	1.2	0.6				0	0				0	0		AB	0.4	0.4	0.4		61.5385	0.227887	0.357871	0.0242445				1621	0.360371	0.22769
AMP	AAB	0.6	1.2	0.6				0	0				0	0		AB	0.4	0.4	0.4		61.5385	0.227887	0.447205	0.03715				1622	0.347465	0.174808
AMP	AAB	0.6	1.2	0.6				0	0				0	0		AB	0.4	0.4	0.4		61.5385	0.227887	0.222528	-0.00448744				1623	0.0082669	0.393361
AMP	AAB	0.6	1.2	0.6				0	0				0	0		AB	0.4	0.4	0.4		61.5385	0.227887	0.276704	0.0350093				1624	0.00124169	0.22761
AMP	AAB	0.6	1.2	0.6				0	0				0	0		AB	0.4	0.4	0.4		61.5385	0.227887	0.169099	0.0499821				1625	0.00592003	0.101737
AMP	AAB	0.6	1.2	0.6				0	0				0	0		AB	0.4	0.4	0.4		61.5385	0.227887	0.287096	-0.0358073				1626	0.0143497	0.114259
AMP	AAB	0.6	1.2	0.6				0	0				0	0		AB	0.4	0.4	0.4		61.5385	0.227887	0.306852	-0.037044				1627	0.421659	0.208797
AMP	AAB	0.6	1.2	0.6				0	0				0	0		AB	0.4	0.4	0.4		61.5385	0.227887	0.476907	0.00297541				1628	0.38164	0.194679
AMP	AAB	0.6	1.2	0.6				0	0				0	0		AB	0.4	0.4	0.4		61.5385	0.227887	0.666737	-0.0200443				1629	0.59534	0.224892
AMP	AAB	0.6	1.2	0.6				0	0				0	0		AB	0.4	0.4	0.4		61.5385	0.227887	0.475986	-0.00750742				1630	0.392123	0.200595
AMP	AAB	0.6	1.2	0.6				0	0				0	0		AB	0.4	0.4	0.4		61.5385	0.227887	0.277618	0.00704069				1631	0.0020842	0.23569
AMP	AAB	0.6	1.2	0.6				0	0				0	0		AB	0.4	0.4	0.4		61.5385	0.227887	0.445765	-0.0741354				1632	0.458751	0.194992
AMP	AAB	0.6	1.2	0.6				0	0				0	0		AB	0.4	0.4	0.4		61.5385	0.227887	0.149273	0.0636041				1633	0.0110664	0.335767
AMP	AAB	0.6	1.2	0.6				0	0				0	0		AB	0.4	0.4	0.4		61.5385	0.227887	0.530053	0.000571139				1634	0.615956	0.259379
AMP	AAB	0.6	1.2	0.6				0	0				0	0		AB	0.4	0.4	0.4		61.5385	0.227887	0.106801	0.0300035				1635	6.09984e-05	0.230627
AMP	AAB	0.6	1.2	0.6				0	0				0	0		AB	0.4	0.4	0.4		61.5385	0.227887	0.58229	0.00228091				1636	0.617666	0.114639
AMP	AAB	0.6	1.2	0.6				0	0				0	0		AB	0.4	0.4	0.4		61.5385	0.227887	0.85846	0.0696151				1637	0.999608	0.230247
AMP	AAB	0.6	1.2	0.6				0	0				0	0		AB	0.4	0.4	0.4		61.5385	0.227887	0.0931033	0.0341744				1638	0.0064814	0.514028
AMP	AAB	0.6	1.2	0.6				0	0				0	0		AB	0.4	0.4	0.4		61.5385	0.227887	0.438876	-0.027337				1639	0.411952	0.140281
AMP	AAB	0.6	1.2	0.6				0	0				0	0		AB	0.4	0.4	0.4		61.5385	0.227887	0.270743	0.0757942				1640	0.0074013	0.302631
AMP	AAB	0.6	1.2	0.6				0	0				0	0		AB	0.4	0.4	0.4		61.5385	0.227887	0.552257	-0.0806057				1641	0.534779	0.365217
AMP	AAB	0.6	1.2	0.6				0	0				0	0		AB	0.4	0.4	0.4		61.5385	0.227887	0.507557	-0.0694776				1642	0.545907	0.337762
AMP	AAB	0.6	1.2	0.6				0	0				0	0		AB	0.4	0.4	0.4		61.5385	0.227887	0.788742	-0.0247183				1643	1	0.400031
AMP	AAB	0.6	1.2	0.6				0	0				0	0		AB	0.4	0.4	0.4		61.5385	0.227887	0.150364	-0.00487138				1644	0.00371673	0.123117
AMP	AAB	0.6	1.2	0.6				0	0				0	0		AB	0.4	0.4	0.4		61.5385	0.227887	0.332339	0.0310648				1645	0.353551	0.23662
AMP	AAB	0.6	1.2	0.6				0	0				0	0		AB	0.4	0.4	0.4		61.5385	0.227887	0.674868	-0.0192208				1646	0.596164	0.157554
AMP	AAB	0.6	1.2	0.6				0	0				0	0		AB	0.4	0.4	0.4		61.5385	0.227887	0.118048	-0.0411747				1647	0.00226899	0.215647
AMP	AAB	0.6	1.2	0.6				0	0				0	0		AB	0.4	0.4	0.4		61.5385	0.227887	0.491812	-0.0328338				1648	0.417449	0.0805528
AMP	AAB	0.6	1.2	0.6				0	0				0	0		AB	0.4	0.4	0.4		61.5385	0.227887	0.364573	0.0563456				1649	0.32827	0.0707884
AMP	AAB	0.6	1.2	0.6				0	0				0	0		AB	0.4	0.4	0.4		61.5385	0.227887	0.476341	0.0324745				1650	0.352141	0.0922789
AMP	AAB	0.6	1.2	0.6				0	0				0	0		AB	0.4	0.4	0.4		61.5385	0.227887	0.41515	0.00290485				1651	0.381711	0.326114
AMP	AAB	0.6	1.2	0.6				0	0				0	0		AB	0.4	0.4	0.4		61.5385	0.227887	0.21709	0.0486951				1652	0.000630612	0.236874
AMP	AAB	0.6	1.2	0.6				0	0				0	0		AB	0.4	0.4	0.4		61.5385	0.227887	0.0812296	0.0131859				1653	0.00395549	0.204196
AMP	AAB	0.6	1.2	0.6				0	0				0	0		AB	0.4	0.4	0.4		61.5385	0.227887	0.744698	0.00769865				1654	0.998036	0.163298
AMP	AAB	0.6	1.2	0.6				0	0				0	0		AB	0.4	0.4	0.4		61.5385	0.227887	0.346426	-0.0204903				1655	0.405106	0.192443
AMP	AAB	0.6	1.2	0.6				0	0				0	0		AB	0.4	0.4	0.4		61.5385	0.227887	0.323561	-0.0384184				1656	0.423034	0.326027
AMP	AAB	0.6	1.2	0.6				0	0				0	0		AB	0.4	0.4	0.4		61.5385	0.227887	0.724327	0.000387839				1657	1	0.340027
AMP	AAB	0.6	1.2	0.6				0	0				0	0		AB	0.4	0.4	0.4		61.5385	0.227887	0.831261	-0.0133895				1658	0.999936	0.227096
AMP	AAB	0.6	1.2	0.6				0	0				0	0		AB	0.4	0.4	0.4		61.5385	0.227887	0.962409	-0.0678714				1659	1	0.24009
AMP	AAB	0.6	1.2	0.6				0	0				0	0		AB	0.4	0.4	0.4		61.5385	0.227887	0.333455	0.0114611				1660	0.373154	0.46776
AMP	AAB	0.6	1.2	0.6				0	0				0	0		AB	0.4	0.4	0.4		61.5385	0.227887	0.55068	0.0835166				1661	0.698901	0.212118
AMP	AAB	0.6	1.2	0.6				0	0				0	0		AB	0.4	0.4	0.4		61.5385	0.227887	0.426911	0.0672816				1662	0.317334	0.490975
AMP	AAB	0.6	1.2	0.6				0	0				0	0		AB	0.4	0.4	0.4		61.5385	0.227887	0.62206	0.00344778				1663	0.618832	0.244365
AMP	AAB	0.6	1.2	0.6				0	0				0	0		AB	0.4	0.4	0.4		61.5385	0.227887	0.700797	-0.0765227				1664	0.999517	0.211559
AMP	AAB	0.6	1.2	0.6				0	0				0	0		AB	0.4	0.4	0.4		61.5385	0.227887	0.70446	0.0449389				1665	1	0.0283423
AMP	AAB	0.6	1.2	0.6				0	0				0	0		AB	0.4	0.4	0.4		61.5385	0.227887	0.958017	-0.059925				1666	0.99139	0.361791
AMP	AAB	0.6	1.2	0.6				0	0				0	0		AB	0.4	0.4	0.4		61.5385	0.227887	0.637017	0.0216451				1667	0.63703	0.0103881
AMP	AAB	0.6	1.2	0.6				0	0				0	0		AB	0.4	0.4	0.4		61.5385	0.227887	0.645884	0.0526261				1668	0.668011	0.194672
AMP	AAB	0.6	1.2	0.6				0	0				0	0		AB	0.4	0.4	0.4		61.5385	0.227887	0.0829432	0.0458893				1669	0.00436498	0.32803
AMP	AAB	0.6	1.2	0.6				0	0				0	0		AB	0.4	0.4	0.4		61.5385	0.227887	0.510479	-0.0154502				1670	0.599934	0.195064
AMP	AAB	0.6	1.2	0.6				0	0				0	0		AB	0.4	0.4	0.4		61.5385	0.227887	0.246237	-0.00165552				1671	0.00380441	0.260962
AMP	AAB	0.6	1.2	0.6				0	0				0	0		AB	0.4	0.4	0.4		61.5385	0.227887	0.917791	0.0101184				1672	1	0.229751
AMP	AAB	0.6	1.2	0.6				0	0				0	0		AB	0.4	0.4	0.4		61.5385	0.227887	0.260677	0.00240225				1673	0.00263762	0.2122
AMP	AAB	0.6	1.2	0.6				0	0				0	0		AB	0.4	0.4	0.4		61.5385	0.227887	0.576032	0.0583474				1674	0.673732	0.221622
AMP	AAB	0.6	1.2	0.6				0	0				0	0		AB	0.4	0.4	0.4		61.5385	0.227887	0.265108	0.000424805				1675	0.0154684	0.115011
AMP	AAB	0.6	1.2	0.6				0	0				0	0		AB	0.4	0.4	0.4		61.5385	0.227887	0.940471	0.0417116				1676	0.99992	0.228142
AMP	AAB	0.6	1.2	0.6				0	0				0	0		AB	0.4	0.4	0.4		61.5385	0.227887	0.316305	-0.000297894				1677	0.384913	0.176633
AMP	AAB	0.6	1.2	0.6				0	0				0	0		AB	0.4	0.4	0.4		61.5385	0.227887	0.186639	0.0305542				1678	5.55987e-05	0.227021
AMP	AAB	0.6	1.2	0.6				0	0				0	0		AB	0.4	0.4	0.4		61.5385	0.227887	0.440944	-0.00537247				1679	0.389988	0.220848
AMP	AAB	0.6	1.2	0.6				0	0				0	0		AB	0.4	0.4	0.4		61.5385	0.227887	0.631345	-0.0283359				1680	0.587049	0.216328
AMP	AAB	0.6	1.2	0.6				0	0				0	0		AB	0.4	0.4	0.4		61.5385	0.227887	0.770103	-0.0403276				1681	1	0.193159
AMP	AAB	0.6	1.2	0.6				0	0				0	0		AB	0.4	0.4	0.4		61.5385	0.227887	0.830703	0.00527755				1682	1	0.254193
AMP	AAB	0.6	1.2	0.6				0	0				0	0		AB	0.4	0.4	0.4		61.5385	0.227887	0.434379	-0.0229592				1683	0.407575	0.226667
AMP	AAB	0.6	1.2	0.6				0	0				0	0		AB	0.4	0.4	0.4		61.5385	0.227887	0.12005	-0.000990877				1684	0.00275625	0.167599
AMP	AAB	0.6	1.2	0.6				0	0				0	0		AB	0.4	0.4	0.4		61.5385	0.227887	0.691106	0.000620478				1685	0.616005	0.231981
AMP	AAB	0.6	1.2	0.6				0	0				0	0		AB	0.4	0.4	0.4		61.5385	0.227887	0.501012	0.0325284				1686	0.647913	0.228926
AMP	AAB	0.6	1.2	0.6				0	0				0	0		AB	0.4	0.4	0.4		61.5385	0.227887	0.743261	0.0412187				1687	0.995165	0.348785
AMP	AAB	0.6	1.2	0.6				0	0				0	0		AB	0.4	0.4	0.4		61.5385	0.227887	0.832578	-0.00907344				1688	0.993136	0.411702
AMP	AAB	0.6	1.2	0.6				0	0				0	0		AB	0.4	0.4	0.4		61.5385	0.227887	0.440446	-0.00919314				1689	0.393809	0.256012
AMP	AAB	0.6	1.2	0.6				0	0				0	0		AB	0.4	0.4	0.4		61.5385	0.227887	0.357546	-0.0116121				1690	0.396227	0.232903
AMP	AAB	0.6	1.2	0.6				0	0				0	0		AB	0.4	0.4	0.4		61.5385	0.227887	0.546722	0.0540771				1691	0.669462	0.228184
AMP	AAB	0.6	1.2	0.6				0	0				0	0		AB	0.4	0.4	0.4		61.5385	0.227887	0.211759	0.0332462				1692	0.0114513	0.357351
AMP	AAB	0.6	1.2	0.6				0	0				0	0		AB	0.4	0.4	0.4		61.5385	0.227887	0.112257	-0.0132107				1693	0.00373212	0.323553
AMP	AAB	0.6	1.2	0.6				0	0				0	0		AB	0.4	0.4	0.4		61.5385	0.227887	0.445639	-0.0106129				1694	0.395228	0.285442
AMP	AAB	0.6	1.2	0.6				0	0				0	0		AB	0.4	0.4	0.4		61.5385	0.227887	0.726717	-0.0159005				1695	1	0.215578
AMP	AAB	0.6	1.2	0.6				0	0				0	0		AB	0.4	0.4	0.4		61.5385	0.227887	0.984671	-0.016356				1696	1	0.209913
AMP	AAB	0.6	1.2	0.6				0	0				0	0		AB	0.4	0.4	0.4		61.5385	0.227887	0.741914	-0.0132597				1697	1	0.241694
AMP	AAB	0.6	1.2	0.6				0	0				0	0		AB	0.4	0.4	0.4		61.5385	0.227887	0.416749	0.0114597				1698	0.373156	0.290921
AMP	AAB	0.6	1.2	0.6				0	0				0	0		AB	0.4	0.4	0.4		61.5385	0.227887	0.416371	0.0132112				1699	0.371404	0.280658
AMP	AAB	0.6	1.2	0.6				0	0				0	0		AB	0.4	0.4	0.4		61.5385	0.227887	0.695709	0.0026356				1700	0.61802	0.259701
AMP	AAB	0.6	1.2	0.6				0	0				0	0		AB	0.4	0.4	0.4		61.5385	0.227887	0.629572	-0.0154987				1701	0.599886	0.224822
AMP	AAB	0.6	1.2	0.6				0	0				0	0		AB	0.4	0.4	0.4		61.5385	0.227887	0.456772	0.000854353				1702	0.383761	0.188385
AMP	AAB	0.6	1.2	0.6				0	0				0	0		AB	0.4	0.4	0.4		61.5385	0.227887	0.512867	-2.25959e-05				1703	0.615362	0.227308
AMP	AAB	0.6	1.2	0.6				0	0				0	0		AB	0.4	0.4	0.4		61.5385	0.227887	0.125543	-0.0556377				1704	2.83675e-06	0.227949
AMP	AAB	0.6	1.2	0.6				0	0				0	0		AB	0.4	0.4	0.4		61.5385	0.227887	0.253196	0.0148269				1705	0.0140872	0.102235
AMP	AAB	0.6	1.2	0.6				0	0				0	0		AB	0.4	0.4	0.4		61.5385	0.227887	0.891317	-0.00217461				1706	0.997357	0.194743
AMP	AAB	0.6	1.2	0.6				0	0				0	0		AB	0.4	0.4	0.4		61.5385	0.227887	0.701101	-0.00240591				1707	1	0.232916
AMP	AAB	0.6	1.2	0.6				0	0				0	0		AB	0.4	0.4	0.4		61.5385	0.227887	0.556509	-0.0490825				1708	0.566302	0.235111
AMP	AAB	0.6	1.2	0.6				0	0				0	0		AB	0.4	0.4	0.4		61.5385	0.227887	0.364818	0.00748903				1709	0.377126	0.379968
AMP	AAB	0.6	1.2	0.6				0	0				0	0		AB	0.4	0.4	0.4		61.5385	0.227887	0.278778	0.00547021				1710	0.00208777	0.213951
AMP	AAB	0.6	1.2	0.6				0	0				0	0		AB	0.4	0.4	0.4		61.5385	0.227887	0.929168	-0.0146022				1711	0.998983	0.21762
AMP	AAB	0.6	1.2	0.6				0	0				0	0		AB	0.4	0.4	0.4		61.5385	0.227887	0.209855	0.0102873				1712	0.00306434	0.20005
AMP	AAB	0.6	1.2	0.6				0	0				0	0		AB	0.4	0.4	0.4		61.5385	0.227887	0.718124	-0.00118149				1713	0.998522	0.275107
AMP	AAB	0.6	1.2	0.6				0	0				0	0		AB	0.4	0.4	0.4		61.5385	0.227887	0.820808	-0.0196282				1714	1	0.223989
AMP	AAB	0.6	1.2	0.6				0	0				0	0		AB	0.4	0.4	0.4		61.5385	0.227887	0.463754	-0.0159096				1715	0.400525	0.259212
AMP	AAB	0.6	1.2	0.6				0	0				0	0		AB	0.4	0.4	0.4		61.5385	0.227887	0.64786	0.00547689				1716	0.620862	0.223926
AMP	AAB	0.6	1.2	0.6				0	0				0	0		AB	0.4	0.4	0.4		61.5385	0.227887	0.185675	-0.00909261				1717	0.00101692	0.234411
AMP	AAB	0.6	1.2	0.6				0	0				0	0		AB	0.4	0.4	0.4		61.5385	0.227887	0.920148	0.0230626				1718	1	0.215691
AMP	AAB	0.6	1.2	0.6				0	0				0	0		AB	0.4	0.4	0.4		61.5385	0.227887	0.773342	-0.0710022				1719	0.996433	0.266843
AMP	AAB	0.6	1.2	0.6				0	0				0	0		AB	0.4	0.4	0.4		61.5385	0.227887	0.0514186	-0.00582425				1720	0.00365083	-0.063436
AMP	AAB	0.6	1.2	0.6				0	0				0	0		AB	0.4	0.4	0.4		61.5385	0.227887	0.430641	-0.0102041				1721	0.39482	0.236361
AMP	AAB	0.6	1.2	0.6				0	0				0	0		AB	0.4	0.4	0.4		61.5385	0.227887	0.0414406	0.0188022				1722	0.000422865	0.219138
AMP	AAB	0.6	1.2	0.6				0	0				0	0		AB	0.4	0.4	0.4		61.5385	0.227887	0.584927	0.0718035				1723	0.687188	0.244655
AMP	AAB	0.6	1.2	0.6				0	0				0	0		AB	0.4	0.4	0.4		61.5385	0.227887	0.679539	-0.00272747				1724	0.612657	0.213201
AMP	AAB	0.6	1.2	0.6				0	0				0	0		AB	0.4	0.4	0.4		61.5385	0.227887	0.967322	0.0309489				1725	1	0.218603
AMP	AAB	0.6	1.2	0.6				0	0				0	0		AB	0.4	0.4	0.4		61.5385	0.227887	0.277365	-0.00599063				1726	0.00858413	0.325212
AMP	AAB	0.6	1.2	0.6				0	0				0	0		AB	0.4	0.4	0.4		61.5385	0.227887	0.885989	-0.00936634				1727	1	0.239197
AMP	AAB	0.6	1.2	0.6				0	0				0	0		AB	0.4	0.4	0.4		61.5385	0.227887	0.143404	-0.013238				1728	0.00134317	0.256702
AMP	AAB	0.6	1.2	0.6				0	0				0	0		AB	0.4	0.4	0.4		61.5385	0.227887	0.154972	-0.0460246				1729	0.00205152	0.204906
AMP	AAB	0.6	1.2	0.6				0	0				0	0		AB	0.4	0.4	0.4		61.5385	0.227887	0.162064	-0.00154804				1730	0.00745894	0.324168
AMP	AAB	0.6	1.2	0.6				0	0				0	0		AB	0.4	0.4	0.4		61.5385	0.227887	0.146336	0.0227405				1731	0.000226534	0.225219
AMP	AAB	0.6	1.2	0.6				0	0				0	0		AB	0.4	0.4	0.4		61.5385	0.227887	0.35225	0.00184013				1732	0.382775	0.170727
AMP	AAB	0.6	1.2	0.6				0	0				0	0		AB	0.4	0.4	0.4		61.5385	0.227887	0.718911	0.0511207				1733	0.999735	0.22049
AMP	AAB	0.6	1.2	0.6				0	0				0	0		AB	0.4	0.4	0.4		61.5385	0.227887	0.6568	0.0768319				1734	0.692216	0.176213
AMP	AAB	0.6	1.2	0.6				0	0				0	0		AB	0.4	0.4	0.4		61.5385	0.227887	0.179935	0.000530439				1735	0.0138247	0.185173
AMP	AAB	0.6	1.2	0.6				0	0				0	0		AB	0.4	0.4	0.4		61.5385	0.227887	0.493752	0.0121169				1736	0.372499	0.227338
AMP	AAB	0.6	1.2	0.6				0	0				0	0		AB	0.4	0.4	0.4		61.5385	0.227887	0.944469	0.0361092				1737	0.997711	0.171034
AMP	AAB	0.6	1.2	0.6				0	0				0	0		AB	0.4	0.4	0.4		61.5385	0.227887	0.487937	0.0486899				1738	0.335925	0.324406
AMP	AAB	0.6	1.2	0.6				0	0				0	0		AB	0.4	0.4	0.4		61.5385	0.227887	0.98343	-0.007857				1739	0.990423	0.295446
AMP	AAB	0.6	1.2	0.6				0	0				0	0		AB	0.4	0.4	0.4		61.5385	0.227887	0.686696	0.0289886				1740	0.644373	0.219341
AMP	AAB	0.6	1.2	0.6				0	0				0	0		AB	0.4	0.4	0.4		61.5385	0.227887	0.0109399	0.0061306				1741	0.000317134	0.087421
AMP	AAB	0.6	1.2	0.6				0	0				0	0		AB	0.4	0.4	0.4		61.5385	0.227887	0.113039	0.00947652				1742	0.000692996	0.248437
AMP	AAB	0.6	1.2	0.6				0	0				0	0		AB	0.4	0.4	0.4		61.5385	0.227887	0.668091	0.00412228				1743	0.619507	0.219021
AMP	AAB	0.6	1.2	0.6				0	0				0	0		AB	0.4	0.4	0.4		61.5385	0.227887	0.227624	0.0500634				1744	0.000938329	0.238733
AMP	AAB	0.6	1.2	0.6				0	0				0	0		AB	0.4	0.4	0.4		61.5385	0.227887	0.670277	-0.00134985				1745	0.614035	0.38925
AMP	AAB	0.6	1.2	0.6				0	0				0	0		AB	0.4	0.4	0.4		61.5385	0.227887	0.968024	-0.0554507				1746	1	0.229476
AMP	AAB	0.6	1.2	0.6				0	0				0	0		AB	0.4	0.4	0.4		61.5385	0.227887	0.50006	0.035338				1747	0.650723	0.417598
AMP	AAB	0.6	1.2	0.6				0	0				0	0		AB	0.4	0.4	0.4		61.5385	0.227887	0.586375	-0.0187282				1748	0.596656	0.324008
AMP	AAB	0.6	1.2	0.6				0	0				0	0		AB	0.4	0.4	0.4		61.5385	0.227887	0.875728	0.0353062				1749	1	0.253751
AMP	AAB	0.6	1.2	0.6				0	0				0	0		AB	0.4	0.4	0.4		61.5385	0.227887	0.158881	0.0274551				1750	0.00560949	0.0836333
AMP	AAB	0.6	1.2	0.6				0	0				0	0		AB	0.4	0.4	0.4		61.5385	0.227887	0.584609	0.065152				1751	0.680537	0.10992
AMP	AAB	0.6	1.2	0.6				0	0				0	0		AB	0.4	0.4	0.4		61.5385	0.227887	0.748197	0.00613037				1752	0.990251	0.12695
AMP	AAB	0.6	1.2	0.6				0	0				0	0		AB	0.4	0.4	0.4		61.5385	0.227887	0.658317	0.0490919				1753	0.664476	0.233459
AMP	AAB	0.6	1.2	0.6				0	0				0	0		AB	0.4	0.4	0.4		61.5385	0.227887	0.456207	0.0205624				1754	0.364053	0.0728356
AMP	AAB	0.6	1.2	0.6				0	0				0	0		AB	0.4	0.4	0.4		61.5385	0.227887	0.329589	0.0124643				1755	0.372151	0.32185
AMP	AAB	0.6	1.2	0.6				0	0				0	0		AB	0.4	0.4	0.4		61.5385	0.227887	0.53089	-0.0458331				1756	0.569551	0.242091
AMP	AAB	0.6	1.2	0.6				0	0				0	0		AB	0.4	0.4	0.4		61.5385	0.227887	0.654682	0.0490251				1757	0.66441	0.376886
AMP	AAB	0.6	1.2	0.6				0	0				0	0		AB	0.4	0.4	0.4		61.5385	0.227887	0.722576	0.0411352				1758	0.992915	0.400412
AMP	AAB	0.6	1.2	0.6				0	0				0	0		AB	0.4	0.4	0.4		61.5385	0.227887	0.0746198	0.000856316				1759	0.0030695	0.0522236
AMP	AAB	0.6	1.2	0.6				0	0				0	0		AB	0.4	0.4	0.4		61.5385	0.227887	0.667537	0.0271572				1760	0.642542	0.229885
AMP	AAB	0.6	1.2	0.6				0	0				0	0		AB	0.4	0.4	0.4		61.5385	0.227887	0.467087	0.0401661				1761	0.344449	0.244102
AMP	AAB	0.6	1.2	0.6				0	0				0	0		AB	0.4	0.4	0.4		61.5385	0.227887	0.994416	-0.0350215				1762	0.992012	0.137674
AMP	AAB	0.6	1.2	0.6				0	0				0	0		AB	0.4	0.4	0.4		61.5385	0.227887	0.746828	-0.00387729				1763	1	0.374953
AMP	AAB	0.6	1.2	0.6				0	0				0	0		AB	0.4	0.4	0.4		61.5385	0.227887	0.765587	-0.0209491				1764	1	0.235612
AMP	AAB	0.6	1.2	0.6				0	0				0	0		AB	0.4	0.4	0.4		61.5385	0.227887	0.151283	0.0144492				1765	0.00316923	0.16419
AMP	AAB	0.6	1.2	0.6				0	0				0	0		AB	0.4	0.4	0.4		61.5385	0.227887	0.0656548	-0.00263148				1766	0.000948657	0.17038
AMP	AAB	0.6	1.2	0.6				0	0				0	0		AB	0.4	0.4	0.4		61.5385	0.227887	0.406927	0.0102425				1767	0.374373	0.225211
AMP	AAB	0.6	1.2	0.6				0	0				0	0		AB	0.4	0.4	0.4		61.5385	0.227887	0.723603	0.0550458				1768	0.998518	0.215364
AMP	AAB	0.6	1.2	0.6				0	0				0	0		AB	0.4	0.4	0.4		61.5385	0.227887	0.729875	0.00835011				1769	0.991965	0.134302
AMP	AAB	0.6	1.2	0.6				0	0				0	0		AB	0.4	0.4	0.4		61.5385	0.227887	0.394153	-0.0182893				1770	0.402905	0.236844
AMP	AAB	0.6	1.2	0.6				0	0				0	0		AB	0.4	0.4	0.4		61.5385	0.227887	0.154	-0.0272436				1771	0.00281654	0.15422
AMP	AAB	0.6	1.2	0.6				0	0				0	0		AB	0.4	0.4	0.4		61.5385	0.227887	0.506243	-0.0213336				1772	0.594051	0.104423
AMP	AAB	0.6	1.2	0.6				0	0				0	0		AB	0.4	0.4	0.4		61.5385	0.227887	0.46044	-0.0232929				1773	0.407908	0.326684
AMP	AAB	0.6	1.2	0.6				0	0				0	0		AB	0.4	0.4	0.4		61.5385	0.227887	0.495643	0.0568093				1774	0.327806	0.260226
AMP	AAB	0.6	1.2	0.6				0	0				0	0		AB	0.4	0.4	0.4		61.5385	0.227887	0.235286	-0.027785				1775	0.0133665	0.231767
AMP	AAB	0.6	1.2	0.6				0	0				0	0		AB	0.4	0.4	0.4		61.5385	0.227887	0.752723	-0.0521004				1776	1	0.223002
AMP	AAB	0.6	1.2	0.6				0	0				0	0		AB	0.4	0.4	0.4		61.5385	0.227887	0.759679	0.00729699				1777	1	0.398477
AMP	AAB	0.6	1.2	0.6				0	0				0	0		AB	0.4	0.4	0.4		61.5385	0.227887	0.781901	0.0271387				1778	0.998859	0.244823
AMP	AAB	0.6	1.2	0.6				0	0				0	0		AB	0.4	0.4	0.4		61.5385	0.227887	0.468052	0.00452282				1779	0.380093	0.24554
AMP	AAB	0.6	1.2	0.6				0	0				0	0		AB	0.4	0.4	0.4		61.5385	0.227887	0.697529	-0.0300322				1780	0.585352	0.227652
AMP	AAB	0.6	1.2	0.6				0	0				0	0		AB	0.4	0.4	0.4		61.5385	0.227887	0.339504	0.0143519				1781	0.370264	0.318679
AMP	AAB	0.6	1.2	0.6				0	0				0	0		AB	0.4	0.4	0.4		61.5385	0.227887	0.570748	0.0130725				1782	0.628457	0.20583
AMP	AAB	0.6	1.2	0.6				0	0				0	0		AB	0.4	0.4	0.4		61.5385	0.227887	0.0950508	-0.0035056				1783	0.00124255	0.226807
AMP	AAB	0.6	1.2	0.6				0	0				0	0		AB	0.4	0.4	0.4		61.5385	0.227887	0.711413	0.0219219				1784	1	0.228029
AMP	AAB	0.6	1.2	0.6				0	0				0	0		AB	0.4	0.4	0.4		61.5385	0.227887	0.572627	-0.0551746				1785	0.56021	0.252062
AMP	AAB	0.6	1.2	0.6				0	0				0	0		AB	0.4	0.4	0.4		61.5385	0.227887	0.0410904	-0.000854501				1786	0.00226715	0.130175
AMP	AAB	0.6	1.2	0.6				0	0				0	0		AB	0.4	0.4	0.4		61.5385	0.227887	0.0899117	-0.00929011				1787	7.68297e-05	0.230612
AMP	AAB	0.6	1.2	0.6				0	0				0	0		AB	0.4	0.4	0.4		61.5385	0.227887	0.0357231	-0.00196154				1788	0.000331871	0.247781
AMP	AAB	0.6	1.2	0.6				0	0				0	0		AB	0.4	0.4	0.4		61.5385	0.227887	0.0996446	-0.00636491				1789	0.000195457	0.227316
AMP	AAB	0.6	1.2	0.6				0	0				0	0		AB	0.4	0.4	0.4		61.5385	0.227887	0.840342	-0.02551				1790	1	0.254568
AMP	AAB	0.6	1.2	0.6				0	0				0	0		AB	0.4	0.4	0.4		61.5385	0.227887	0.235185	-0.0768806				1791	0.00599959	0.199345
AMP	AAB	0.6	1.2	0.6				0	0				0	0		AB	0.4	0.4	0.4		61.5385	0.227887	0.964053	0.0419763				1792	1	0.413105
AMP	AAB	0.6	1.2	0.6				0	0				0	0		AB	0.4	0.4	0.4		61.5385	0.227887	0.543184	0.00043406				1793	0.615819	0.176945
AMP	AAB	0.6	1.2	0.6				0	0				0	0		AB	0.4	0.4	0.4		61.5385	0.227887	0.508428	-0.00395194				1794	0.611433	0.226393
AMP	AAB	0.6	1.2	0.6				0	0				0	0		AB	0.4	0.4	0.4		61.5385	0.227887	0.188488	-0.0353937				1795	0.000744895	0.242607
AMP	AAB	0.6	1.2	0.6				0	0				0	0		AB	0.4	0.4	0.4		61.5385	0.227887	0.847836	0.0306973				1796	1	0.113595
AMP	AAB	0.6	1.2	0.6				0	0				0	0		AB	0.4	0.4	0.4		61.5385	0.227887	0.987323	0.0148637				1797	0.993938	0.206437
AMP	AAB	0.6	1.2	0.6				0	0				0	0		AB	0.4	0.4	0.4		61.5385	0.227887	0.218833	-0.0283102				1798	0.00325268	0.215451
AMP	AAB	0.6	1.2	0.6				0	0				0	0		AB	0.4	0.4	0.4		61.5385	0.227887	0.339263	0.0041148				1799	0.380501	0.254966
AMP	AAB	0.6	1.2	0.6				0	0				0	0		AB	0.4	0.4	0.4		61.5385	0.227887	0.524873	-0.0526479				1800	0.562737	0.246678
AMP	AAB	0.6	1.2	0.6				0	0				0	0		AB	0.4	0.4	0.4		61.5385	0.227887	0.854911	-0.0138872				1801	1	0.00808277
AMP	AAB	0.6	1.2	0.6				0	0				0	0		AB	0.4	0.4	0.4		61.5385	0.227887	0.851512	0.00721962				1802	1	0.288364
AMP	AAB	0.6	1.2	0.6				0	0				0	0		AB	0.4	0.4	0.4		61.5385	0.227887	0.708269	-0.00864737				1803	0.998977	0.224941
AMP	AAB	0.6	1.2	0.6				0	0				0	0		AB	0.4	0.4	0.4		61.5385	0.227887	0.951223	-0.03143				1804	1	0.20291
AMP	AAB	0.6	1.2	0.6				0	0				0	0		AB	0.4	0.4	0.4		61.5385	0.227887	0.295413	0.0521756				1805	0.00928484	0.0947843
AMP	AAB	0.6	1.2	0.6				0	0				0	0		AB	0.4	0.4	0.4		61.5385	0.227887	0.561534	-0.0722449				1806	0.54314	-0.028732
AMP	AAB	0.6	1.2	0.6				0	0				0	0		AB	0.4	0.4	0.4		61.5385	0.227887	0.0587084	0.0716845				1807	0.00424139	0.301209
AMP	AAB	0.6	1.2	0.6				0	0				0	0		AB	0.4	0.4	0.4		61.5385	0.227887	0.87144	0.0092803				1808	0.987506	-0.00460163
AMP	AAB	0.6	1.2	0.6				0	0				0	0		AB	0.4	0.4	0.4		61.5385	0.227887	0.275403	-0.00494735				1809	0.00255582	0.193776
AMP	AAB	0.6	1.2	0.6				0	0				0	0		AB	0.4	0.4	0.4		61.5385	0.227887	0.962899	-0.0233088				1810	1	0.23814
AMP	AAB	0.6	1.2	0.6				0	0				0	0		AB	0.4	0.4	0.4		61.5385	0.227887	0.691551	-7.81243e-05				1811	0.615306	0.281528
AMP	AAB	0.6	1.2	0.6				0	0				0	0		AB	0.4	0.4	0.4		61.5385	0.227887	0.952413	0.0375671				1812	1	0.227601
AMP	AAB	0.6	1.2	0.6				0	0				0	0		AB	0.4	0.4	0.4		61.5385	0.227887	0.401922	-0.00465853				1813	0.389274	0.121718
AMP	AAB	0.6	1.2	0.6				0	0				0	0		AB	0.4	0.4	0.4		61.5385	0.227887	0.703241	0.00282153				1814	1	0.250597
AMP	AAB	0.6	1.2	0.6				0	0				0	0		AB	0.4	0.4	0.4		61.5385	0.227887	0.300779	0.0337581				1815	0.350857	0.227987
AMP	AAB	0.6	1.2	0.6				0	0				0	0		AB	0.4	0.4	0.4		61.5385	0.227887	0.211969	0.0149707				1816	0.00715566	0.340739
AMP	AAB	0.6	1.2	0.6				0	0				0	0		AB	0.4	0.4	0.4		61.5385	0.227887	0.245177	0.0515297				1817	0.00367047	0.249906
AMP	AAB	0.6	1.2	0.6				0	0				0	0		AB	0.4	0.4	0.4		61.5385	0.227887	0.11536	0.0092382				1818	0.00594446	0.0773851
AMP	AAB	0.6	1.2	0.6				0	0				0	0		AB	0.4	0.4	0.4		61.5385	0.227887	0.852278	0.00189287				1819	0.998425	0.200757
AMP	AAB	0.6	1.2	0.6				0	0				0	0		AB	0.4	0.4	0.4		61.5385	0.227887	0.0333135	-0.0103403				1820	6.30581e-05	0.228899
AMP	AAB	0.6	1.2	0.6				0	0				0	0		AB	0.4	0.4	0.4		61.5385	0.227887	0.0296422	0.00880763				1821	0.000306509	0.192925
AMP	AAB	0.6	1.2	0.6				0	0				0	0		AB	0.4	0.4	0.4		61.5385	0.227887	0.57806	-0.0371386				1822	0.578246	0.256136
AMP	AAB	0.6	1.2	0.6				0	0				0	0		AB	0.4	0.4	0.4		61.5385	0.227887	0.222634	0.0170201				1823	0.0082683	0.340623
AMP	AAB	0.6	1.2	0.6				0	0				0	0		AB	0.4	0.4	0.4		61.5385	0.227887	0.415298	-0.00125652				1824	0.385872	0.18656
AMP	AAB	0.6	1.2	0.6				0	0				0	0		AB	0.4	0.4	0.4		61.5385	0.227887	0.819597	0.0297455				1825	1	0.233653
AMP	AAB	0.6	1.2	0.6				0	0				0	0		AB	0.4	0.4	0.4		61.5385	0.227887	0.180516	-0.0550426				1826	0.00536954	0.2902
AMP	AAB	0.6	1.2	0.6				0	0				0	0		AB	0.4	0.4	0.4		61.5385	0.227887	0.615531	-0.000258387				1827	0.615126	0.423201
AMP	AAB	0.6	1.2	0.6				0	0				0	0		AB	0.4	0.4	0.4		61.5385	0.227887	0.633615	-0.0223005				1828	0.593084	0.22901
AMP	AAB	0.6	1.2	0.6				0	0				0	0		AB	0.4	0.4	0.4		61.5385	0.227887	0.735081	0.0583776				1829	1	0.215448
AMP	AAB	0.6	1.2	0.6				0	0				0	0		AB	0.4	0.4	0.4		61.5385	0.227887	0.92616	-0.0476344				1830	0.989187	0.247391
AMP	AAB	0.6	1.2	0.6				0	0				0	0		AB	0.4	0.4	0.4		61.5385	0.227887	0.936771	0.077368				1831	1	-0.00278571
AMP	AAB	0.6	1.2	0.6				0	0				0	0		AB	0.4	0.4	0.4		61.5385	0.227887	0.169046	-0.0245253				1832	0.0130788	0.446001
AMP	AAB	0.6	1.2	0.6				0	0				0	0		AB	0.4	0.4	0.4		61.5385	0.227887	0.172748	-0.0489357				1833	0.0042367	0.29958
AMP	AAB	0.6	1.2	0.6				0	0				0	0		AB	0.4	0.4	0.4		61.5385	0.227887	0.0970262	-0.0141961				1834	0.00474804	0.419055
AMP	AAB	0.6	1.2	0.6				0	0				0	0		AB	0.4	0.4	0.4		61.5385	0.227887	0.116346	0.014428				1835	0.00165166	0.230255
AMP	AAB	0.6	1.2	0.6				0	0				0	0		AB	0.4	0.4	0.4		61.5385	0.227887	0.967741	-0.0527686				1836	0.997207	0.272218
AMP	AAB	0.6	1.2	0.6				0	0				0	0		AB	0.4	0.4	0.4		61.5385	0.227887	0.5059	-0.000949224				1837	0.614435	0.100688
AMP	AAB	0.6	1.2	0.6				0	0				0	0		AB	0.4	0.4	0.4		61.5385	0.227887	0.292787	-0.0201373				1838	0.000277921	0.227219
AMP	AAB	0.6	1.2	0.6				0	0				0	0		AB	0.4	0.4	0.4		61.5385	0.227887	0.0559108	0.027859				1839	0.00112589	0.220436
AMP	AAB	0.6	1.2	0.6				0	0				0	0		AB	0.4	0.4	0.4		61.5385	0.227887	0.360363	0.0409985				1840	0.343617	0.254849
AMP	AAB	0.6	1.2	0.6				0	0				0	0		AB	0.4	0.4	0.4		61.5385	0.227887	0.576117	-0.0366259				1841	0.578759	0.148485
AMP	AAB	0.6	1.2	0.6				0	0				0	0		AB	0.4	0.4	0.4		61.5385	0.227887	0.324505	0.0128215				1842	0.371794	0.361382
AMP	AAB	0.6	1.2	0.6				0	0				0	0		AB	0.4	0.4	0.4		61.5385	0.227887	0.960205	-0.0699401				1843	0.997538	0.257201
AMP	AAB	0.6	1.2	0.6				0	0				0	0		AB	0.4	0.4	0.4		61.5385	0.227887	0.859151	-0.0145814				1844	1	-0.0580077
AMP	AAB	0.6	1.2	0.6				0	0				0	0		AB	0.4	0.4	0.4		61.5385	0.227887	0.168034	0.0414273				1845	0.00245017	0.212135
AMP	AAB	0.6	1.2	0.6				0	0				0	0		AB	0.4	0.4	0.4		61.5385	0.227887	0.416371	-0.0439201				1846	0.428535	0.330116
AMP	AAB	0.6	1.2	0.6				0	0				0	0		AB	0.4	0.4	0.4		61.5385	0.227887	0.947218	-0.037371				1847	1	0.328611
AMP	AAB	0.6	1.2	0.6				0	0				0	0		AB	0.4	0.4	0.4		61.5385	0.227887	0.782984	0.0485947				1848	1	0.368084
AMP	AAB	0.6	1.2	0.6				0	0				0	0		AB	0.4	0.4	0.4		61.5385	0.227887	0.197087	-0.0114474				1849	0.00957737	0.297591
AMP	AAB	0.6	1.2	0.6				0	0				0	0		AB	0.4	0.4	0.4		61.5385	0.227887	0.0894197	-0.000215247				1850	0.00102363	0.21854
AMP	AAB	0.6	1.2	0.6				0	0				0	0		AB	0.4	0.4	0.4		61.5385	0.227887	0.686808	-0.0387417				1851	0.576643	0.227364
AMP	AAB	0.6	1.2	0.6				0	0				0	0		AB	0.4	0.4	0.4		61.5385	0.227887	0.0136763	0.0103965				1852	0.000529842	0.185345
AMP	AAB	0.6	1.2	0.6				0	0				0	0		AB	0.4	0.4	0.4		61.5385	0.227887	0.704058	-0.00763125				1853	0.998536	0.277825
AMP	AAB	0.6	1.2	0.6				0	0				0	0		AB	0.4	0.4	0.4		61.5385	0.227887	0.533511	0.0514389				1854	0.666824	0.213619
AMP	AAB	0.6	1.2	0.6				0	0				0	0		AB	0.4	0.4	0.4		61.5385	0.227887	0.450903	-0.00798275				1855	0.392598	0.3029
AMP	AAB	0.6	1.2	0.6				0	0				0	0		AB	0.4	0.4	0.4		61.5385	0.227887	0.113779	-0.020219				1856	0.000908272	0.189311
AMP	AAB	0.6	1.2	0.6				0	0				0	0		AB	0.4	0.4	0.4		61.5385	0.227887	0.633188	0.0304772				1857	0.645862	0.3117
AMP	AAB	0.6	1.2	0.6				0	0				0	0		AB	0.4	0.4	0.4		61.5385	0.227887	0.200262	-0.0584976				1858	0.00610342	0.35654
AMP	AAB	0.6	1.2	0.6				0	0				0	0		AB	0.4	0.4	0.4		61.5385	0.227887	0.999797	0.0248795				1859	1	0.27671
AMP	AAB	0.6	1.2	0.6				0	0				0	0		AB	0.4	0.4	0.4		61.5385	0.227887	0.549731	0.0350647				1860	0.650449	0.151351
AMP	AAB	0.6	1.2	0.6				0	0				0	0		AB	0.4	0.4	0.4		61.5385	0.227887	0.202056	-0.0477356				1861	0.00708504	0.0763992
AMP	AAB	0.6	1.2	0.6				0	0				0	0		AB	0.4	0.4	0.4		61.5385	0.227887	0.732634	-0.0127054				1862	1	-0.00474429
AMP	AAB	0.6	1.2	0.6				0	0				0	0		AB	0.4	0.4	0.4		61.5385	0.227887	0.92888	0.0527219				1863	1	0.253608
AMP	AAB	0.6	1.2	0.6				0	0				0	0		AB	0.4	0.4	0.4		61.5385	0.227887	0.00629602	-0.00418073				1864	0.000331938	0.18985
AMP	AAB	0.6	1.2	0.6				0	0				0	0		AB	0.4	0.4	0.4		61.5385	0.227887	0.733812	-0.0279697				1865	1	0.24522
AMP	AAB	0.6	1.2	0.6				0	0				0	0		AB	0.4	0.4	0.4		61.5385	0.227887	0.94508	-0.000111951				1866	1	0.107433
AMP	AAB	0.6	1.2	0.6				0	0				0	0		AB	0.4	0.4	0.4		61.5385	0.227887	0.12796	0.00933083				1867	1.43253e-05	0.228402
AMP	AAB	0.6	1.2	0.6				0	0				0	0		AB	0.4	0.4	0.4		61.5385	0.227887	0.479608	-0.05837				1868	0.442985	0.245604
AMP	AAB	0.6	1.2	0.6				0	0				0	0		AB	0.4	0.4	0.4		61.5385	0.227887	0.36145	0.0740312				1869	0.310584	0.237304
AMP	AAB	0.6	1.2	0.6				0	0				0	0		AB	0.4	0.4	0.4		61.5385	0.227887	0.239355	0.0361279				1870	0.0177197	0.127986
AMP	AAB	0.6	1.2	0.6				0	0				0	0		AB	0.4	0.4	0.4		61.5385	0.227887	0.11596	0.00564012				1871	0.0041894	0.359616
AMP	AAB	0.6	1.2	0.6				0	0				0	0		AB	0.4	0.4	0.4		61.5385	0.227887	0.992165	-0.0528902				1872	0.998881	0.243288
AMP	AAB	0.6	1.2	0.6				0	0				0	0		AB	0.4	0.4	0.4		61.5385	0.227887	0.831789	0.0499283				1873	1	0.465635
AMP	AAB	0.6	1.2	0.6				0	0				0	0		AB	0.4	0.4	0.4		61.5385	0.227887	0.285149	-0.040515				1874	0.014237	0.218085
AMP	AAB	0.6	1.2	0.6				0	0				0	0		AB	0.4	0.4	0.4		61.5385	0.227887	0.0379467	0.0241716				1875	0.00153741	0.158281
AMP	AAB	0.6	1.2	0.6				0	0				0	0		AB	0.4	0.4	0.4		61.5385	0.227887	0.278892	-0.026278				1876	0.00674126	0.218284
AMP	AAB	0.6	1.2	0.6				0	0				0	0		AB	0.4	0.4	0.4		61.5385	0.227887	0.947853	-0.00791926				1877	1	0.169747
AMP	AAB	0.6	1.2	0.6				0	0				0	0		AB	0.4	0.4	0.4		61.5385	0.227887	0.0106417	0.0283217				1878	8.42742e-05	0.22385
AMP	AAB	0.6	1.2	0.6				0	0				0	0		AB	0.4	0.4	0.4		61.5385	0.227887	0.279771	0.04817				1879	0.0079236	0.352979
AMP	AAB	0.6	1.2	0.6				0	0				0	0		AB	0.4	0.4	0.4		61.5385	0.227887	0.136728	0.0213882				1880	0.00658617	0.356776
AMP	AAB	0.6	1.2	0.6				0	0				0	0		AB	0.4	0.4	0.4		61.5385	0.227887	0.657653	0.0034248				1881	0.618809	0.287989
AMP	AAB	0.6	1.2	0.6				0	0				0	0		AB	0.4	0.4	0.4		61.5385	0.227887	0.789652	-0.0201066				1882	0.999459	0.220049
AMP	AAB	0.6	1.2	0.6				0	0				0	0		AB	0.4	0.4	0.4		61.5385	0.227887	0.657676	0.00835292				1883	0.623738	0.18258
AMP	AAB	0.6	1.2	0.6				0	0				0	0		AB	0.4	0.4	0.4		61.5385	0.227887	0.601217	-0.00454146				1884	0.610843	0.209672
AMP	AAB	0.6	1.2	0.6				0	0				0	0		AB	0.4	0.4	0.4		61.5385	0.227887	0.0702944	-0.0409272				1885	0.000319239	0.214741
AMP	AAB	0.6	1.2	0.6				0	0				0	0		AB	0.4	0.4	0.4		61.5385	0.227887	0.990101	0.058968				1886	1	0.262898
AMP	AAB	0.6	1.2	0.6				0	0				0	0		AB	0.4	0.4	0.4		61.5385	0.227887	0.693862	0.017756				1887	0.633141	0.345318
AMP	AAB	0.6	1.2	0.6				0	0				0	0		AB	0.4	0.4	0.4		61.5385	0.227887	0.482787	0.0305208				1888	0.354095	0.190551
AMP	AAB	0.6	1.2	0.6				0	0				0	0		AB	0.4	0.4	0.4		61.5385	0.227887	0.87732	0.00739408				1889	0.994645	0.261862
AMP	AAB	0.6	1.2	0.6				0	0				0	0		AB	0.4	0.4	0.4		61.5385	0.227887	0.935893	-0.0231641				1890	0.998616	0.211605
AMP	AAB	0.6	1.2	0.6				0	0				0	0		AB	0.4	0.4	0.4		61.5385	0.227887	0.616675	0.0243242				1891	0.639709	0.131309
AMP	AAB	0.6	1.2	0.6				0	0				0	0		AB	0.4	0.4	0.4		61.5385	0.227887	0.0546714	0.00456987				1892	0.00132984	0.139431
AMP	AAB	0.6	1.2	0.6				0	0				0	0		AB	0.4	0.4	0.4		61.5385	0.227887	0.0321728	-0.00156438				1893	0.000147025	0.225998
AMP	AAB	0.6	1.2	0.6				0	0				0	0		AB	0.4	0.4	0.4		61.5385	0.227887	0.686439	-0.0453654				1894	0.570019	0.226687
AMP	AAB	0.6	1.2	0.6				0	0				0	0		AB	0.4	0.4	0.4		61.5385	0.227887	0.568956	-0.00203909				1895	0.613346	0.365564
AMP	AAB	0.6	1.2	0.6				0	0				0	0		AB	0.4	0.4	0.4		61.5385	0.227887	0.853666	0.0143767				1896	1	0.22275
AMP	AAB	0.6	1.2	0.6				0	0				0	0		AB	0.4	0.4	0.4		61.5385	0.227887	0.0902658	0.0723859				1897	0.00129772	0.278602
AMP	AAB	0.6	1.2	0.6				0	0				0	0		AB	0.4	0.4	0.4		61.5385	0.227887	0.455722	0.0252597				1898	0.359356	-0.030503
AMP	AAB	0.6	1.2	0.6				0	0				0	0		AB	0.4	0.4	0.4		61.5385	0.227887	0.493627	-0.00617052				1899	0.390786	0.351536
AMP	AAB	0.6	1.2	0.6				0	0				0	0		AB	0.4	0.4	0.4		61.5385	0.227887	0.440965	0.0592731				1900	0.325342	0.229641
AMP	AAB	0.6	1.2	0.6				0	0				0	0		AB	0.4	0.4	0.4		61.5385	0.227887	0.820945	-0.0325889				1901	0.990268	0.00871453
AMP	AAB	0.6	1.2	0.6				0	0				0	0		AB	0.4	0.4	0.4		61.5385	0.227887	0.254477	0.00444225				1902	0.00829313	0.221385
AMP	AAB	0.6	1.2	0.6				0	0				0	0		AB	0.4	0.4	0.4		61.5385	0.227887	0.577594	-0.0565038				1903	0.558881	0.222654
AMP	AAB	0.6	1.2	0.6				0	0				0	0		AB	0.4	0.4	0.4		61.5385	0.227887	0.967403	-0.00544267				1904	1	0.0623126
AMP	AAB	0.6	1.2	0.6				0	0				0	0		AB	0.4	0.4	0.4		61.5385	0.227887	0.93361	0.00291988				1905	1	0.217389
AMP	AAB	0.6	1.2	0.6				0	0				0	0		AB	0.4	0.4	0.4		61.5385	0.227887	0.203214	-0.0324111				1906	0.000593359	0.238395
AMP	AAB	0.6	1.2	0.6				0	0				0	0		AB	0.4	0.4	0.4		61.5385	0.227887	0.82176	-0.0171605				1907	1	0.355544
AMP	AAB	0.6	1.2	0.6				0	0				0	0		AB	0.4	0.4	0.4		61.5385	0.227887	0.833319	0.0735266				1908	1	0.167017
AMP	AAB	0.6	1.2	0.6				0	0				0	0		AB	0.4	0.4	0.4		61.5385	0.227887	0.951028	0.0143472				1909	0.986015	0.587921
AMP	AAB	0.6	1.2	0.6				0	0				0	0		AB	0.4	0.4	0.4		61.5385	0.227887	0.642646	0.00298818				1910	0.618373	0.278931
AMP	AAB	0.6	1.2	0.6				0	0				0	0		AB	0.4	0.4	0.4		61.5385	0.227887	0.778578	0.00879073				1911	0.999535	0.228091
AMP	AAB	0.6	1.2	0.6				0	0				0	0		AB	0.4	0.4	0.4		61.5385	0.227887	0.0468885	-0.0220415				1912	0.000412184	0.188217
AMP	AAB	0.6	1.2	0.6				0	0				0	0		AB	0.4	0.4	0.4		61.5385	0.227887	0.154472	0.0231534				1913	0.00340478	0.287907
AMP	AAB	0.6	1.2	0.6				0	0				0	0		AB	0.4	0.4	0.4		61.5385	0.227887	0.936042	-0.000912254				1914	0.995665	0.317949
AMP	AAB	0.6	1.2	0.6				0	0				0	0		AB	0.4	0.4	0.4		61.5385	0.227887	0.578519	0.0034266				1915	0.618811	0.225218
AMP	AAB	0.6	1.2	0.6				0	0				0	0		AB	0.4	0.4	0.4		61.5385	0.227887	0.569567	0.00406442				1916	0.619449	0.232642
AMP	AAB	0.6	1.2	0.6				0	0				0	0		AB	0.4	0.4	0.4		61.5385	0.227887	0.856082	-0.0153531				1917	0.999304	0.23648
AMP	AAB	0.6	1.2	0.6				0	0				0	0		AB	0.4	0.4	0.4		61.5385	0.227887	0.874337	0.0204014				1918	1	0.167066
AMP	AAB	0.6	1.2	0.6				0	0				0	0		AB	0.4	0.4	0.4		61.5385	0.227887	0.716476	-0.00856193				1919	0.997077	0.197258
AMP	AAB	0.6	1.2	0.6				0	0				0	0		AB	0.4	0.4	0.4		61.5385	0.227887	0.473871	0.0592884				1920	0.325327	0.238729
AMP	AAB	0.6	1.2	0.6				0	0				0	0		AB	0.4	0.4	0.4		61.5385	0.227887	0.517453	0.0139536				1921	0.629338	0.128553
AMP	AAB	0.6	1.2	0.6				0	0				0	0		AB	0.4	0.4	0.4		61.5385	0.227887	0.834167	-0.0213692				1922	0.997672	0.287837
AMP	AAB	0.6	1.2	0.6				0	0				0	0		AB	0.4	0.4	0.4		61.5385	0.227887	0.179777	-0.0432087				1923	0.0038417	0.135839
AMP	AAB	0.6	1.2	0.6				0	0				0	0		AB	0.4	0.4	0.4		61.5385	0.227887	0.0481712	-0.00113634				1924	0.00208141	0.0765254
AMP	AAB	0.6	1.2	0.6				0	0				0	0		AB	0.4	0.4	0.4		61.5385	0.227887	0.833182	-0.0315119				1925	1	0.224412
AMP	AAB	0.6	1.2	0.6				0	0				0	0		AB	0.4	0.4	0.4		61.5385	0.227887	0.66632	0.0186425				1926	0.634027	0.36094
AMP	AAB	0.6	1.2	0.6				0	0				0	0		AB	0.4	0.4	0.4		61.5385	0.227887	0.747176	-0.00108182				1927	0.997214	0.204859
AMP	AAB	0.6	1.2	0.6				0	0				0	0		AB	0.4	0.4	0.4		61.5385	0.227887	0.128158	-0.0429764				1928	0.000138644	0.224021
AMP	AAB	0.6	1.2	0.6				0	0				0	0		AB	0.4	0.4	0.4		61.5385	0.227887	0.928278	-0.022072				1929	1	0.179435
AMP	AAB	0.6	1.2	0.6				0	0				0	0		AB	0.4	0.4	0.4		61.5385	0.227887	0.910693	-0.029537				1930	1	0.190234
AMP	AAB	0.6	1.2	0.6				0	0				0	0		AB	0.4	0.4	0.4		61.5385	0.227887	0.0665574	-0.0846875				1931	0.0019659	0.146581
AMP	AAB	0.6	1.2	0.6				0	0				0	0		AB	0.4	0.4	0.4		61.5385	0.227887	0.880494	-0.000605536				1932	1	0.626331
AMP	AAB	0.6	1.2	0.6				0	0				0	0		AB	0.4	0.4	0.4		61.5385	0.227887	0.904527	0.00468559				1933	1	0.22993
AMP	AAB	0.6	1.2	0.6				0	0				0	0		AB	0.4	0.4	0.4		61.5385	0.227887	0.823071	0.0626286				1934	0.999229	0.237205
AMP	AAB	0.6	1.2	0.6				0	0				0	0		AB	0.4	0.4	0.4		61.5385	0.227887	0.390851	0.0602811				1935	0.324334	0.27865
AMP	AAB	0.6	1.2	0.6				0	0				0	0		AB	0.4	0.4	0.4		61.5385	0.227887	0.90965	0.0540585				1936	0.989033	-0.0238168
AMP	AAB	0.6	1.2	0.6				0	0				0	0		AB	0.4	0.4	0.4		61.5385	0.227887	0.257808	0.0590579				1937	0.0139367	-0.032932
AMP	AAB	0.6	1.2	0.6				0	0				0	0		AB	0.4	0.4	0.4		61.5385	0.227887	0.793882	0.00216583				1938	0.990623	0.050726
AMP	AAB	0.6	1.2	0.6				0	0				0	0		AB	0.4	0.4	0.4		61.5385	0.227887	0.279597	0.0382345				1939	0.00060556	0.226668
AMP	AAB	0.6	1.2	0.6				0	0				0	0		AB	0.4	0.4	0.4		61.5385	0.227887	0.13438	-0.0342619				1940	0.00513795	0.174652
AMP	AAB	0.6	1.2	0.6				0	0				0	0		AB	0.4	0.4	0.4		61.5385	0.227887	0.782904	-0.0410913				1941	1	0.169323
AMP	AAB	0.6	1.2	0.6				0	0				0	0		AB	0.4	0.4	0.4		61.5385	0.227887	0.563971	-0.0254309				1942	0.589954	0.101039
AMP	AAB	0.6	1.2	0.6				0	0				0	0		AB	0.4	0.4	0.4		61.5385	0.227887	0.66705	-0.0767598				1943	0.538625	0.257589
AMP	AAB	0.6	1.2	0.6				0	0				0	0		AB	0.4	0.4	0.4		61.5385	0.227887	0.136724	0.0334792				1944	0.0104949	0.125982
AMP	AAB	0.6	1.2	0.6				0	0				0	0		AB	0.4	0.4	0.4		61.5385	0.227887	0.148075	0.024012				1945	0.00495743	0.337262
AMP	AAB	0.6	1.2	0.6				0	0				0	0		AB	0.4	0.4	0.4		61.5385	0.227887	0.52777	0.00243008				1946	0.617815	0.22206
AMP	AAB	0.6	1.2	0.6				0	0				0	0		AB	0.4	0.4	0.4		61.5385	0.227887	0.839163	0.018243				1947	0.999592	0.23595
AMP	AAB	0.6	1.2	0.6				0	0				0	0		AB	0.4	0.4	0.4		61.5385	0.227887	0.852784	-0.000184291				1948	0.996889	0.289431
AMP	AAB	0.6	1.2	0.6				0	0				0	0		AB	0.4	0.4	0.4		61.5385	0.227887	0.0425374	-0.0392559				1949	7.83925e-06	0.227582
AMP	AAB	0.6	1.2	0.6				0	0				0	0		AB	0.4	0.4	0.4		61.5385	0.227887	0.460062	0.00791347				1950	0.376702	0.312369
AMP	AAB	0.6	1.2	0.6				0	0				0	0		AB	0.4	0.4	0.4		61.5385	0.227887	0.803108	-0.039678				1951	0.998729	0.263274
AMP	AAB	0.6	1.2	0.6				0	0				0	0		AB	0.4	0.4	0.4		61.5385	0.227887	0.729957	-0.0409333				1952	1	0.172178
AMP	AAB	0.6	1.2	0.6				0	0				0	0		AB	0.4	0.4	0.4		61.5385	0.227887	0.981734	-0.0245626				1953	1	0.0599806
AMP	AAB	0.6	1.2	0.6				0	0				0	0		AB	0.4	0.4	0.4		61.5385	0.227887	0.932474	0.00382853				1954	1	0.323168
AMP	AAB	0.6	1.2	0.6				0	0				0	0		AB	0.4	0.4	0.4		61.5385	0.227887	0.133964	0.0566541				1955	0.000512886	0.235133
AMP	AAB	0.6	1.2	0.6				0	0				0	0		AB	0.4	0.4	0.4		61.5385	0.227887	0.240265	-0.000564126				1956	0.013612	0.028645
AMP	AAB	0.6	1.2	0.6				0	0				0	0		AB	0.4	0.4	0.4		61.5385	0.227887	0.17705	-0.0628881				1957	9.98784e-05	0.227225
AMP	AAB	0.6	1.2	0.6				0	0				0	0		AB	0.4	0.4	0.4		61.5385	0.227887	0.271865	0.011315				1958	0.0170971	0.233312
AMP	AAB	0.6	1.2	0.6				0	0				0	0		AB	0.4	0.4	0.4		61.5385	0.227887	0.236446	-0.0193612				1959	0.00267539	0.258409
AMP	AAB	0.6	1.2	0.6				0	0				0	0		AB	0.4	0.4	0.4		61.5385	0.227887	0.69193	-0.0199457				1960	0.595439	0.240161
AMP	AAB	0.6	1.2	0.6				0	0				0	0		AB	0.4	0.4	0.4		61.5385	0.227887	0.87326	-0.0368063				1961	1	0.212586
AMP	AAB	0.6	1.2	0.6				0	0				0	0		AB	0.4	0.4	0.4		61.5385	0.227887	0.656329	-0.0065497				1962	0.608835	0.363073
AMP	AAB	0.6	1.2	0.6				0	0				0	0		AB	0.4	0.4	0.4		61.5385	0.227887	0.897735	0.00250352				1963	1	0.208591
AMP	AAB	0.6	1.2	0.6				0	0				0	0		AB	0.4	0.4	0.4		61.5385	0.227887	0.853054	0.0154664				1964	0.999573	0.235844
AMP	AAB	0.6	1.2	0.6				0	0				0	0		AB	0.4	0.4	0.4		61.5385	0.227887	0.400255	-0.0464059				1965	0.431021	0.270185
AMP	AAB	0.6	1.2	0.6				0	0				0	0		AB	0.4	0.4	0.4		61.5385	0.227887	0.541769	-0.0708835				1966	0.544501	0.395328
AMP	AAB	0.6	1.2	0.6				0	0				0	0		AB	0.4	0.4	0.4		61.5385	0.227887	0.458244	0.0224587				1967	0.362157	0.40329
AMP	AAB	0.6	1.2	0.6				0	0				0	0		AB	0.4	0.4	0.4		61.5385	0.227887	0.243391	-0.0123322				1968	0.00546624	0.135827
AMP	AAB	0.6	1.2	0.6				0	0				0	0		AB	0.4	0.4	0.4		61.5385	0.227887	0.251283	0.00150062				1969	0.00309889	0.202915
AMP	AAB	0.6	1.2	0.6				0	0				0	0		AB	0.4	0.4	0.4		61.5385	0.227887	0.791834	-0.0259467				1970	0.999762	0.223954
AMP	AAB	0.6	1.2	0.6				0	0				0	0		AB	0.4	0.4	0.4		61.5385	0.227887	0.62224	0.00125267				1971	0.616637	0.347461
AMP	AAB	0.6	1.2	0.6				0	0				0	0		AB	0.4	0.4	0.4		61.5385	0.227887	0.447427	-0.000708679				1972	0.385324	0.226565
AMP	AAB	0.6	1.2	0.6				0	0				0	0		AB	0.4	0.4	0.4		61.5385	0.227887	0.339039	-0.0349804				1973	0.419596	0.231292
AMP	AAB	0.6	1.2	0.6				0	0				0	0		AB	0.4	0.4	0.4		61.5385	0.227887	0.685574	-0.0128023				1974	0.602582	0.284865
AMP	AAB	0.6	1.2	0.6				0	0				0	0		AB	0.4	0.4	0.4		61.5385	0.227887	0.299725	0.0133346				1975	0.00383717	0.258373
AMP	AAB	0.6	1.2	0.6				0	0				0	0		AB	0.4	0.4	0.4		61.5385	0.227887	0.443897	0.0175528				1976	0.367063	0.277448
AMP	AAB	0.6	1.2	0.6				0	0				0	0		AB	0.4	0.4	0.4		61.5385	0.227887	0.663835	0.0356597				1977	0.651044	0.309678
AMP	AAB	0.6	1.2	0.6				0	0				0	0		AB	0.4	0.4	0.4		61.5385	0.227887	0.0574389	0.0270437				1978	0.00204826	0.262485
AMP	AAB	0.6	1.2	0.6				0	0				0	0		AB	0.4	0.4	0.4		61.5385	0.227887	0.250993	0.0338919				1979	0.00678777	0.15623
AMP	AAB	0.6	1.2	0.6				0	0				0	0		AB	0.4	0.4	0.4		61.5385	0.227887	0.713943	-0.00857201				1980	0.995161	0.316437
AMP	AAB	0.6	1.2	0.6				0	0				0	0		AB	0.4	0.4	0.4		61.5385	0.227887	0.80476	-0.0238849				1981	1	0.246481
AMP	AAB	0.6	1.2	0.6				0	0				0	0		AB	0.4	0.4	0.4		61.5385	0.227887	0.387658	0.0202814				1982	0.364334	0.274277
AMP	AAB	0.6	1.2	0.6				0	0				0	0		AB	0.4	0.4	0.4		61.5385	0.227887	0.124907	0.0561682				1983	0.00253328	0.141602
AMP	AAB	0.6	1.2	0.6				0	0				0	0		AB	0.4	0.4	0.4		61.5385	0.227887	0.0305376	0.0168507				1984	0.00171525	0.000215471
AMP	AAB	0.6	1.2	0.6				0	0				0	0		AB	0.4	0.4	0.4		61.5385	0.227887	0.103377	-0.00295592				1985	0.00174197	0.240977
AMP	AAB	0.6	1.2	0.6				0	0				0	0		AB	0.4	0.4	0.4		61.5385	0.227887	0.106041	0.0655787				1986	0.000313448	0.221759
AMP	AAB	0.6	1.2	0.6				0	0				0	0		AB	0.4	0.4	0.4		61.5385	0.227887	0.835083	0.00222627				1987	0.989047	0.0829315
AMP	AAB	0.6	1.2	0.6				0	0				0	0		AB	0.4	0.4	0.4		61.5385	0.227887	0.445725	-0.0109917				1988	0.395607	0.22987
AMP	AAB	0.6	1.2	0.6				0	0				0	0		AB	0.4	0.4	0.4		61.5385	0.227887	0.859083	-0.0140033				1989	1	0.178381
AMP	AAB	0.6	1.2	0.6				0	0				0	0		AB	0.4	0.4	0.4		61.5385	0.227887	0.691452	-0.00132188				1990	0.614063	0.193097
AMP	AAB	0.6	1.2	0.6				0	0				0	0		AB	0.4	0.4	0.4		61.5385	0.227887	0.283564	0.0309328				1991	0.000374836	0.221595
AMP	AAB	0.6	1.2	0.6				0	0				0	0		AB	0.4	0.4	0.4		61.5385	0.227887	0.319307	-0.00481226				1992	0.389428	0.106205
AMP	AAB	0.6	1.2	0.6				0	0				0	0		AB	0.4	0.4	0.4		61.5385	0.227887	0.0709669	0.0697968				1993	0.000341511	0.224294
AMP	AAB	0.6	1.2	0.6				0	0				0	0		AB	0.4	0.4	0.4		61.5385	0.227887	0.723967	-0.00403509				1994	0.989894	0.0184599
AMP	AAB	0.6	1.2	0.6				0	0				0	0		AB	0.4	0.4	0.4		61.5385	0.227887	0.444021	0.0385155				1995	0.3461	0.236455
AMP	AAB	0.6	1.2	0.6				0	0				0	0		AB	0.4	0.4	0.4		61.5385	0.227887	0.49827	0.0513774				1996	0.333238	0.11097
AMP	AAB	0.6	1.2	0.6				0	0				0	0		AB	0.4	0.4	0.4		61.5385	0.227887	0.20837	-0.00438441				1997	0.0107055	0.284155
AMP	AAB	0.6	1.2	0.6				0	0				0	0		AB	0.4	0.4	0.4		61.5385	0.227887	0.451234	-0.00408594				1998	0.388701	0.224849
AMP	AAB	0.5	1	0.5				0	0				0	0		AB	0.5	0.5	0.5		60	0.19382	0.653136	0.0110696				1999	0.61107	0.196491
[truncated: 3,000 more rows]

## Sheet: lookups
GENO	fraction A	fraction B	copies of A	copies of B		Description
AB	0.5	0.5	1	1		normal 2n
A	1	0	1	0		1n LOH
0	0	0	0	0		HD
AAB	0.666667	0.333333	2	1		3n gain
AAA	1	0	3	0		3n LOH-gain
AAAB	0.75	0.25	3	1		4n gain
AAAA	1	0	4	0		4n-LOH-gain
AABB	0.5	0.5	2	2		4n-copy neut gain
AAAAB	0.8	0.2	4	1		5n gain
AAABB	0.6	0.4	3	2		5n 3/2gain
AAAAA	1	0	5	0		5n-LOH-gain
AAAAAB	0.833333	0.166667	5	1		6n gain
AAAABB	0.666667	0.333333	4	2		6n 4/2gain
AAAAAA	1	0	6	0		6n-LOH-gain
AAABBB	0.5	0.5	3	3		4n-copy neut gain
AA	1	0	2	0		copy neutral LOH
